# Supplementary material for: On the stability of acid-soluble pea protein-stabilized beverage emulsions against salt addition and heat treatment
Source: Royal Society of Chemistry journal article supplement (doi:10.1039/d4ra06899h), 2025-01-01
Supplement: d4ra06899h1.xlsx [file d4ra06899h1.xlsx]

## Sheet: Fig 2a
ASPP			PPC
Temperature (°C)	Heat Flow Endo Up (mW)		Temperature (°C)	Heat Flow Endo Up (mW)
10.08	7.8977		10.09	8.517
10.09	8.0196		10.09	8.5858
10.09	8.1405		10.09	8.654
10.09	8.2603		10.08	8.7215
10.08	8.3787		10.08	8.788
10.08	8.4955		10.08	8.854
10.08	8.6111		10.09	8.9192
10.08	8.7251		10.09	8.9837
10.08	8.8378		10.08	9.0476
10.08	8.9491		10.08	9.1107
10.08	9.0595		10.09	9.173
10.08	9.1681		10.09	9.2346
10.08	9.2751		10.09	9.2958
10.08	9.3813		10.09	9.3562
10.08	9.4861		10.08	9.4162
10.08	9.59		10.08	9.4754
10.08	9.6919		10.08	9.534
10.08	9.7928		10.09	9.5917
10.08	9.8931		10.09	9.6491
10.08	9.9914		10.08	9.7058
10.08	10.0889		10.08	9.7619
10.08	10.1853		10.08	9.8172
10.08	10.2805		10.09	9.8721
10.09	10.3741		10.08	9.9264
10.08	10.4674		10.08	9.9801
10.08	10.5595		10.08	10.0332
10.08	10.6498		10.09	10.0853
10.08	10.7399		10.09	10.1373
10.08	10.8283		10.09	10.1888
10.08	10.9159		10.08	10.2399
10.08	11.0025		10.08	10.2902
10.08	11.0879		10.09	10.3399
10.08	11.1719		10.09	10.3893
10.08	11.2553		10.09	10.438
10.08	11.3376		10.09	10.4863
10.08	11.419		10.09	10.534
10.08	11.4999		10.09	10.5814
10.08	11.5794		10.09	10.6282
10.08	11.6581		10.09	10.6744
10.08	11.7361		10.08	10.7203
10.08	11.8125		10.08	10.7656
10.08	11.8882		10.08	10.8103
10.08	11.9629		10.08	10.8546
10.08	12.037		10.08	10.8986
10.08	12.1101		10.08	10.9419
10.08	12.1818		10.08	10.9848
10.08	12.2531		10.08	11.0273
10.08	12.3235		10.08	11.0692
10.08	12.3932		10.09	11.1107
10.08	12.4617		10.08	11.1521
10.08	12.53		10.08	11.1928
10.08	12.5973		10.08	11.2329
10.08	12.6636		10.08	11.2727
10.08	12.7293		10.09	11.312
10.08	12.794		10.08	11.351
10.08	12.8581		10.08	11.3895
10.08	12.9214		10.08	11.4277
10.08	12.9839		10.08	11.4655
10.08	13.0462		10.08	11.5027
10.08	13.1069		10.08	11.5396
10.08	13.1678		10.08	11.5763
10.08	13.2275		10.08	11.6125
10.08	13.2861		10.08	11.6482
10.08	13.3448		10.08	11.6837
10.08	13.4022		10.08	11.7186
10.08	13.4592		10.09	11.7532
10.08	13.5153		10.08	11.7877
10.08	13.5709		10.08	11.8217
10.08	13.6258		10.08	11.8555
10.08	13.6797		10.08	11.8889
10.08	13.7334		10.08	11.9217
10.08	13.7866		10.08	11.9543
10.08	13.839		10.08	11.9867
10.08	13.8908		10.08	12.0188
10.08	13.942		10.08	12.0505
10.08	13.9928		10.08	12.0819
10.08	14.0424		10.08	12.1127
10.08	14.0918		10.08	12.1432
10.08	14.1406		10.08	12.1734
10.08	14.1889		10.08	12.2032
10.08	14.2366		10.08	12.2329
10.08	14.2839		10.08	12.2623
10.08	14.3305		10.08	12.2913
10.08	14.3765		10.08	12.3199
10.08	14.4223		10.08	12.3483
10.08	14.4672		10.08	12.3765
10.08	14.5117		10.08	12.4044
10.08	14.5551		10.08	12.4319
10.08	14.5982		10.09	12.4589
10.08	14.6419		10.08	12.486
10.08	14.6843		10.08	12.5126
10.08	14.7263		10.08	12.539
10.08	14.7673		10.09	12.5651
10.08	14.8085		10.08	12.5911
10.08	14.8488		10.08	12.6167
10.08	14.8884		10.08	12.6421
10.08	14.9282		10.08	12.6672
10.07	14.9678		10.08	12.692
10.08	15.006		10.08	12.7167
10.08	15.0442		10.08	12.741
10.08	15.0814		10.08	12.765
10.08	15.1181		10.08	12.7888
10.08	15.1553		10.08	12.8125
10.08	15.1921		10.08	12.836
10.08	15.2281		10.08	12.8588
10.08	15.2633		10.08	12.8816
10.08	15.2984		10.08	12.9043
10.08	15.3334		10.08	12.9265
10.08	15.3677		10.08	12.9488
10.08	15.401		10.08	12.9707
10.08	15.4348		10.08	12.9924
10.08	15.4679		10.08	13.0138
10.08	15.5003		10.08	13.0351
10.08	15.5328		10.08	13.0561
10.08	15.5647		10.08	13.077
10.08	15.5965		10.08	13.0975
10.08	15.6278		10.08	13.1178
10.08	15.6591		10.08	13.138
10.08	15.6897		10.08	13.158
10.08	15.7194		10.08	13.1775
10.08	15.749		10.08	13.1971
10.08	15.7785		10.08	13.2164
10.08	15.808		10.08	13.2355
10.08	15.8367		10.08	13.2545
10.08	15.8651		10.09	13.2731
10.07	15.8937		10.09	13.2917
10.08	15.9209		10.08	13.3101
10.08	15.948		10.08	13.3284
10.08	15.9751		10.08	13.3464
10.08	16.0023		10.08	13.3643
10.08	16.0285		10.08	13.3818
10.08	16.0551		10.08	13.3992
10.08	16.0808		10.08	13.4164
10.08	16.1065		10.08	13.4336
10.08	16.1314		10.08	13.4505
10.08	16.1569		10.08	13.4673
10.08	16.1817		10.08	13.4838
10.08	16.2061		10.08	13.5001
10.08	16.2302		10.08	13.5164
10.07	16.2546		10.08	13.5324
10.08	16.2777		10.08	13.5483
10.08	16.3009		10.08	13.5638
10.08	16.324		10.08	13.5795
10.07	16.3471		10.08	13.5947
10.08	16.3686		10.08	13.6101
10.08	16.3911		10.08	13.625
10.08	16.4131		10.08	13.6398
10.08	16.4349		10.08	13.6545
10.08	16.4563		10.08	13.6689
10.08	16.4774		10.08	13.6833
10.08	16.4982		10.08	13.6978
10.08	16.5186		10.08	13.7119
10.08	16.5392		10.08	13.7259
10.08	16.5599		10.08	13.7399
10.08	16.58		10.08	13.7537
10.08	16.5998		10.08	13.7674
10.08	16.6193		10.08	13.7807
10.08	16.6388		10.08	13.7942
10.08	16.6574		10.08	13.8072
10.08	16.6767		10.08	13.8204
10.08	16.6951		10.08	13.8332
10.07	16.714		10.08	13.846
10.08	16.7319		10.08	13.8587
10.08	16.75		10.08	13.8712
10.07	16.7683		10.08	13.8837
10.08	16.7856		10.08	13.896
10.08	16.8031		10.08	13.9083
10.08	16.82		10.08	13.9203
10.08	16.837		10.08	13.9322
10.08	16.8538		10.08	13.9441
10.08	16.8707		10.08	13.9556
10.08	16.8872		10.08	13.9674
10.08	16.9036		10.08	13.9788
10.08	16.9198		10.08	13.9903
10.08	16.9357		10.08	14.0015
10.08	16.9509		10.08	14.0126
10.08	16.9663		10.08	14.0235
10.08	16.9815		10.08	14.0344
10.08	16.9971		10.08	14.045
10.08	17.0122		10.08	14.0555
10.08	17.0271		10.08	14.0661
10.08	17.0417		10.08	14.0766
10.07	17.0566		10.08	14.087
10.07	17.0708		10.08	14.0971
10.08	17.0845		10.08	14.1071
10.08	17.0983		10.08	14.1171
10.08	17.1123		10.08	14.1269
10.08	17.1258		10.08	14.1367
10.08	17.1393		10.08	14.1465
10.08	17.1527		10.08	14.1562
10.08	17.166		10.08	14.1657
10.08	17.1792		10.08	14.1752
10.08	17.1919		10.08	14.1844
10.08	17.2043		10.08	14.1936
10.08	17.2173		10.08	14.2029
10.08	17.2298		10.08	14.2119
10.08	17.2423		10.08	14.2208
10.07	17.2551		10.08	14.2295
10.08	17.2667		10.08	14.2382
10.08	17.2787		10.08	14.2468
10.07	17.2908		10.08	14.2553
10.08	17.302		10.08	14.264
10.08	17.3136		10.08	14.2724
10.07	17.3253		10.08	14.2808
10.07	17.3364		10.08	14.2891
10.08	17.347		10.08	14.2972
10.08	17.3578		10.08	14.3052
10.08	17.3687		10.08	14.3132
10.08	17.3795		10.08	14.3212
10.08	17.3897		10.08	14.3288
10.08	17.4005		10.08	14.3366
10.08	17.4111		10.08	14.3443
10.08	17.4216		10.08	14.352
10.08	17.4318		10.08	14.3595
10.08	17.4419		10.08	14.3669
10.08	17.4517		10.08	14.374
10.08	17.4617		10.08	14.3813
10.08	17.4713		10.08	14.3885
10.08	17.4808		10.08	14.3956
10.07	17.4907		10.08	14.4026
10.07	17.5001		10.08	14.4096
10.08	17.5088		10.08	14.4167
10.08	17.5179		10.08	14.4234
10.08	17.527		10.08	14.4303
10.08	17.536		10.08	14.4369
10.08	17.5449		10.08	14.4436
10.08	17.5534		10.08	14.4503
10.08	17.5621		10.08	14.4568
10.07	17.5711		10.08	14.4632
10.07	17.5794		10.08	14.4696
10.07	17.5878		10.08	14.4759
10.08	17.5954		10.08	14.4822
10.08	17.6036		10.08	14.4884
10.07	17.6121		10.08	14.4944
10.07	17.6202		10.08	14.5003
10.07	17.628		10.08	14.5064
10.07	17.6356		10.08	14.5123
10.07	17.6433		10.08	14.5181
10.08	17.6505		10.08	14.5238
10.08	17.6581		10.08	14.5295
10.08	17.6656		10.08	14.5352
10.08	17.6729		10.08	14.5409
10.07	17.6806		10.08	14.5465
10.07	17.6878		10.08	14.5521
10.08	17.6944		10.08	14.5575
10.07	17.7019		10.08	14.563
10.07	17.7087		10.08	14.5682
10.07	17.7156		10.08	14.5736
10.08	17.722		10.08	14.5787
10.07	17.7293		10.08	14.5838
10.07	17.7361		10.08	14.5888
10.07	17.7427		10.08	14.5939
10.07	17.7492		10.08	14.5989
10.08	17.7551		10.08	14.6038
10.08	17.7616		10.08	14.6089
10.08	17.7679		10.08	14.6139
10.08	17.7743		10.08	14.6187
10.07	17.7808		10.08	14.6236
10.07	17.787		10.08	14.6282
10.07	17.7932		10.08	14.633
10.08	17.7982		10.08	14.6375
10.08	17.8043		10.08	14.6421
10.08	17.8103		10.08	14.6467
10.08	17.816		10.08	14.6511
10.07	17.822		10.08	14.6556
10.08	17.8269		10.08	14.6601
10.07	17.8329		10.08	14.6644
10.07	17.8383		10.08	14.6687
10.08	17.8433		10.08	14.673
10.08	17.8485		10.08	14.6771
10.08	17.8536		10.08	14.6813
10.08	17.8593		10.08	14.6856
10.08	17.8647		10.08	14.6895
10.08	17.8698		10.08	14.6936
10.08	17.8749		10.08	14.6974
10.08	17.8799		10.08	14.7014
10.07	17.8853		10.08	14.7054
10.07	17.8901		10.08	14.7094
10.08	17.8946		10.08	14.7135
10.08	17.8993		10.08	14.7173
10.08	17.904		10.08	14.7212
10.07	17.9093		10.08	14.7249
10.07	17.9142		10.08	14.7285
10.08	17.9184		10.08	14.7324
10.08	17.9231		10.08	14.7359
10.08	17.9276		10.08	14.7395
10.08	17.932		10.08	14.7431
10.08	17.9363		10.07	14.7468
10.08	17.9405		10.08	14.7502
10.08	17.9447		10.08	14.7535
10.07	17.9492		10.08	14.7568
10.08	17.9531		10.08	14.76
10.08	17.9571		10.08	14.7637
10.08	17.961		10.08	14.7672
10.08	17.9651		10.08	14.7704
10.07	17.9695		10.08	14.7736
10.08	17.973		10.08	14.7769
10.08	17.9769		10.08	14.78
10.08	17.9803		10.08	14.7831
10.08	17.9841		10.08	14.7862
10.08	17.9884		10.08	14.7891
10.07	17.9925		10.08	14.7921
10.07	17.996		10.08	14.7953
10.08	17.999		10.08	14.7983
10.08	18.0025		10.08	14.8014
10.08	18.006		10.08	14.8044
10.07	18.0101		10.08	14.8074
10.07	18.0133		10.08	14.8102
10.07	18.0167		10.08	14.8129
10.08	18.0197		10.08	14.8157
10.07	18.0235		10.08	14.8186
10.07	18.0268		10.08	14.8211
10.08	18.0296		10.08	14.8237
10.08	18.033		10.08	14.8265
10.08	18.0364		10.08	14.8292
10.07	18.0403		10.08	14.8319
10.08	18.043		10.08	14.8346
10.08	18.0459		10.08	14.8372
10.08	18.0493		10.08	14.8399
10.08	18.0523		10.08	14.8426
10.08	18.0554		10.08	14.8452
10.07	18.059		10.08	14.8477
10.07	18.0618		10.08	14.8501
10.07	18.0646		10.08	14.8527
10.08	18.0672		10.08	14.8551
10.08	18.07		10.08	14.8574
10.07	18.0732		10.08	14.8598
10.07	18.0758		10.08	14.8624
10.07	18.0784		10.08	14.8647
10.07	18.081		10.08	14.8672
10.07	18.0835		10.08	14.8692
10.07	18.0863		10.08	14.8714
10.07	18.0893		10.08	14.8735
10.07	18.0914		10.08	14.8756
10.07	18.0941		10.08	14.8775
10.07	18.0968		10.08	14.8796
10.08	18.0989		10.08	14.8817
10.08	18.1014		10.08	14.8841
10.08	18.1039		10.08	14.8861
10.08	18.1063		10.08	14.8882
10.08	18.1087		10.08	14.8902
10.08	18.111		10.08	14.892
10.07	18.114		10.08	14.8941
10.07	18.1164		10.08	14.8961
10.08	18.1183		10.08	14.8981
10.08	18.1204		10.08	14.9002
10.07	18.1233		10.08	14.9023
10.07	18.1254		10.08	14.9042
10.07	18.1275		10.08	14.906
10.07	18.1297		10.08	14.908
10.08	18.1314		10.08	14.9098
10.08	18.1335		10.08	14.9118
10.07	18.1363		10.08	14.9135
10.07	18.1383		10.08	14.9153
10.08	18.1399		10.08	14.9169
10.07	18.1423		10.08	14.9186
10.07	18.1444		10.08	14.9204
10.07	18.1465		10.08	14.9221
10.07	18.1485		10.08	14.9239
10.08	18.1498		10.08	14.9255
10.08	18.1517		10.08	14.9275
10.08	18.1536		10.08	14.9293
10.07	18.156		10.08	14.931
10.08	18.1573		10.08	14.9329
10.08	18.1589		10.08	14.9344
10.07	18.1612		10.08	14.9362
10.07	18.1629		10.08	14.9378
10.07	18.1645		10.08	14.9392
10.07	18.166		10.08	14.9409
10.07	18.1677		10.08	14.9422
10.08	18.1689		10.08	14.9437
10.08	18.1705		10.08	14.9452
10.08	18.1723		10.08	14.9466
10.07	18.1746		10.08	14.9479
10.08	18.1759		10.08	14.9493
10.08	18.1776		10.08	14.9508
10.08	18.1791		10.08	14.952
10.07	18.1812		10.08	14.9535
10.07	18.1828		10.08	14.9548
10.07	18.1845		10.08	14.9562
10.07	18.186		10.08	14.9575
10.07	18.1874		10.08	14.9588
10.07	18.1888		10.08	14.9601
10.07	18.1902		10.08	14.9614
10.07	18.192		10.08	14.9629
10.07	18.1935		10.08	14.9642
10.07	18.1951		10.08	14.9656
10.07	18.1966		10.08	14.9667
10.07	18.1977		10.08	14.9681
10.08	18.1985		10.08	14.9696
10.08	18.1999		10.08	14.9709
10.08	18.2012		10.08	14.9722
10.08	18.2027		10.08	14.9733
10.07	18.2043		10.08	14.9746
10.08	18.2051		10.08	14.9757
10.08	18.2062		10.08	14.9769
10.07	18.2077		10.07	14.9782
10.08	18.2087		10.07	14.9794
10.07	18.2105		10.08	14.9804
10.08	18.2113		10.08	14.9814
10.07	18.2131		10.08	14.9826
10.07	18.2143		10.08	14.9837
10.07	18.2156		10.08	14.9849
10.07	18.2168		10.08	14.9859
10.08	18.2176		10.08	14.9868
10.08	18.2187		10.08	14.9878
10.07	18.2204		10.08	14.989
10.07	18.2214		10.08	14.9899
10.07	18.2225		10.08	14.9909
10.08	18.2231		10.08	14.992
10.07	18.2247		10.08	14.9932
10.08	18.2254		10.08	14.9941
10.08	18.2264		10.08	14.9954
10.07	18.2279		10.08	14.9965
10.07	18.229		10.08	14.9973
10.08	18.2295		10.08	14.9985
10.07	18.2311		10.08	14.9994
10.07	18.2322		10.08	15.0005
10.07	18.2333		10.08	15.0012
10.08	18.2338		10.08	15.0022
10.08	18.2345		10.08	15.0031
10.07	18.2362		10.08	15.004
10.07	18.2372		10.08	15.0048
10.07	18.2383		10.08	15.0055
10.07	18.2387		10.08	15.0064
10.07	18.2394		10.08	15.0074
10.07	18.2404		10.08	15.0085
10.07	18.2412		10.08	15.0094
10.07	18.2422		10.08	15.0103
10.07	18.2435		10.08	15.0111
10.07	18.2441		10.08	15.0121
10.08	18.2445		10.08	15.013
10.07	18.2461		10.08	15.0136
10.08	18.2465		10.08	15.0143
10.07	18.2478		10.08	15.0152
10.07	18.2487		10.08	15.016
10.08	18.2492		10.08	15.0168
10.07	18.2507		10.08	15.0177
10.07	18.2517		10.08	15.0184
10.08	18.2521		10.08	15.019
10.07	18.2534		10.08	15.0196
10.07	18.2542		10.08	15.0203
10.08	18.2546		10.08	15.021
10.07	18.2558		10.08	15.0217
10.07	18.2563		10.08	15.0224
10.07	18.2569		10.08	15.023
10.07	18.2576		10.08	15.0236
10.08	18.2579		10.08	15.0244
10.08	18.2587		10.08	15.0252
10.07	18.2598		10.08	15.0259
10.07	18.2607		10.08	15.0265
10.08	18.2608		10.08	15.0273
10.07	18.2618		10.08	15.0279
10.08	18.2619		10.08	15.0285
10.07	18.263		10.08	15.0294
10.07	18.2637		10.08	15.03
10.08	18.2638		10.08	15.0307
10.07	18.265		10.08	15.0315
10.07	18.2658		10.08	15.0322
10.08	18.2661		10.08	15.0328
10.08	18.2662		10.08	15.0336
10.08	18.2671		10.08	15.0343
10.08	18.2677		10.08	15.0347
10.07	18.2688		10.08	15.0352
10.07	18.2699		10.08	15.0358
10.07	18.27		10.08	15.0365
10.07	18.2706		10.08	15.037
10.07	18.2716		10.08	15.0374
10.07	18.2721		10.08	15.0378
10.07	18.2726		10.08	15.0385
10.07	18.2735		10.08	15.0389
10.07	18.2742		10.08	15.0392
10.07	18.2748		10.08	15.0399
10.07	18.2755		10.08	15.0405
10.07	18.2761		10.08	15.0408
10.07	18.2764		10.08	15.0414
10.07	18.2769		10.08	15.0418
10.07	18.2773		10.08	15.0425
10.07	18.2779		10.08	15.0431
10.08	18.2777		10.08	15.0437
10.08	18.2782		10.08	15.0443
10.08	18.2787		10.08	15.0448
10.08	18.2791		10.08	15.0453
10.07	18.2801		10.08	15.0457
10.08	18.2802		10.08	15.0462
10.07	18.281		10.08	15.0469
10.08	18.2809		10.08	15.0473
10.08	18.2814		10.08	15.048
10.07	18.2824		10.08	15.0484
10.07	18.2829		10.08	15.049
10.08	18.2828		10.08	15.0495
10.07	18.2837		10.08	15.05
10.07	18.2843		10.08	15.0506
10.08	18.2845		10.07	15.0511
10.08	18.285		10.08	15.0513
10.07	18.2858		10.08	15.0517
10.07	18.286		10.08	15.0521
10.07	18.2865		10.08	15.0524
10.08	18.2861		10.08	15.0528
10.08	18.287		10.08	15.0532
10.07	18.2879		10.08	15.0538
10.08	18.2877		10.08	15.0542
10.08	18.2882		10.08	15.0547
10.07	18.289		10.08	15.0552
10.08	18.2889		10.08	15.0557
10.08	18.2894		10.08	15.0562
10.08	18.2898		10.08	15.0566
10.08	18.2901		10.08	15.057
10.08	18.2905		10.08	15.0572
10.08	18.291		10.08	15.0576
10.08	18.2914		10.08	15.058
10.08	18.2918		10.08	15.0586
10.07	18.2926		10.08	15.0589
10.08	18.2927		10.07	15.0596
10.07	18.2935		10.07	15.06
10.07	18.2938		10.08	15.0601
10.07	18.2941		10.08	15.0605
10.07	18.2944		10.08	15.0609
10.07	18.2949		10.08	15.0614
10.08	18.2947		10.08	15.0616
10.07	18.2955		10.08	15.0621
10.07	18.2958		10.08	15.0624
10.08	18.2958		10.08	15.0628
10.08	18.2959		10.08	15.0631
10.08	18.2961		10.08	15.0636
10.08	18.2964		10.08	15.0637
10.07	18.2971		10.08	15.0642
10.07	18.2973		10.08	15.0647
10.08	18.2973		10.08	15.065
10.08	18.2976		10.08	15.0653
10.07	18.2983		10.08	15.0655
10.07	18.2986		10.08	15.0657
10.07	18.2989		10.08	15.0662
10.07	18.2991		10.08	15.0664
10.07	18.2995		10.08	15.0668
10.07	18.2997		10.08	15.0672
10.07	18.2998		10.08	15.0673
10.08	18.2993		10.08	15.0678
10.08	18.2997		10.08	15.068
10.08	18.2995		10.08	15.068
10.08	18.3004		10.08	15.0682
10.07	18.3007		10.08	15.0684
10.07	18.3009		10.08	15.0687
10.07	18.3011		10.08	15.0689
10.07	18.3013		10.08	15.0694
10.08	18.3008		10.08	15.0697
10.08	18.3006		10.08	15.07
10.07	18.3019		10.08	15.0704
10.07	18.3022		10.08	15.0706
10.08	18.3021		10.08	15.0711
10.08	18.3026		10.08	15.0712
10.08	18.303		10.08	15.0714
10.07	18.3038		10.08	15.0719
10.07	18.3042		10.08	15.072
10.07	18.3042		10.08	15.0722
10.07	18.3043		10.08	15.0727
10.08	18.3041		10.08	15.0729
10.08	18.3042		10.08	15.073
10.08	18.3044		10.08	15.0733
10.07	18.3051		10.08	15.0735
10.08	18.3047		10.08	15.0739
10.07	18.3053		10.08	15.074
10.07	18.3055		10.08	15.0741
10.08	18.3053		10.08	15.0742
10.08	18.3054		10.08	15.0744
10.08	18.3057		10.08	15.0746
10.07	18.3062		10.08	15.0747
10.07	18.3063		10.08	15.075
10.07	18.3065		10.08	15.0753
10.07	18.3065		10.08	15.0757
10.07	18.3069		10.08	15.0758
10.07	18.3073		10.08	15.0761
10.07	18.3077		10.08	15.0763
10.07	18.3079		10.08	15.0764
10.08	18.3076		10.08	15.0764
10.08	18.3078		10.08	15.0766
10.07	18.3083		10.08	15.0767
10.07	18.3083		10.08	15.0767
10.07	18.3085		10.08	15.0772
10.08	18.308		10.08	15.0775
10.07	18.3087		10.08	15.0775
10.07	18.3089		10.08	15.0778
10.08	18.3087		10.08	15.078
10.08	18.3088		10.08	15.0782
10.07	18.3094		10.08	15.0784
10.07	18.3095		10.07	15.0787
10.07	18.3098		10.08	15.0787
10.08	18.3093		10.08	15.0788
10.08	18.3095		10.08	15.079
10.07	18.3102		10.08	15.079
10.08	18.3099		10.08	15.0793
10.08	18.3101		10.07	15.0797
10.07	18.312		10.08	15.0796
10.07	18.323		10.08	15.0796
10.08	18.3489		10.08	15.0796
10.08	18.3884		10.08	15.0798
10.08	18.4364		10.08	15.0797
10.08	18.488		10.08	15.0798
10.07	18.5398		10.08	15.08
10.08	18.5872		10.08	15.0803
10.08	18.6301		10.08	15.0806
10.08	18.6674		10.08	15.0806
10.09	18.6975		10.08	15.0809
10.1	18.7209		10.08	15.082
10.11	18.7379		10.08	15.0876
10.11	18.7498		10.08	15.101
10.13	18.7559		10.08	15.121
10.13	18.7579		10.08	15.1449
10.14	18.7565		10.08	15.17
10.15	18.7524		10.08	15.1939
10.16	18.7466		10.08	15.2154
10.18	18.7392		10.09	15.2334
10.19	18.7324		10.09	15.2471
10.2	18.726		10.1	15.2563
10.22	18.7209		10.1	15.2612
10.23	18.7177		10.11	15.2617
10.24	18.7169		10.12	15.2585
10.25	18.7189		10.13	15.2521
10.27	18.7241		10.14	15.2431
10.29	18.7326		10.15	15.2322
10.3	18.7455		10.15	15.2199
10.31	18.7627		10.18	15.2068
10.33	18.7834		10.18	15.194
10.35	18.8086		10.19	15.1816
10.36	18.8376		10.2	15.1701
10.38	18.8708		10.22	15.16
10.4	18.9083		10.23	15.1514
10.41	18.9496		10.25	15.1452
10.43	18.9946		10.27	15.1411
10.44	19.0436		10.28	15.1401
10.46	19.0957		10.29	15.1418
10.47	19.1522		10.31	15.1465
10.49	19.211		10.32	15.1544
10.5	19.273		10.34	15.1651
10.52	19.3377		10.35	15.1791
10.54	19.4054		10.37	15.196
10.55	19.4753		10.38	15.2161
10.57	19.5476		10.4	15.239
10.58	19.622		10.41	15.2648
10.6	19.6975		10.43	15.2934
10.62	19.7748		10.45	15.3247
10.63	19.854		10.46	15.3588
10.65	19.9339		10.48	15.3951
10.67	20.0146		10.5	15.4337
10.68	20.0961		10.51	15.4747
10.7	20.1787		10.53	15.5179
10.71	20.2617		10.55	15.5633
10.73	20.3447		10.56	15.6104
10.74	20.4284		10.58	15.6591
10.76	20.5118		10.59	15.7095
10.78	20.5962		10.61	15.7613
10.79	20.6801		10.63	15.8146
10.81	20.764		10.64	15.8693
10.83	20.8479		10.65	15.925
10.84	20.9318		10.67	15.982
10.86	21.0148		10.69	16.0394
10.88	21.0984		10.7	16.0982
10.89	21.1815		10.72	16.1577
10.9	21.2637		10.73	16.218
10.92	21.3455		10.75	16.2791
10.94	21.4262		10.77	16.3411
10.95	21.5066		10.78	16.4036
10.97	21.5864		10.8	16.4667
10.98	21.666		10.82	16.5304
11	21.7444		10.84	16.5948
11.02	21.8233		10.85	16.6598
11.03	21.9014		10.86	16.7252
11.05	21.9782		10.88	16.791
11.06	22.0558		10.89	16.8574
11.08	22.1321		10.91	16.924
11.1	22.2084		10.93	16.9907
11.11	22.2846		10.94	17.0575
11.13	22.3602		10.96	17.1247
11.15	22.4355		10.98	17.1921
11.16	22.5098		10.99	17.2603
11.18	22.5839		11.01	17.3283
11.2	22.6578		11.03	17.3968
11.21	22.731		11.04	17.4658
11.23	22.8044		11.06	17.535
11.25	22.8775		11.07	17.6048
11.26	22.9507		11.09	17.6747
11.28	23.0229		11.1	17.7451
11.3	23.0955		11.12	17.8156
11.31	23.1686		11.13	17.8866
11.33	23.2408		11.15	17.9578
11.34	23.3132		11.17	18.0288
11.36	23.385		11.19	18.1005
11.38	23.4568		11.2	18.1723
11.39	23.5285		11.22	18.2447
11.41	23.5998		11.24	18.3173
11.43	23.6707		11.25	18.3902
11.44	23.7415		11.27	18.4637
11.45	23.8121		11.28	18.5373
11.47	23.8824		11.3	18.6113
11.49	23.9526		11.32	18.6856
11.51	24.0223		11.33	18.7603
11.52	24.0929		11.35	18.8352
11.54	24.1629		11.36	18.9101
11.55	24.2329		11.38	18.9854
11.57	24.3032		11.39	19.0609
11.58	24.3732		11.41	19.1364
11.6	24.4432		11.43	19.2122
11.61	24.5135		11.45	19.288
11.63	24.5832		11.46	19.3637
11.65	24.6526		11.48	19.44
11.67	24.7212		11.49	19.5162
11.68	24.7896		11.51	19.5926
11.7	24.8583		11.53	19.6694
11.72	24.9269		11.54	19.7463
11.73	24.9958		11.56	19.8236
11.75	25.064		11.58	19.9011
11.77	25.1327		11.59	19.9786
11.78	25.2012		11.61	20.0564
11.8	25.2698		11.63	20.1342
11.82	25.3382		11.64	20.212
11.83	25.4066		11.65	20.2901
11.85	25.4755		11.67	20.368
11.86	25.5438		11.69	20.4456
11.88	25.6123		11.7	20.5234
11.9	25.6804		11.72	20.6014
11.91	25.7482		11.74	20.6792
11.93	25.8154		11.75	20.7575
11.95	25.8826		11.77	20.8358
11.96	25.9501		11.79	20.9143
11.98	26.0169		11.8	20.9928
11.99	26.0838		11.82	21.0712
12.01	26.1503		11.84	21.1496
12.03	26.2165		11.85	21.2282
12.04	26.2835		11.87	21.3072
12.06	26.349		11.88	21.3859
12.08	26.4146		11.9	21.4643
12.1	26.4803		11.92	21.543
12.11	26.5458		11.93	21.6215
12.13	26.6105		11.95	21.6995
12.14	26.6759		11.97	21.7774
12.16	26.7408		11.98	21.8553
12.18	26.8046		12	21.9334
12.19	26.869		12.01	22.0113
12.2	26.9327		12.03	22.0889
12.22	26.9958		12.05	22.1666
12.24	27.0587		12.06	22.2441
12.25	27.1225		12.08	22.3214
12.27	27.1863		12.1	22.3987
12.28	27.2495		12.11	22.4759
12.3	27.3129		12.13	22.5531
12.32	27.3761		12.15	22.6298
12.33	27.4392		12.16	22.7066
12.35	27.5019		12.18	22.783
12.37	27.5643		12.2	22.8589
12.39	27.6262		12.21	22.9348
12.4	27.6883		12.23	23.0103
12.42	27.7504		12.24	23.0858
12.43	27.8112		12.25	23.1613
12.45	27.8724		12.27	23.2372
12.47	27.9324		12.29	23.3125
12.48	27.9927		12.31	23.3879
12.5	28.0525		12.33	23.4632
12.52	28.1125		12.34	23.5384
12.53	28.172		12.35	23.6132
12.55	28.232		12.37	23.6882
12.56	28.2911		12.39	23.7626
12.58	28.3496		12.41	23.8368
12.6	28.4079		12.42	23.9111
12.62	28.4668		12.44	23.9847
12.63	28.5249		12.45	24.058
12.65	28.5832		12.47	24.1311
12.66	28.6406		12.49	24.2039
12.68	28.6972		12.51	24.2762
12.7	28.7534		12.52	24.3487
12.71	28.8095		12.53	24.4209
12.73	28.8649		12.55	24.4925
12.75	28.9204		12.58	24.564
12.76	28.9762		12.59	24.6354
12.78	29.0315		12.6	24.7067
12.79	29.0875		12.62	24.7775
12.81	29.1422		12.64	24.8485
12.83	29.1967		12.65	24.919
12.85	29.2515		12.67	24.9891
12.86	29.3058		12.68	25.0586
12.88	29.3603		12.7	25.1274
12.9	29.4137		12.72	25.1963
12.91	29.4674		12.74	25.2649
12.93	29.5207		12.75	25.3335
12.95	29.573		12.77	25.4018
12.96	29.6255		12.78	25.4698
12.97	29.678		12.8	25.5377
12.99	29.7294		12.82	25.6052
13.01	29.7813		12.83	25.6724
13.02	29.8333		12.85	25.7395
13.04	29.8839		12.86	25.8064
13.06	29.9345		12.88	25.8733
13.08	29.9853		12.9	25.9395
13.1	30.0361		12.92	26.0056
13.11	30.0864		12.93	26.0712
13.13	30.1362		12.95	26.1366
13.14	30.1864		12.97	26.2012
13.16	30.2351		12.98	26.2661
13.18	30.2837		13	26.3306
13.19	30.3314		13.02	26.3947
13.21	30.3788		13.03	26.4587
13.23	30.4258		13.04	26.5227
13.25	30.4724		13.06	26.5863
13.26	30.5194		13.08	26.6493
13.28	30.5661		13.09	26.7121
13.29	30.6124		13.11	26.7748
13.31	30.6587		13.13	26.8369
13.32	30.7051		13.15	26.8988
13.34	30.751		13.17	26.9601
13.35	30.7976		13.18	27.0211
13.37	30.8434		13.2	27.0811
13.39	30.8887		13.21	27.1411
13.4	30.9342		13.23	27.2007
13.42	30.9788		13.25	27.2597
13.44	31.0234		13.26	27.3186
13.45	31.0674		13.28	27.3774
13.48	31.1111		13.3	27.4359
13.49	31.155		13.31	27.4944
13.5	31.1988		13.33	27.5527
13.52	31.2418		13.35	27.6106
13.54	31.2846		13.36	27.6684
13.55	31.327		13.38	27.7262
13.57	31.3696		13.4	27.7836
13.59	31.4113		13.41	27.8406
13.61	31.4525		13.43	27.898
13.63	31.4943		13.44	27.9542
13.64	31.5348		13.46	28.0099
13.66	31.5754		13.48	28.0657
13.68	31.6158		13.5	28.1213
13.69	31.6564		13.51	28.1765
13.71	31.6948		13.52	28.2313
13.72	31.7342		13.54	28.2857
13.73	31.7736		13.56	28.3401
13.75	31.8118		13.58	28.3939
13.77	31.8503		13.59	28.4473
13.78	31.8888		13.6	28.5003
13.8	31.927		13.63	28.5533
13.82	31.9651		13.64	28.6058
13.83	32.0027		13.66	28.658
13.85	32.0405		13.67	28.7101
13.87	32.0779		13.69	28.7614
13.88	32.1151		13.71	28.8122
13.9	32.1523		13.73	28.8624
13.92	32.1893		13.74	28.9128
13.93	32.2255		13.75	28.9628
13.95	32.2614		13.77	29.0128
13.97	32.2969		13.79	29.0617
13.98	32.3316		13.81	29.1106
14	32.3668		13.83	29.1598
14.02	32.4021		13.83	29.2091
14.03	32.4372		13.85	29.2575
14.05	32.4722		13.87	29.3062
14.06	32.5077		13.89	29.3546
14.08	32.5417		13.9	29.4029
14.1	32.5763		13.92	29.4507
14.12	32.6109		13.94	29.4978
14.13	32.6454		13.96	29.5441
14.15	32.6793		13.98	29.5905
14.17	32.7127		13.99	29.6366
14.18	32.7457		14	29.6822
14.2	32.7781		14.02	29.7278
14.22	32.8092		14.03	29.7734
14.23	32.8403		14.05	29.8184
14.25	32.8712		14.07	29.8634
14.27	32.902		14.08	29.909
14.29	32.9324		14.1	29.9541
14.3	32.9636		14.12	29.9988
14.32	32.9942		14.14	30.0432
14.33	33.0244		14.15	30.0869
14.35	33.0543		14.17	30.1305
14.37	33.0836		14.18	30.1736
14.38	33.1136		14.2	30.216
14.4	33.1434		14.22	30.2578
14.41	33.1733		14.24	30.2996
14.43	33.2029		14.25	30.3413
14.45	33.2316		14.27	30.3823
14.47	33.2601		14.28	30.4233
14.48	33.2885		14.3	30.4641
14.5	33.3173		14.32	30.5047
14.52	33.3458		14.33	30.5453
14.53	33.374		14.35	30.5855
14.55	33.4025		14.37	30.625
14.57	33.4303		14.38	30.6643
14.58	33.4584		14.4	30.7035
14.6	33.4864		14.42	30.7428
14.61	33.5143		14.43	30.7822
14.63	33.5413		14.45	30.821
14.65	33.5683		14.47	30.8593
14.66	33.5956		14.49	30.8973
14.68	33.6224		14.5	30.9352
14.7	33.6483		14.52	30.9728
14.72	33.6731		14.54	31.0101
14.73	33.6981		14.55	31.0475
14.75	33.723		14.57	31.0847
14.77	33.7468		14.59	31.122
14.78	33.7713		14.6	31.1593
14.8	33.7965		14.62	31.196
14.81	33.8207		14.63	31.233
14.83	33.8452		14.65	31.2691
14.84	33.8697		14.67	31.3048
14.87	33.8932		14.68	31.3399
14.88	33.917		14.7	31.3748
14.9	33.9413		14.72	31.4086
14.91	33.9654		14.73	31.4422
14.93	33.9887		14.75	31.4764
14.94	34.0118		14.77	31.5096
14.96	34.0337		14.78	31.5431
14.98	34.0567		14.8	31.5762
15	34.0786		14.82	31.6099
15.01	34.1003		14.83	31.6426
15.03	34.1227		14.85	31.6754
15.05	34.1447		14.86	31.7082
15.07	34.1665		14.88	31.7405
15.08	34.1883		14.9	31.7724
15.1	34.2106		14.91	31.8047
15.12	34.2326		14.93	31.8366
15.13	34.2547		14.95	31.868
15.15	34.2768		14.97	31.8991
15.16	34.2986		14.98	31.9297
15.18	34.32		15	31.96
15.19	34.3408		15.02	31.9905
15.21	34.3609		15.03	32.0207
15.23	34.3807		15.05	32.0508
15.24	34.4007		15.07	32.0807
15.26	34.4204		15.08	32.1108
15.28	34.4399		15.1	32.1406
15.3	34.4589		15.11	32.1706
15.31	34.4784		15.13	32.2002
15.33	34.4979		15.15	32.2296
15.34	34.5169		15.16	32.2588
15.36	34.5358		15.18	32.288
15.38	34.5549		15.2	32.3164
15.39	34.5731		15.22	32.3448
15.4	34.5921		15.23	32.373
15.43	34.6097		15.25	32.4006
15.44	34.6285		15.27	32.4284
15.46	34.6457		15.28	32.4558
15.48	34.6625		15.3	32.4826
15.49	34.6799		15.31	32.5096
15.51	34.6962		15.33	32.5361
15.53	34.7129		15.34	32.5626
15.55	34.7301		15.36	32.5889
15.56	34.7479		15.38	32.6152
15.58	34.7649		15.39	32.6409
15.59	34.7828		15.41	32.6668
15.61	34.7997		15.43	32.6922
15.63	34.8176		15.45	32.7174
15.64	34.8352		15.46	32.7423
15.66	34.8521		15.48	32.7667
15.67	34.8698		15.5	32.7909
15.69	34.8863		15.51	32.815
15.71	34.9021		15.53	32.8394
15.73	34.9183		15.54	32.8634
15.74	34.9344		15.55	32.8877
15.76	34.9493		15.58	32.9118
15.78	34.9648		15.6	32.9361
15.79	34.98		15.61	32.9599
15.81	34.9949		15.63	32.984
15.81	35.0108		15.64	33.0077
15.83	35.0246		15.66	33.0314
15.85	35.0387		15.68	33.0549
15.88	35.0529		15.69	33.0785
15.89	35.0673		15.71	33.1009
15.91	35.0815		15.73	33.1231
15.93	35.0958		15.74	33.1449
15.94	35.1102		15.76	33.1667
15.96	35.124		15.78	33.1883
15.97	35.1374		15.8	33.2098
15.99	35.1509		15.81	33.2308
16	35.1639		15.83	33.2519
16.02	35.1766		15.84	33.2729
16.04	35.1905		15.86	33.2938
16.05	35.204		15.88	33.3146
16.07	35.2169		15.9	33.3355
16.09	35.2303		15.91	33.3564
16.1	35.2436		15.93	33.3769
16.13	35.2565		15.94	33.3973
16.14	35.2702		15.96	33.4174
16.16	35.2834		15.98	33.4371
16.18	35.2968		15.99	33.4565
16.19	35.3099		16.01	33.4756
16.21	35.3232		16.02	33.4951
16.23	35.3357		16.04	33.5143
16.24	35.348		16.06	33.5335
16.26	35.3598		16.07	33.5526
16.27	35.3724		16.09	33.5718
16.29	35.3839		16.11	33.5909
16.31	35.3958		16.13	33.6099
16.32	35.4076		16.14	33.6292
16.34	35.4192		16.15	33.6481
16.36	35.4308		16.18	33.6669
16.38	35.4428		16.19	33.6857
16.39	35.4547		16.21	33.7039
16.41	35.4659		16.23	33.722
16.43	35.4768		16.24	33.7393
16.44	35.4881		16.26	33.7572
16.45	35.4991		16.27	33.7745
16.47	35.5092		16.29	33.7919
16.49	35.5191		16.31	33.8091
16.51	35.5286		16.32	33.8262
16.52	35.5381		16.34	33.8434
16.54	35.5478		16.36	33.8603
16.55	35.558		16.38	33.8771
16.57	35.5682		16.39	33.8937
16.58	35.5782		16.4	33.91
16.6	35.5879		16.43	33.9264
16.62	35.5978		16.45	33.9423
16.64	35.6082		16.46	33.9586
16.65	35.6185		16.48	33.974
16.67	35.6289		16.49	33.9892
16.69	35.6392		16.5	34.004
16.71	35.6494		16.52	34.0191
16.73	35.6589		16.54	34.034
16.74	35.6686		16.56	34.0489
16.75	35.6785		16.57	34.0637
16.77	35.6874		16.59	34.0789
16.79	35.6975		16.61	34.0937
16.8	35.707		16.63	34.1085
16.82	35.7167		16.64	34.1233
16.83	35.7266		16.65	34.1383
16.85	35.7354		16.67	34.1533
16.87	35.744		16.69	34.1682
16.88	35.7532		16.71	34.183
16.9	35.7624		16.73	34.1978
16.92	35.7702		16.74	34.2124
16.94	35.7782		16.76	34.2264
16.95	35.7873		16.77	34.2404
16.96	35.7959		16.79	34.2545
16.98	35.8029		16.8	34.2681
17	35.8097		16.82	34.2814
17.02	35.8177		16.83	34.2951
17.04	35.8243		16.85	34.308
17.05	35.8317		16.87	34.3214
17.07	35.8394		16.88	34.3343
17.08	35.8471		16.9	34.3471
17.1	35.8552		16.92	34.36
17.12	35.8634		16.93	34.3727
17.13	35.8715		16.95	34.3853
17.15	35.879		16.97	34.3975
17.17	35.8867		16.98	34.4093
17.18	35.8951		17	34.4207
17.2	35.9035		17.02	34.4319
17.22	35.9111		17.04	34.4432
17.23	35.9182		17.05	34.4545
17.25	35.9244		17.07	34.4662
17.27	35.932		17.09	34.4778
17.28	35.939		17.1	34.4897
17.3	35.9457		17.12	34.5016
17.32	35.9526		17.13	34.5137
17.33	35.9602		17.15	34.5259
17.35	35.967		17.17	34.538
17.37	35.974		17.19	34.5499
17.38	35.9809		17.2	34.562
17.4	35.9878		17.21	34.5733
17.41	35.995		17.23	34.5841
17.43	36.002		17.26	34.5949
17.45	36.0089		17.28	34.606
17.47	36.0155		17.29	34.6165
17.49	36.0208		17.3	34.627
17.5	36.0269		17.32	34.638
17.52	36.0329		17.33	34.6485
17.53	36.0383		17.35	34.6595
17.55	36.0441		17.37	34.6708
17.57	36.049		17.38	34.6809
17.58	36.0553		17.4	34.6911
17.59	36.0612		17.42	34.7016
17.61	36.0663		17.44	34.7115
17.63	36.0718		17.45	34.7218
17.65	36.0775		17.47	34.732
17.67	36.0829		17.49	34.741
17.69	36.0886		17.5	34.7504
17.7	36.0947		17.52	34.7597
17.72	36.1011		17.54	34.7686
17.73	36.1062		17.55	34.7776
17.75	36.1111		17.57	34.7864
17.77	36.1169		17.59	34.7952
17.78	36.1225		17.6	34.8042
17.8	36.128		17.62	34.8134
17.82	36.1335		17.64	34.8222
17.83	36.1389		17.65	34.8312
17.85	36.1443		17.68	34.8402
17.87	36.1504		17.69	34.8496
17.88	36.1568		17.7	34.8586
17.9	36.1627		17.72	34.8679
17.92	36.1684		17.74	34.8764
17.93	36.1741		17.75	34.8849
17.95	36.1798		17.77	34.8934
17.96	36.1857		17.79	34.9017
17.98	36.1897		17.8	34.9105
18	36.1936		17.82	34.919
18.02	36.1974		17.84	34.9277
18.04	36.201		17.85	34.9364
18.05	36.2051		17.87	34.9451
18.06	36.2095		17.89	34.9541
18.08	36.2128		17.9	34.9628
18.09	36.2172		17.92	34.9714
18.11	36.221		17.93	34.9801
18.13	36.2247		17.95	34.9881
18.15	36.2283		17.97	34.996
18.17	36.2324		17.98	35.0035
18.19	36.2368		18	35.0106
18.2	36.2414		18.02	35.0175
18.22	36.2466		18.04	35.0239
18.23	36.2511		18.05	35.0306
18.25	36.2552		18.07	35.0373
18.27	36.2595		18.09	35.0439
18.28	36.2637		18.1	35.0507
18.3	36.268		18.12	35.0579
18.32	36.2722		18.14	35.0645
18.33	36.2764		18.15	35.071
18.35	36.2802		18.17	35.078
18.36	36.2848		18.18	35.0853
18.38	36.2893		18.2	35.0921
18.4	36.2934		18.22	35.0996
18.41	36.2974		18.24	35.1068
18.43	36.3014		18.25	35.1137
18.45	36.3055		18.27	35.1205
18.46	36.3101		18.28	35.1273
18.48	36.3139		18.3	35.1337
18.5	36.3172		18.32	35.1402
18.51	36.3204		18.34	35.1471
18.53	36.3233		18.35	35.1539
18.55	36.3262		18.36	35.1603
18.56	36.3291		18.38	35.1669
18.58	36.3322		18.4	35.1734
18.59	36.3355		18.41	35.18
18.61	36.3391		18.43	35.1866
18.63	36.3427		18.45	35.1933
18.65	36.347		18.47	35.1998
18.66	36.3507		18.48	35.2061
18.68	36.3535		18.5	35.2121
18.7	36.3567		18.52	35.2177
18.72	36.3599		18.53	35.223
18.73	36.3629		18.55	35.2283
18.75	36.3651		18.57	35.2336
18.77	36.3675		18.58	35.2389
18.78	36.3702		18.59	35.2446
18.8	36.3723		18.62	35.2495
18.81	36.375		18.63	35.2553
18.83	36.3781		18.65	35.2605
18.85	36.3807		18.67	35.2658
18.87	36.3838		18.68	35.2712
18.88	36.3879		18.7	35.2765
18.89	36.3914		18.72	35.2821
18.91	36.395		18.73	35.2879
18.93	36.3984		18.75	35.2928
18.95	36.4017		18.76	35.2977
18.96	36.4062		18.78	35.3026
18.98	36.4093		18.8	35.3071
19	36.4124		18.82	35.3121
19.02	36.4154		18.83	35.3172
19.03	36.4182		18.85	35.3224
19.05	36.4204		18.87	35.3274
19.07	36.4226		18.88	35.3325
19.08	36.4253		18.9	35.3377
19.1	36.4266		18.92	35.343
19.12	36.4293		18.93	35.3488
19.13	36.4317		18.95	35.3544
19.15	36.4338		18.97	35.3599
19.16	36.4359		18.98	35.3653
19.18	36.4375		19	35.37
19.2	36.4394		19.02	35.3749
19.22	36.4414		19.03	35.379
19.23	36.4435		19.05	35.383
19.25	36.4453		19.07	35.3877
19.27	36.447		19.08	35.392
19.28	36.4493		19.1	35.3958
19.3	36.4514		19.12	35.4
19.31	36.4535		19.13	35.4038
19.33	36.4555		19.15	35.408
19.35	36.4576		19.17	35.4117
19.37	36.4602		19.18	35.4154
19.38	36.4631		19.2	35.4194
19.4	36.4663		19.21	35.4236
19.42	36.4685		19.23	35.4277
19.43	36.4715		19.25	35.431
19.45	36.4745		19.27	35.4346
19.47	36.4778		19.28	35.4381
19.48	36.4806		19.3	35.4415
19.5	36.4827		19.32	35.4451
19.51	36.485		19.33	35.4489
19.53	36.4862		19.35	35.4523
19.55	36.4875		19.37	35.4565
19.57	36.4881		19.39	35.4608
19.58	36.4895		19.4	35.4652
19.59	36.4916		19.42	35.4698
19.61	36.4933		19.43	35.4744
19.63	36.4947		19.45	35.4788
19.65	36.4959		19.47	35.483
19.66	36.4985		19.48	35.4871
19.68	36.4999		19.5	35.491
19.7	36.5026		19.52	35.4944
19.72	36.5047		19.53	35.4978
19.73	36.5067		19.55	35.5008
19.75	36.5084		19.57	35.5036
19.77	36.5089		19.58	35.5068
19.78	36.51		19.6	35.5099
19.8	36.5117		19.62	35.5133
19.82	36.5128		19.64	35.5164
19.83	36.5138		19.65	35.5194
19.85	36.5149		19.67	35.5225
19.87	36.5165		19.68	35.5258
19.89	36.5176		19.7	35.5291
19.9	36.5195		19.72	35.5326
19.92	36.5214		19.74	35.5358
19.93	36.5234		19.75	35.5389
19.95	36.5254		19.76	35.5414
19.96	36.5276		19.78	35.5439
19.98	36.53		19.8	35.546
20	36.5322		19.82	35.5484
20.02	36.5335		19.83	35.5512
20.03	36.5351		19.85	35.5541
20.05	36.5366		19.87	35.5569
20.07	36.538		19.88	35.5596
20.08	36.5396		19.9	35.5627
20.09	36.5421		19.92	35.5658
20.11	36.5437		19.93	35.569
20.13	36.5457		19.95	35.5725
20.15	36.5473		19.97	35.5759
20.17	36.5486		19.99	35.5791
20.18	36.5509		20	35.5828
20.2	36.5524		20.01	35.5855
20.21	36.5536		20.03	35.5883
20.23	36.5551		20.05	35.5911
20.25	36.556		20.06	35.5942
20.26	36.5562		20.08	35.597
20.28	36.5563		20.09	35.5999
20.3	36.5563		20.12	35.6026
20.31	36.5566		20.13	35.6055
20.33	36.5565		20.15	35.608
20.34	36.5566		20.17	35.6105
20.36	36.5571		20.18	35.613
20.38	36.5574		20.2	35.6158
20.4	36.5591		20.22	35.6182
20.41	36.5604		20.23	35.6206
20.43	36.5619		20.25	35.6228
20.45	36.5636		20.27	35.6247
20.46	36.5657		20.28	35.6265
20.48	36.5678		20.3	35.6278
20.5	36.5702		20.31	35.6292
20.51	36.5716		20.33	35.6302
20.53	36.5723		20.35	35.6318
20.55	36.5739		20.37	35.6334
20.56	36.5751		20.38	35.6352
20.58	36.5755		20.4	35.6373
20.59	36.5772		20.42	35.6395
20.61	36.5788		20.43	35.6417
20.63	36.5799		20.45	35.6441
20.65	36.5809		20.46	35.6468
20.66	36.5818		20.48	35.6494
20.68	36.5831		20.5	35.6522
20.7	36.5842		20.52	35.6545
20.72	36.5848		20.53	35.6568
20.73	36.5856		20.55	35.6587
20.75	36.5867		20.57	35.6606
20.76	36.5875		20.58	35.6629
20.78	36.5878		20.6	35.6648
20.8	36.5877		20.62	35.6669
20.82	36.5873		20.63	35.6687
20.83	36.5876		20.65	35.6705
20.85	36.5881		20.67	35.6723
20.87	36.5884		20.68	35.6746
20.88	36.5893		20.7	35.6769
20.9	36.5898		20.71	35.679
20.91	36.5912		20.73	35.6811
20.93	36.592		20.75	35.6833
20.95	36.5935		20.77	35.685
20.97	36.5942		20.78	35.6862
20.98	36.5962		20.8	35.6869
21	36.5976		20.82	35.6882
21.02	36.5986		20.83	35.6891
21.03	36.5992		20.84	35.6903
21.05	36.5999		20.87	35.6912
21.07	36.6005		20.88	35.6926
21.08	36.6012		20.9	35.6941
21.1	36.6019		20.92	35.6955
21.11	36.6032		20.93	35.6976
21.13	36.604		20.95	35.6994
21.15	36.605		20.96	35.7021
21.17	36.6057		20.98	35.7041
21.18	36.6072		21	35.706
21.2	36.6082		21.01	35.708
21.22	36.6097		21.03	35.709
21.23	36.6104		21.05	35.7104
21.25	36.6111		21.07	35.7116
21.26	36.6117		21.08	35.7132
21.28	36.6114		21.1	35.7147
21.3	36.611		21.12	35.7163
21.32	36.6107		21.13	35.7179
21.33	36.61		21.15	35.7196
21.34	36.6106		21.17	35.7215
21.37	36.6102		21.18	35.7233
21.38	36.6104		21.2	35.7246
21.4	36.6106		21.22	35.7267
21.42	36.6108		21.23	35.7284
21.43	36.6114		21.25	35.7301
21.45	36.6119		21.26	35.7316
21.47	36.6128		21.29	35.7321
21.48	36.6139		21.3	35.7333
21.49	36.6151		21.32	35.7337
21.51	36.6153		21.33	35.7343
21.53	36.6159		21.35	35.7349
21.54	36.617		21.37	35.7357
21.56	36.6168		21.38	35.7367
21.58	36.6171		21.4	35.7371
21.59	36.6181		21.42	35.7382
21.61	36.619		21.43	35.7396
21.63	36.6199		21.45	35.7407
21.64	36.6217		21.47	35.7423
21.66	36.6224		21.48	35.7437
21.68	36.6236		21.5	35.745
21.7	36.6245		21.52	35.7463
21.71	36.6261		21.53	35.747
21.73	36.627		21.55	35.7483
21.75	36.6273		21.56	35.7491
21.76	36.6279		21.58	35.7502
21.78	36.6283		21.6	35.751
21.8	36.6276		21.62	35.7525
21.81	36.6278		21.63	35.7545
21.82	36.6277		21.65	35.7558
21.85	36.6265		21.66	35.7576
21.87	36.6266		21.68	35.7592
21.88	36.6263		21.7	35.7612
21.9	36.627		21.71	35.7627
21.91	36.6273		21.73	35.7642
21.93	36.6269		21.75	35.7653
21.95	36.6271		21.76	35.7663
21.97	36.627		21.78	35.7668
21.98	36.628		21.8	35.767
22	36.6287		21.81	35.7673
22.01	36.6294		21.83	35.7672
22.03	36.6294		21.84	35.7674
22.05	36.6293		21.86	35.7679
22.06	36.6291		21.88	35.7685
22.08	36.6292		21.9	35.7691
22.09	36.63		21.91	35.7701
22.11	36.6303		21.93	35.7708
22.13	36.6306		21.95	35.7716
22.15	36.6309		21.96	35.7729
22.17	36.6315		21.98	35.774
22.18	36.6325		22	35.7748
22.2	36.6338		22.02	35.7758
22.22	36.6341		22.03	35.7767
22.23	36.6348		22.05	35.7772
22.25	36.6355		22.06	35.7778
22.27	36.6361		22.08	35.7783
22.28	36.6365		22.09	35.7792
22.29	36.6369		22.11	35.7802
22.31	36.6366		22.13	35.781
22.33	36.6363		22.15	35.7818
22.34	36.636		22.17	35.7826
22.36	36.6364		22.18	35.7838
22.38	36.6362		22.2	35.785
22.4	36.6365		22.22	35.7868
22.42	36.6364		22.23	35.7882
22.43	36.637		22.25	35.789
22.45	36.6373		22.27	35.79
22.47	36.6369		22.28	35.7911
22.48	36.637		22.3	35.7919
22.5	36.637		22.31	35.7919
22.51	36.6378		22.33	35.7921
22.53	36.6375		22.34	35.7921
22.54	36.6372		22.36	35.7926
22.56	36.636		22.38	35.7928
22.58	36.6353		22.4	35.7932
22.59	36.6358		22.41	35.7937
22.61	36.6357		22.43	35.7944
22.63	36.6355		22.45	35.7949
22.65	36.6363		22.46	35.7956
22.67	36.6372		22.48	35.7961
22.68	36.6385		22.5	35.7965
22.7	36.6389		22.51	35.7971
22.71	36.6401		22.53	35.7969
22.73	36.641		22.55	35.7969
22.74	36.6425		22.57	35.7969
22.76	36.6432		22.58	35.797
22.78	36.6437		22.59	35.7976
22.79	36.6439		22.62	35.7981
22.81	36.6434		22.63	35.7987
22.83	36.6432		22.65	35.7999
22.84	36.6438		22.66	35.8006
22.87	36.6428		22.68	35.8016
22.88	36.6431		22.7	35.8022
22.9	36.6428		22.72	35.8035
22.91	36.6424		22.73	35.8047
22.93	36.6425		22.75	35.8061
22.95	36.6424		22.76	35.8073
22.96	36.6432		22.78	35.808
22.98	36.6423		22.8	35.8083
22.99	36.6426		22.81	35.8086
23.01	36.6425		22.83	35.8086
23.03	36.6419		22.84	35.8087
23.04	36.6412		22.86	35.8089
23.06	36.6403		22.88	35.8091
23.07	36.6398		22.9	35.8092
23.09	36.6397		22.91	35.8095
23.11	36.6399		22.94	35.8098
23.12	36.6401		22.95	35.8104
23.14	36.6397		22.96	35.8104
23.16	36.64		22.98	35.811
23.18	36.6403		23	35.8113
23.2	36.641		23.01	35.8114
23.21	36.642		23.03	35.811
23.22	36.6433		23.05	35.8108
23.24	36.644		23.06	35.8105
23.25	36.645		23.08	35.8105
23.28	36.6448		23.09	35.8106
23.3	36.6444		23.11	35.8106
23.31	36.6442		23.13	35.8114
23.32	36.6444		23.15	35.8124
23.34	36.6439		23.16	35.8132
23.36	36.6439		23.18	35.8139
23.38	36.6437		23.19	35.815
23.39	36.6437		23.21	35.8165
23.41	36.6431		23.23	35.8176
23.43	36.6433		23.25	35.8185
23.45	36.6434		23.26	35.8193
23.46	36.6438		23.28	35.8197
23.48	36.6432		23.3	35.8194
23.5	36.6438		23.31	35.8191
23.51	36.644		23.32	35.8192
23.53	36.6438		23.34	35.8188
23.54	36.6436		23.36	35.8188
23.56	36.6422		23.38	35.8189
23.58	36.6415		23.4	35.8191
23.59	36.6414		23.41	35.8193
23.61	36.6406		23.43	35.8198
23.63	36.6397		23.44	35.8206
23.65	36.6402		23.46	35.8209
23.66	36.6408		23.48	35.8215
23.68	36.6409		23.5	35.8214
23.69	36.6417		23.51	35.8218
23.71	36.642		23.53	35.8219
23.73	36.6425		23.55	35.8217
23.74	36.6434		23.56	35.8214
23.76	36.6442		23.58	35.8207
23.78	36.6445		23.59	35.8209
23.8	36.6439		23.61	35.8207
23.81	36.6437		23.63	35.8207
23.83	36.6436		23.64	35.8204
23.84	36.6441		23.66	35.8207
23.86	36.6441		23.68	35.8209
23.88	36.644		23.69	35.8213
23.9	36.6443		23.71	35.8216
23.91	36.6444		23.73	35.8221
23.92	36.6455		23.74	35.8228
23.94	36.6449		23.76	35.8236
23.96	36.6455		23.78	35.8239
23.98	36.6455		23.8	35.8238
23.99	36.6458		23.81	35.824
24.01	36.6457		23.83	35.8245
24.03	36.6459		23.85	35.8248
24.04	36.6455		23.86	35.8251
24.06	36.6446		23.88	35.8257
24.08	36.6432		23.9	35.826
24.1	36.6418		23.91	35.8262
24.11	36.6414		23.93	35.8264
24.13	36.6409		23.95	35.8271
24.15	36.6402		23.96	35.8276
24.16	36.6399		23.98	35.8281
24.18	36.6392		23.99	35.8285
24.2	36.6396		24	35.8287
24.21	36.6398		24.03	35.8286
24.23	36.6397		24.05	35.8279
24.25	36.6406		24.06	35.8275
24.26	36.6413		24.08	35.8268
24.28	36.6415		24.1	35.8263
24.3	36.6415		24.11	35.8259
24.31	36.6419		24.13	35.8259
24.33	36.6418		24.15	35.8254
24.34	36.642		24.16	35.8253
24.36	36.6419		24.18	35.825
24.38	36.6422		24.2	35.8254
24.39	36.6432		24.21	35.8261
24.41	36.6433		24.23	35.827
24.43	36.6432		24.25	35.8279
24.44	36.6438		24.27	35.8285
24.46	36.6439		24.28	35.829
24.48	36.6442		24.3	35.8291
24.49	36.6445		24.31	35.8291
24.51	36.6441		24.32	35.8291
24.53	36.6438		24.35	35.829
24.54	36.6434		24.37	35.8288
24.55	36.6425		24.38	35.8293
24.57	36.6411		24.4	35.8299
24.59	36.6406		24.41	35.8302
24.6	36.6396		24.43	35.8308
24.62	36.639		24.45	35.8312
24.64	36.6389		24.46	35.8316
24.65	36.6383		24.48	35.8319
24.67	36.6387		24.5	35.8317
24.69	36.6377		24.51	35.8319
24.7	36.6382		24.53	35.8315
24.73	36.6382		24.54	35.8312
24.74	36.639		24.56	35.8306
24.76	36.6396		24.57	35.8299
24.78	36.6403		24.59	35.83
24.8	36.6399		24.61	35.8294
24.81	36.6396		24.63	35.8289
24.82	36.6391		24.64	35.8286
24.84	36.6389		24.66	35.8284
24.85	36.6389		24.68	35.8288
24.87	36.6389		24.69	35.8291
24.89	36.6384		24.71	35.8293
24.91	36.6385		24.73	35.8299
24.93	36.6391		24.74	35.8302
24.94	36.6393		24.76	35.8304
24.96	36.64		24.78	35.8306
24.98	36.6403		24.8	35.8304
24.99	36.6411		24.81	35.83
25	36.6417		24.82	35.8299
25.03	36.6411		24.84	35.8303
25.04	36.6407		24.85	35.8304
25.05	36.6405		24.88	35.8304
25.07	36.6402		24.89	35.8307
25.09	36.6391		24.91	35.8308
25.11	36.6384		24.93	35.8312
25.13	36.6381		24.95	35.8314
25.14	36.6377		24.96	35.8317
25.16	36.6377		24.98	35.832
25.17	36.6375		24.99	35.8322
25.19	36.6372		25	35.833
25.21	36.6367		25.03	35.8328
25.22	36.6372		25.04	35.8324
25.24	36.6369		25.06	35.8318
25.26	36.6365		25.07	35.8312
25.28	36.6364		25.09	35.8307
25.29	36.6359		25.11	35.8306
25.3	36.6361		25.13	35.8301
25.32	36.6359		25.15	35.8295
25.34	36.6358		25.16	35.8289
25.36	36.6355		25.18	35.8286
25.38	36.6353		25.19	35.8282
25.39	36.6356		25.21	35.8282
25.4	36.6361		25.23	35.8282
25.43	36.6361		25.24	35.8282
25.44	36.6362		25.26	35.8283
25.46	36.6372		25.28	35.8284
25.48	36.6379		25.29	35.828
25.49	36.6381		25.31	35.8273
25.51	36.6387		25.32	35.8267
25.52	36.6394		25.34	35.8266
25.54	36.6386		25.36	35.8265
25.56	36.6378		25.38	35.8264
25.57	36.6377		25.4	35.8265
25.59	36.6369		25.41	35.827
25.61	36.6356		25.43	35.8279
25.63	36.6348		25.44	35.8287
25.64	36.6341		25.46	35.8297
25.66	36.6333		25.48	35.83
25.68	36.6326		25.49	35.831
25.69	36.6322		25.51	35.8314
25.7	36.6323		25.53	35.8317
25.72	36.6319		25.54	35.8314
25.74	36.632		25.56	35.8307
25.76	36.6314		25.57	35.8306
25.78	36.6317		25.59	35.8299
25.79	36.6314		25.61	35.8296
25.81	36.631		25.63	35.8288
25.82	36.631		25.65	35.8282
25.84	36.6304		25.66	35.8272
25.86	36.6297		25.68	35.8265
25.88	36.6298		25.69	35.8265
25.89	36.6301		25.71	35.8263
25.91	36.6303		25.73	35.8261
25.93	36.6307		25.75	35.8259
25.94	36.6315		25.76	35.8263
25.96	36.6315		25.78	35.8267
25.98	36.6323		25.79	35.8261
25.99	36.6334		25.8	35.8259
26.01	36.6336		25.82	35.8251
26.02	36.6345		25.84	35.8245
26.04	36.6337		25.86	35.8245
26.06	36.6324		25.88	35.8239
26.07	36.632		25.89	35.8242
26.09	36.6324		25.91	35.8239
26.1	36.6317		25.93	35.8243
26.12	36.6313		25.94	35.8252
26.14	36.6303		25.96	35.8258
26.16	36.6301		25.98	35.8262
26.17	36.6306		25.99	35.8269
26.18	36.6306		26.01	35.8276
26.2	36.6307		26.03	35.8281
26.22	36.6302		26.05	35.8278
26.24	36.6303		26.06	35.8277
26.25	36.6308		26.07	35.8278
26.27	36.63		26.09	35.8272
26.29	36.6289		26.11	35.8265
26.3	36.6278		26.13	35.8263
26.32	36.6268		26.14	35.8258
26.33	36.6261		26.16	35.8249
26.35	36.6251		26.17	35.8249
26.37	36.6248		26.19	35.8247
26.38	36.6247		26.2	35.8245
26.4	36.625		26.22	35.8243
26.42	36.6248		26.24	35.8238
26.44	36.6245		26.26	35.8234
26.45	36.6248		26.28	35.8231
26.47	36.6252		26.29	35.8224
26.49	36.6257		26.3	35.8216
26.5	36.6264		26.32	35.8209
26.52	36.6267		26.34	35.8208
26.54	36.6269		26.35	35.8204
26.55	36.6272		26.38	35.8201
26.57	36.6276		26.39	35.82
26.59	36.6267		26.41	35.8199
26.6	36.6271		26.43	35.8199
26.62	36.6269		26.44	35.8206
26.64	36.6269		26.46	35.8209
26.65	36.6265		26.47	35.8216
26.68	36.6261		26.49	35.8221
26.69	36.6261		26.5	35.8227
26.7	36.626		26.53	35.8228
26.72	36.6258		26.54	35.8231
26.73	36.6256		26.55	35.823
26.75	36.6251		26.57	35.8229
26.77	36.6247		26.59	35.8227
26.79	36.6232		26.61	35.8223
26.8	36.6219		26.63	35.8223
26.82	36.6208		26.64	35.8223
26.84	36.62		26.65	35.8223
26.85	36.619		26.67	35.8221
26.87	36.6188		26.68	35.8219
26.88	36.6183		26.7	35.8218
26.9	36.6178		26.72	35.8216
26.92	36.618		26.74	35.8215
26.94	36.6183		26.75	35.8211
26.95	36.6188		26.77	35.8207
26.97	36.6199		26.79	35.8195
26.98	36.6203		26.8	35.8184
27	36.6212		26.82	35.8172
27.02	36.6215		26.84	35.8163
27.03	36.6218		26.85	35.8156
27.05	36.6214		26.87	35.8154
27.07	36.6213		26.89	35.8151
27.09	36.6213		26.91	35.8146
27.1	36.6214		26.93	35.8151
27.12	36.6215		26.94	35.8154
27.14	36.6214		26.95	35.8159
27.15	36.6212		26.97	35.8163
27.17	36.6212		26.99	35.8168
27.18	36.621		27	35.8173
27.2	36.621		27.02	35.8176
27.22	36.6209		27.04	35.8174
27.24	36.6207		27.06	35.8172
27.25	36.6204		27.07	35.817
27.27	36.6201		27.09	35.8172
27.28	36.6193		27.1	35.8174
27.3	36.618		27.12	35.8175
27.32	36.6167		27.14	35.8173
27.34	36.6162		27.16	35.817
27.35	36.6159		27.18	35.8171
27.38	36.6147		27.19	35.817
27.39	36.615		27.21	35.8171
27.4	36.6148		27.22	35.8174
27.42	36.6145		27.24	35.8173
27.44	36.6145		27.26	35.8174
27.46	36.6143		27.28	35.8174
27.47	36.615		27.29	35.8166
27.49	36.6153		27.31	35.8159
27.5	36.6157		27.32	35.815
27.52	36.616		27.34	35.8143
27.54	36.6153		27.35	35.8135
27.55	36.6147		27.38	35.8128
27.57	36.6147		27.39	35.8122
27.59	36.6141		27.4	35.8119
27.6	36.6142		27.42	35.8116
27.62	36.6148		27.44	35.8115
27.63	36.615		27.45	35.8115
27.65	36.6155		27.48	35.8117
27.66	36.6163		27.5	35.8119
27.68	36.6163		27.51	35.8122
27.7	36.6164		27.53	35.8117
27.72	36.617		27.54	35.8113
27.74	36.6167		27.56	35.8109
27.75	36.6173		27.57	35.8105
27.77	36.6175		27.59	35.8103
27.78	36.6172		27.61	35.8102
27.8	36.6162		27.62	35.8104
27.82	36.6151		27.64	35.8106
27.84	36.6142		27.65	35.8108
27.85	36.6132		27.67	35.8108
27.87	36.6125		27.69	35.8105
27.88	36.612		27.7	35.8107
27.9	36.6108		27.72	35.8106
27.92	36.6101		27.74	35.8106
27.93	36.61		27.75	35.811
27.95	36.6096		27.77	35.8108
27.97	36.6093		27.78	35.8105
27.99	36.6095		27.8	35.8098
28	36.6098		27.82	35.809
28.02	36.6095		27.83	35.8082
28.04	36.6095		27.85	35.8074
28.05	36.6095		27.87	35.8068
28.07	36.6095		27.88	35.8064
28.08	36.6095		27.9	35.8057
28.1	36.6094		27.92	35.8052
28.12	36.6098		27.94	35.805
28.14	36.6095		27.95	35.8047
28.15	36.6105		27.98	35.8048
28.17	36.6113		27.99	35.8047
28.18	36.6122		28	35.8046
28.2	36.6131		28.02	35.8047
28.22	36.6131		28.04	35.8042
28.23	36.6139		28.05	35.8039
28.25	36.614		28.07	35.8037
28.27	36.6133		28.09	35.804
28.29	36.612		28.1	35.8045
28.3	36.6114		28.12	35.8047
28.32	36.6107		28.14	35.8048
28.34	36.6092		28.15	35.8054
28.35	36.6083		28.17	35.8062
28.37	36.6073		28.19	35.8065
28.39	36.6065		28.2	35.8074
28.4	36.606		28.22	35.8081
28.42	36.6055		28.23	35.8084
28.44	36.6051		28.25	35.8084
28.45	36.6054		28.27	35.8086
28.47	36.6055		28.29	35.8078
28.49	36.6055		28.3	35.8068
28.5	36.6056		28.32	35.8058
28.52	36.6061		28.34	35.8049
28.54	36.6054		28.36	35.8043
28.55	36.6049		28.37	35.8039
28.57	36.6045		28.39	35.8035
28.59	36.6045		28.4	35.8026
28.6	36.6049		28.42	35.8023
28.62	36.6046		28.44	35.802
28.64	36.6045		28.45	35.8018
28.65	36.6047		28.48	35.8011
28.67	36.6051		28.49	35.8014
28.68	36.6059		28.51	35.8011
28.7	36.6065		28.52	35.8009
28.72	36.6075		28.54	35.8006
28.74	36.6078		28.55	35.8001
28.75	36.6082		28.57	35.8003
28.77	36.6083		28.59	35.7999
28.79	36.6081		28.6	35.7997
28.8	36.6074		28.62	35.7999
28.82	36.6067		28.64	35.8001
28.84	36.6061		28.65	35.8003
28.85	36.6054		28.67	35.8007
28.87	36.6048		28.68	35.8012
28.89	36.6048		28.71	35.8012
28.9	36.6042		28.73	35.8016
28.91	36.6049		28.74	35.8023
28.93	36.6043		28.75	35.8029
28.95	36.6042		28.77	35.8029
28.97	36.6041		28.79	35.8026
28.99	36.6035		28.81	35.8024
29	36.6038		28.82	35.8017
29.02	36.6028		28.84	35.8015
29.04	36.6016		28.86	35.8012
29.05	36.6003		28.87	35.8003
29.07	36.5996		28.89	35.8
29.09	36.599		28.9	35.7999
29.11	36.5979		28.92	35.7995
29.12	36.5984		28.94	35.7992
29.14	36.5987		28.96	35.7989
29.16	36.5988		28.98	35.7986
29.17	36.5997		28.99	35.7983
29.18	36.6003		29	35.7979
29.2	36.6007		29.02	35.7975
29.22	36.6017		29.04	35.7967
29.23	36.6027		29.05	35.7961
29.25	36.6041		29.07	35.7955
29.26	36.604		29.09	35.7951
29.28	36.6035		29.11	35.7947
29.3	36.6028		29.12	35.7947
29.32	36.6026		29.14	35.7947
29.33	36.6029		29.15	35.7949
29.35	36.6022		29.17	35.7952
29.37	36.6024		29.19	35.7956
29.38	36.602		29.2	35.7958
29.4	36.6017		29.22	35.7965
29.42	36.6008		29.24	35.7969
29.44	36.6		29.25	35.7973
29.45	36.5998		29.27	35.7977
29.47	36.5994		29.28	35.7975
29.48	36.5985		29.3	35.7973
29.5	36.5981		29.32	35.7967
29.52	36.5975		29.34	35.7968
29.53	36.5965		29.35	35.797
29.55	36.5954		29.37	35.7968
29.56	36.5952		29.39	35.7967
29.58	36.5943		29.4	35.7967
29.59	36.5941		29.42	35.7964
29.62	36.5935		29.44	35.7962
29.63	36.5934		29.46	35.7958
29.65	36.5934		29.48	35.7953
29.67	36.5938		29.49	35.795
29.69	36.5942		29.5	35.7943
29.7	36.5948		29.52	35.7933
29.72	36.5959		29.54	35.7921
29.73	36.5969		29.55	35.791
29.75	36.5976		29.57	35.7902
29.77	36.5973		29.58	35.7898
29.78	36.5976		29.6	35.7895
29.8	36.5958		29.62	35.7891
29.82	36.5936		29.63	35.7896
29.84	36.5926		29.65	35.7896
29.85	36.5923		29.67	35.7902
29.87	36.5928		29.69	35.7907
29.88	36.5932		29.7	35.7913
29.9	36.5934		29.72	35.792
29.92	36.594		29.73	35.7927
29.94	36.595		29.76	35.7934
29.95	36.596		29.77	35.7937
29.97	36.5971		29.78	35.7938
29.99	36.5984		29.8	35.7936
30	36.5988		29.82	35.7932
30.02	36.599		29.84	35.7931
30.03	36.5992		29.86	35.7929
30.05	36.599		29.88	35.7933
30.07	36.5978		29.89	35.7934
30.08	36.5975		29.9	35.7938
30.1	36.5968		29.92	35.7939
30.12	36.5956		29.94	35.7944
30.14	36.5953		29.95	35.7948
30.15	36.595		29.98	35.7949
30.17	36.5957		29.99	35.7951
30.18	36.5955		30	35.7951
30.2	36.595		30.02	35.7947
30.22	36.5947		30.03	35.7945
30.24	36.5944		30.05	35.7937
30.25	36.5942		30.07	35.7925
30.27	36.594		30.09	35.7923
30.29	36.5931		30.1	35.792
30.3	36.5926		30.13	35.7916
30.32	36.5919		30.14	35.7912
30.34	36.5917		30.16	35.7907
30.36	36.5907		30.18	35.7904
30.37	36.5905		30.19	35.7901
30.39	36.5901		30.21	35.7899
30.4	36.5903		30.23	35.7895
30.42	36.5907		30.24	35.7892
30.44	36.591		30.26	35.7892
30.46	36.5914		30.27	35.789
30.47	36.5924		30.29	35.7887
30.49	36.593		30.31	35.7881
30.51	36.5925		30.32	35.7879
30.53	36.5923		30.34	35.788
30.54	36.5919		30.35	35.7878
30.55	36.592		30.38	35.7873
30.57	36.5914		30.39	35.7881
30.59	36.5913		30.41	35.7883
30.6	36.5912		30.43	35.7888
30.62	36.5907		30.44	35.789
30.64	36.5902		30.46	35.7891
30.66	36.5903		30.48	35.7892
30.67	36.5913		30.5	35.7892
30.69	36.5911		30.51	35.789
30.7	36.5912		30.53	35.7886
30.73	36.5909		30.54	35.7879
30.74	36.5915		30.55	35.7873
30.75	36.592		30.57	35.7866
30.77	36.5919		30.59	35.7861
30.78	36.5919		30.61	35.7854
30.8	36.5917		30.63	35.7849
30.82	36.5918		30.64	35.7848
30.84	36.5915		30.66	35.7846
30.85	36.5918		30.68	35.7844
30.87	36.5923		30.69	35.7842
30.88	36.5926		30.71	35.7845
30.9	36.5926		30.73	35.7842
30.92	36.5935		30.74	35.7849
30.93	36.5947		30.75	35.7848
30.95	36.5951		30.77	35.785
30.97	36.5954		30.79	35.7849
30.99	36.5953		30.81	35.7846
31	36.5955		30.82	35.7848
31.02	36.595		30.84	35.7847
31.04	36.5943		30.85	35.7852
31.05	36.5945		30.87	35.7858
31.07	36.5931		30.89	35.7861
31.08	36.5941		30.9	35.7867
31.1	36.5919		30.93	35.7871
31.13	36.5924		30.94	35.7878
31.14	36.5916		30.95	35.7886
31.15	36.592		30.97	35.7887
31.17	36.5929		30.99	35.7885
31.19	36.5926		31	35.7884
31.2	36.5911		31.02	35.7877
31.22	36.5934		31.04	35.7869
31.23	36.5951		31.06	35.7864
31.25	36.5944		31.07	35.7859
31.27	36.5939		31.09	35.7855
31.28	36.5934		31.11	35.7852
31.3	36.5914		31.12	35.7849
31.32	36.5898		31.14	35.7844
31.34	36.5899		31.15	35.7842
31.35	36.5912		31.18	35.7837
31.37	36.5918		31.19	35.7839
31.39	36.5924		31.2	35.7839
31.4	36.5907		31.23	35.7845
31.42	36.5924		31.24	35.7851
31.44	36.5923		31.26	35.7851
31.45	36.5933		31.28	35.7849
31.47	36.5926		31.29	35.7848
31.49	36.593		31.3	35.7848
31.51	36.592		31.32	35.7844
31.52	36.5921		31.34	35.7842
31.54	36.5916		31.36	35.7847
31.55	36.5912		31.38	35.7851
31.57	36.5899		31.39	35.7851
31.59	36.5898		31.41	35.7854
31.61	36.5891		31.43	35.7862
31.63	36.5887		31.44	35.786
31.64	36.5891		31.45	35.7874
31.65	36.5891		31.47	35.787
31.68	36.5884		31.49	35.7875
31.69	36.589		31.51	35.7877
31.71	36.5884		31.52	35.7866
31.73	36.5884		31.54	35.7849
31.74	36.589		31.56	35.7862
31.75	36.5891		31.57	35.7859
31.78	36.5877		31.59	35.7847
31.79	36.5867		31.61	35.7849
31.8	36.5861		31.63	35.7848
31.82	36.5861		31.64	35.7847
31.84	36.5853		31.66	35.7844
31.86	36.585		31.68	35.7841
31.87	36.5852		31.69	35.7839
31.89	36.5852		31.71	35.7852
31.9	36.5854		31.73	35.7843
31.93	36.5857		31.74	35.7835
31.95	36.5859		31.76	35.7845
31.96	36.587		31.78	35.7841
31.97	36.5882		31.79	35.7825
31.99	36.5888		31.81	35.7832
32.01	36.5888		31.82	35.782
32.02	36.5891		31.84	35.7819
32.04	36.5882		31.86	35.7814
32.06	36.5877		31.88	35.7815
32.08	36.5877		31.89	35.7815
32.09	36.5872		31.91	35.782
32.11	36.5868		31.93	35.7815
32.12	36.5875		31.95	35.7817
32.14	36.5872		31.96	35.7826
32.16	36.5863		31.98	35.7828
32.17	36.5865		31.99	35.7833
32.19	36.5858		32.01	35.7837
32.22	36.5843		32.02	35.7835
32.23	36.5845		32.04	35.7836
32.24	36.5847		32.06	35.7832
32.25	36.5846		32.08	35.783
32.27	36.5838		32.09	35.783
32.29	36.5827		32.11	35.783
32.3	36.5817		32.13	35.7828
32.32	36.581		32.15	35.7825
32.34	36.5797		32.16	35.7825
32.35	36.5795		32.17	35.7822
32.37	36.5796		32.19	35.7821
32.38	36.5804		32.21	35.7822
32.4	36.5806		32.23	35.7823
32.42	36.5815		32.24	35.7822
32.43	36.5823		32.25	35.7818
32.45	36.5828		32.27	35.7811
32.47	36.5834		32.29	35.7803
32.49	36.5831		32.31	35.7798
32.5	36.5831		32.32	35.7795
32.52	36.5832		32.33	35.7795
32.54	36.5827		32.35	35.7792
32.55	36.5818		32.37	35.7793
32.57	36.5814		32.39	35.7795
32.59	36.5801		32.4	35.7797
32.61	36.5797		32.42	35.7802
32.62	36.5801		32.44	35.7806
32.64	36.5793		32.46	35.7812
32.65	36.58		32.47	35.7814
32.67	36.5795		32.49	35.7813
32.69	36.5789		32.5	35.781
32.7	36.5792		32.52	35.7803
32.72	36.5798		32.54	35.7805
32.74	36.5794		32.56	35.7802
32.75	36.5786		32.58	35.78
32.77	36.5779		32.59	35.78
32.79	36.5772		32.61	35.78
32.81	36.576		32.63	35.7792
32.83	36.5751		32.64	35.7783
32.84	36.575		32.66	35.7778
32.86	36.5743		32.67	35.7778
32.87	36.5749		32.69	35.7778
32.89	36.5744		32.71	35.7775
32.9	36.5746		32.73	35.7773
32.92	36.5754		32.74	35.7774
32.93	36.5762		32.76	35.7768
32.95	36.5758		32.77	35.7767
32.97	36.5759		32.79	35.7762
32.98	36.5764		32.81	35.7756
33	36.576		32.82	35.775
33.02	36.5754		32.84	35.7744
33.04	36.5746		32.86	35.774
33.05	36.574		32.88	35.774
33.07	36.5743		32.89	35.7741
33.08	36.574		32.9	35.7738
33.1	36.5734		32.92	35.7739
33.12	36.5737		32.94	35.7741
33.14	36.5737		32.96	35.7741
[truncated: 5,219 more rows]

## Sheet: Fig 2b
	ASPP, pH2	PP,pH2		ASPP, pH2	PP,pH2
nm	CPS	CPS
307	1015640	3178200		1.01564	3.1782
308	1043590	3200080		1.04359	3.20008
309	1070400	3243590		1.0704	3.24359
310	1118890	3344500		1.11889	3.3445
311	1177390	3489460		1.17739	3.48946
312	1251050	3617100		1.25105	3.6171
313	1322090	3759700		1.32209	3.7597
314	1387940	3920600		1.38794	3.9206
315	1473600	4075710		1.4736	4.07571
316	1531560	4223680		1.53156	4.22368
317	1614540	4370300		1.61454	4.3703
318	1689570	4516330		1.68957	4.51633
319	1771390	4648730		1.77139	4.64873
320	1849400	4807450		1.8494	4.80745
321	1915530	4942900		1.91553	4.9429
322	2009260	5092600		2.00926	5.0926
323	2095460	5228700		2.09546	5.2287
324	2177750	5374770		2.17775	5.37477
325	2268190	5491410		2.26819	5.49141
326	2348970	5626920		2.34897	5.62692
327	2434230	5732980		2.43423	5.73298
328	2540850	5855450		2.54085	5.85545
329	2614260	5959580		2.61426	5.95958
330	2694590	6034470		2.69459	6.03447
331	2772800	6097930		2.7728	6.09793
332	2855860	6165810		2.85586	6.16581
333	2935920	6235060		2.93592	6.23506
334	3014440	6302930		3.01444	6.30293
335	3080050	6367160		3.08005	6.36716
336	3153990	6406770		3.15399	6.40677
337	3205500	6452320		3.2055	6.45232
338	3261020	6491970		3.26102	6.49197
339	3338970	6522210		3.33897	6.52221
340	3389340	6573350		3.38934	6.57335
341	3448210	6590910		3.44821	6.59091
342	3494160	6634790		3.49416	6.63479
343	3562970	6632930		3.56297	6.63293
344	3615420	6642360		3.61542	6.64236
345	3644240	6677210		3.64424	6.67721
346	3692140	6675920		3.69214	6.67592
347	3721630	6681260		3.72163	6.68126
348	3752010	6683850		3.75201	6.68385
349	3796330	6666850		3.79633	6.66685
350	3831210	6655470		3.83121	6.65547
351	3847110	6651960		3.84711	6.65196
352	3858390	6626980		3.85839	6.62698
353	3876850	6614910		3.87685	6.61491
354	3885010	6569070		3.88501	6.56907
355	3911800	6532820		3.9118	6.53282
356	3922430	6492260		3.92243	6.49226
357	3913120	6436150		3.91312	6.43615
358	3917000	6398640		3.917	6.39864
359	3906810	6334890		3.90681	6.33489
360	3900960	6274830		3.90096	6.27483
361	3872840	6215340		3.87284	6.21534
362	3859920	6150340		3.85992	6.15034
363	3842720	6072730		3.84272	6.07273
364	3814880	5998150		3.81488	5.99815
365	3805310	5927450		3.80531	5.92745
366	3793320	5852640		3.79332	5.85264
367	3762840	5774880		3.76284	5.77488
368	3724440	5690830		3.72444	5.69083
369	3684110	5611780		3.68411	5.61178
370	3648480	5509230		3.64848	5.50923
371	3608450	5433430		3.60845	5.43343
372	3569270	5340820		3.56927	5.34082
373	3532100	5249800		3.5321	5.2498
374	3483210	5129580		3.48321	5.12958
375	3450750	5060770		3.45075	5.06077
376	3403590	4992540		3.40359	4.99254
377	3343810	4890440		3.34381	4.89044
378	3304920	4807910		3.30492	4.80791
379	3257260	4729540		3.25726	4.72954
380	3216210	4648650		3.21621	4.64865
381	3169420	4569720		3.16942	4.56972
382	3111890	4494500		3.11189	4.4945
383	3068510	4424700		3.06851	4.4247
384	3013060	4331560		3.01306	4.33156
385	2979000	4265090		2.979	4.26509
386	2929700	4172950		2.9297	4.17295
387	2885520	4071140		2.88552	4.07114
388	2827130	3988570		2.82713	3.98857
389	2779400	3882390		2.7794	3.88239
390	2728430	3795770		2.72843	3.79577
391	2682700	3729820		2.6827	3.72982
392	2633060	3632110		2.63306	3.63211
393	2582520	3544850		2.58252	3.54485
394	2550790	3471410		2.55079	3.47141
395	2498300	3375520		2.4983	3.37552
396	2449780	3323280		2.44978	3.32328
397	2407980	3227950		2.40798	3.22795
398	2378260	3155370		2.37826	3.15537
399	2333010	3087190		2.33301	3.08719
400	2284380	3013830		2.28438	3.01383
401	2242110	2952990		2.24211	2.95299
402	2202550	2894170		2.20255	2.89417
403	2182630	2833560		2.18263	2.83356
404	2149810	2775050		2.14981	2.77505
405	2119130	2708950		2.11913	2.70895
406	2086790	2656260		2.08679	2.65626
407	2066350	2606590		2.06635	2.60659
408	2041610	2558230		2.04161	2.55823
409	2016730	2505260		2.01673	2.50526
410	1995090	2461960		1.99509	2.46196
411	1973450	2415090		1.97345	2.41509
412	1945960	2363380		1.94596	2.36338
413	1931140	2321730		1.93114	2.32173
414	1918400	2277030		1.9184	2.27703
415	1909740	2224560		1.90974	2.22456
416	1884730	2183110		1.88473	2.18311
417	1874460	2134540		1.87446	2.13454
418	1862240	2097410		1.86224	2.09741
419	1855800	2062560		1.8558	2.06256
420	1838180	2008800		1.83818	2.0088
421	1831860	1971280		1.83186	1.97128
422	1819740	1928020		1.81974	1.92802
423	1812670	1896740		1.81267	1.89674
424	1801670	1865080		1.80167	1.86508
425	1793330	1827290		1.79333	1.82729
426	1774730	1786790		1.77473	1.78679
427	1779410	1750600		1.77941	1.7506
428	1763920	1729750		1.76392	1.72975
429	1759700	1688700		1.7597	1.6887
430	1736230	1662140		1.73623	1.66214
431	1741420	1634820		1.74142	1.63482
432	1732790	1605830		1.73279	1.60583
433	1717440	1578290		1.71744	1.57829
434	1700380	1546680		1.70038	1.54668
435	1691140	1522240		1.69114	1.52224
436	1681230	1498390		1.68123	1.49839
437	1659970	1463670		1.65997	1.46367
438	1657100	1439180		1.6571	1.43918
439	1638330	1412840		1.63833	1.41284
440	1632240	1394940		1.63224	1.39494
441	1609930	1361110		1.60993	1.36111
442	1590970	1327790		1.59097	1.32779
443	1575040	1311890		1.57504	1.31189
444	1572420	1284790		1.57242	1.28479
445	1554140	1263820		1.55414	1.26382
446	1549100	1239620		1.5491	1.23962
447	1527760	1208740		1.52776	1.20874
448	1519810	1189290		1.51981	1.18929
449	1503310	1165770		1.50331	1.16577
450	1493830	1146800		1.49383	1.1468

## Sheet: Fig 3ab
Size (μm)	0 M	0.5 M	Heated	Heated+ 0.5 M		% Volume In	after 28 days	0 M	0.5 M	Heated	Heated+ 0.5 M
0.01	0	0	0	0		0		0	0	0	0
0.0114	0	0	0	0		0		0	0	0	0
0.0129	0	0	0	0		0		0	0	0	0
0.0147	0	0	0	0		0		0	0	0	0
0.0167	0	0	0	0		0		0	0	0	0
0.0189	0	0	0	0		0		0	0	0	0
0.0215	0	0	0	0		0		0	0	0	0
0.0244	0	0	0	0		0		0	0	0	0
0.0278	0	0	0	0		0		0	0	0	0
0.0315	0	0	0	0		0		0	0	0	0
0.0358	0	0	0	0		0		0	0	0	0
0.0407	0	0	0	0		0		0	0	0	0
0.0463	0	0	0	0		0		0	0	0	0
0.0526	0	0	0	0		0		0	0	0	0
0.0597	0	0	0	0		0		0	0	0	0
0.0679	0	0	0	0		0		0	0	0	0
0.0771	0	0	0	0		0		0	0	0	0
0.0876	0	0	0	0		0		0	0	0	0
0.0995	0.17	0	0	0		0		0	0	0	0
0.113	0.49	0	0	0		0		0	0	0	0
0.128	1.04	0	0	0		0.22		0.22	0	0	0
0.146	1.8	0.09	0.32	0		0.71		0.71	0.11	0.26	0
0.166	2.76	0.4	0.86	0.13		1.52		1.52	0.42	0.75	0.1
0.188	3.87	1	1.71	0.42		2.63		2.63	0.98	1.55	0.34
0.214	5.04	1.88	2.8	0.87		3.96		3.96	1.77	2.6	0.75
0.243	6.19	2.99	4.05	1.47		5.39		5.39	2.72	3.83	1.28
0.276	7.22	4.21	5.32	2.12		6.76		6.76	3.72	5.1	1.86
0.314	8.02	5.4	6.46	2.74		7.92		7.92	4.65	6.28	2.41
0.357	8.52	6.43	7.32	3.23		8.71		8.71	5.37	7.2	2.84
0.405	8.65	7.16	7.79	3.51		9.02		9.02	5.79	7.75	3.08
0.46	8.4	7.51	7.84	3.55		8.83		8.83	5.87	7.86	3.09
0.523	7.83	7.49	7.51	3.35		8.18		8.18	5.64	7.56	2.88
0.594	7.01	7.16	6.91	2.98		7.22		7.22	5.21	6.95	2.53
0.675	6.06	6.65	6.23	2.54		6.14		6.14	4.73	6.2	2.13
0.767	5.08	6.13	5.61	2.11		5.1		5.1	4.33	5.48	1.75
0.872	4.13	5.69	5.14	1.77		4.23		4.23	4.11	4.91	1.47
0.991	3.22	5.36	4.8	1.52		3.52		3.52	4.04	4.5	1.26
1.13	2.34	5.06	4.48	1.34		2.92		2.92	4.03	4.16	1.11
1.28	1.49	4.68	4.05	1.23		2.35		2.35	3.99	3.79	1.01
1.45	0.64	4.11	3.44	1.23		1.76		1.76	3.83	3.28	1
1.65	0	3.36	2.68	1.44		1.18		1.18	3.58	2.65	1.18
1.88	0	2.54	1.91	1.93		0.69		0.69	3.3	1.97	1.66
2.13	0	1.79	1.24	2.71		0.38		0.38	3.04	1.37	2.43
2.42	0	1.18	0.75	3.64		0.21		0.21	2.79	0.9	3.41
2.75	0	0.73	0.43	4.56		0.14		0.14	2.51	0.59	4.42
3.12	0	0.42	0.23	5.3		0.13		0.13	2.19	0.41	5.3
3.55	0	0.22	0.11	5.78		0.11		0.11	1.82	0.3	5.95
4.03	0	0.06	0	5.96		0.07		0.07	1.43	0.23	6.31
4.58	0	0.01	0	5.86		0		0	1.06	0.19	6.37
5.21	0	0	0	5.55		0		0	0.78	0.17	6.19
5.92	0	0.02	0	5.08		0		0	0.6	0.18	5.8
6.72	0	0.04	0	4.47		0		0	0.51	0.19	5.22
7.64	0	0.05	0	3.73		0		0	0.46	0.2	4.47
8.68	0	0.05	0	2.93		0		0	0.43	0.2	3.61
9.86	0	0.05	0	2.14		0		0	0.4	0.17	2.73
11.2	0	0.04	0	1.43		0		0	0.36	0.14	1.9
12.7	0	0.03	0	0.84		0		0	0.32	0.1	1.19
14.5	0	0.02	0	0.41		0		0	0.29	0.06	0.64
16.4	0	0	0	0.14		0		0	0.27	0	0.27
18.7	0	0	0	0		0		0	0.27	0	0.07
21.2	0	0	0	0		0		0	0.29	0	0
24.1	0	0	0	0		0		0	0.33	0	0
27.4	0	0	0	0		0		0	0.37	0	0
31.1	0	0	0	0		0		0	0.38	0	0
35.3	0	0	0	0		0		0	0.36	0	0
40.1	0	0	0	0		0		0	0.29	0	0
45.6	0	0	0	0		0		0	0.18	0	0
51.8	0	0	0	0		0		0	0.08	0	0
58.9	0	0	0	0		0		0	0.01	0	0
66.9	0	0	0	0		0		0	0	0	0
76	0	0	0	0		0		0	0	0	0
86.4	0	0	0	0		0		0	0	0	0
98.1	0	0	0	0		0		0	0	0	0
111	0	0	0	0		0		0	0	0	0
127	0	0	0	0		0		0	0	0	0
144	0	0	0	0		0		0	0	0	0
163	0	0	0	0		0		0	0	0	0
186	0	0	0	0		0		0	0	0	0
211	0	0	0	0		0		0	0	0	0
240	0	0	0	0		0		0	0	0	0
272	0	0	0	0		0		0	0	0	0
310	0	0	0	0		0		0	0	0	0
352	0	0	0	0		0		0	0	0	0
400	0	0	0	0		0		0	0	0	0
454	0	0	0	0		0		0	0	0	0
516	0	0	0	0		0		0	0	0	0
586	0	0	0	0		0		0	0	0	0
666	0	0	0	0		0		0	0	0	0
756	0	0	0	0		0		0	0	0	0
859	0	0	0	0		0		0	0	0	0
976	0	0	0	0		0		0	0	0	0
1110	0	0	0	0		0		0	0	0	0
1260	0	0	0	0		0		0	0	0	0
1430	0	0	0	0		0		0	0	0	0
1630	0	0	0	0		0		0	0	0	0
1850	0	0	0	0		0		0	0	0	0
2100	0	0	0	0		0		0	0	0	0
2390	0	0	0	0		0		0	0	0	0
2710	0	0	0	0		0		0	0	0	0
3080	0	0	0	0		0		0	0	0	0
3500

## Sheet: Fig 7a
	Av. Integral Transmission in %			Av. Integral Transmission in %			Av. Integral Transmission in %			Av. Integral Transmission in %			Av. Integral Transmission in %			Av. Integral Transmission in %			Av. Integral Transmission in %			Av. Integral Transmission in %
Time in min	0 M		Time in min	0 M 28 days		Time in min	0 M + Heated		Time in min	0 M + Heated 28 days		Time in min	0.5 M		Time in min	0.5 M 28 days		Time in min	0.5 M + Heated		Time in min	0.5 M + heated 28 days
0.996667	1.36927		0.9965	1.49488		0.992667	1.74747		0.990167	1.79822		0.999333	16.0579		0.996333	14.5707		0.995333	67.43		1.0005	58.5981
1.99483	1.39586		1.99617	1.54219		1.99183	1.80932		1.99583	1.87399		1.9985	35.6444		1.99183	30.41		1.99383	74.753		1.99967	68.9297
2.99517	1.43194		2.99683	1.59852		2.99167	1.86593		2.9965	1.906		2.99917	49.279		2.99183	42.2359		2.99383	77.4753		3.00017	72.6749
3.99483	1.49104		3.99617	1.70062		3.99183	1.94683		3.99617	1.99196		3.99883	57.4274		3.9915	48.9087		3.99367	78.9999		4	74.7825
4.99567	1.51373		4.997	1.74316		4.99183	2.02061		4.99667	2.04683		4.99867	62.1255		4.992	53.1277		4.99433	79.9586		4.99967	76.1327
5.99567	1.55264		5.996	1.79982		5.992	2.13033		5.99683	2.11817		5.99933	64.847		5.99183	56.2545		5.99433	80.7089		6.00033	77.0546
6.995	1.59085		6.99633	1.88566		6.99183	2.22774		6.99633	2.17936		6.999	66.9037		6.992	58.5836		6.99383	81.2824		7.00017	77.6251
7.99583	1.64927		7.997	1.91877		7.992	2.3242		7.99717	2.28397		7.9995	68.7834		7.992	60.5258		7.9945	81.7079		8.0005	78.2394
8.996	1.67996		8.9965	2.03287		8.99217	2.41545		8.99717	2.35629		8.9995	70.0938		8.9915	62.1028		8.99467	82.0437		9.00067	78.608
9.99567	1.73599		9.99683	2.10191		9.99217	2.54706		9.997	2.44213		9.9995	71.2946		9.992	63.3781		9.99433	82.3025		10.0007	78.9511
10.9958	1.79077		10.9965	2.19779		10.9925	2.64752		10.9968	2.55108		10.9992	72.1544		10.9917	64.5845		10.9947	82.5421		11.0005	79.2784
11.9953	1.82755		11.9973	2.25404		11.9925	2.76446		11.9967	2.64045		11.9993	73.09		11.9925	65.5151		11.994	82.6914		12.0005	79.4563
12.996	1.89226		12.9963	2.38969		12.9922	2.8894		12.997	2.75609		12.9992	73.8757		12.9918	66.3695		12.9947	82.8623		13.0005	79.7009
13.9957	1.96137		13.997	2.47172		13.9923	2.97684		13.9968	2.80346		13.9995	74.4064		13.992	67.0782		13.9943	82.9836		14.0008	79.8486
14.996	1.9826		14.9977	2.60371		14.9925	3.10637		14.9972	2.92222		14.9998	74.9645		14.9925	67.7376		14.9947	83.154		15.0012	80.0471
15.9962	2.05883		15.9962	2.69081		15.992	3.27487		15.9972	3.03386		15.9997	75.4183		15.9927	68.3118		15.995	83.2192		16.001	80.1783
16.9957	2.12227		16.9968	2.76886		16.9923	3.39376		16.997	3.15092		16.9997	75.8692		16.9922	68.8258		16.9945	83.2973		17.001	80.2296
17.9958	2.16373		17.9972	2.88013		17.9923	3.52998		17.9968	3.27442		17.9995	76.1255		17.992	69.2487		17.9948	83.4352		18.0008	80.4415
18.996	2.24395		18.9968	3.03204		18.9925	3.66206		18.9973	3.37682		18.9998	76.4492		18.992	69.6986		18.9947	83.5223		19.001	80.5409
19.9965	2.29278		19.9967	3.10344		19.9925	3.79907		19.9978	3.48859		20	76.8162		19.9918	70.0492		19.9953	83.5532		20.0012	80.6046
20.996	2.36421		20.9982	3.20435		20.993	3.91524		20.9972	3.61004		20.9998	77.0539		20.9925	70.431		20.9947	83.6267		21.001	80.6856
21.9962	2.43277		21.9977	3.31457		21.9927	4.06393		21.9975	3.70636		22	77.2819		21.9922	70.7458		21.995	83.6911		22.0012	80.777
22.9962	2.51017		22.998	3.43566		22.9932	4.20047		22.9972	3.83315		22.9995	77.5254		22.9925	70.9719		22.995	83.7799		23.0007	80.8953
23.9962	2.54537		23.9975	3.56098		23.9932	4.3013		23.9975	3.92844		24	77.7815		23.9928	71.3276		23.9948	83.8008		24.0013	80.9213
24.9962	2.6552		24.9977	3.68422		24.9923	4.4606		24.9975	4.04107		25	77.8639		24.9923	71.5173		24.9948	83.8006		25.001	80.9378
25.9968	2.68241		25.9965	3.79581		25.9923	4.57878		25.998	4.14253		26	78.0413		25.9927	71.7735		25.9955	83.8561		26.0012	80.9153
26.9967	2.78028		26.9967	3.9332		26.9925	4.74186		26.998	4.24979		27.0005	78.2099		26.993	71.9483		26.9955	83.9131		27.0015	81.0594
27.997	2.8175		27.9977	3.98959		27.993	4.8816		27.998	4.35744		28	78.347		27.9927	72.0763		27.9957	83.9292		28.0012	81.0818
28.997	2.88105		28.9978	4.08873		28.9928	4.9565		28.998	4.45183		29	78.4752		28.9932	72.3444		28.9957	83.972		29.001	81.1076
29.997	2.97381		29.9973	4.2681		29.9932	5.17542		29.998	4.61308		30	78.6203		29.9927	72.52		29.9957	83.9705		30.0012	81.154
30.9973	3.01736		30.9978	4.32104		30.9937	5.23702		30.9982	4.69057		31.0003	78.6222		30.9928	72.6611		30.996	84.0046		31.0013	81.1882
31.9968	3.10854		31.9975	4.47532		31.9933	5.40987		31.9982	4.83729		32.0007	78.7889		31.9933	72.8111		31.9955	84.0043		32.0017	81.2079
32.9965	3.14277		32.998	4.5758		32.9937	5.53751		32.9978	4.89982		33.0002	78.9302		32.993	72.8692		32.9952	84.0284		33.0013	81.2436
33.9972	3.24063		33.9972	4.72532		33.993	5.67384		33.9982	5.07434		34.0002	78.962		33.993	73.0909		33.9962	84.0064		34.0013	81.2487
34.9973	3.29388		34.9978	4.82707		34.9933	5.82963		34.9987	5.18514		35.0007	79.0726		34.9928	73.211		34.9962	84.0792		35.0017	81.3197
35.9972	3.37147		35.9983	4.98904		35.9938	5.93674		35.9982	5.29425		36.0002	79.1901		35.9937	73.3367		35.996	84.0766		36.0012	81.2797
36.9972	3.47494		36.9983	5.06274		36.9933	6.09326		36.9982	5.41599		37.0002	79.2713		36.9933	73.4028		36.996	84.108		37.0015	81.3729
37.9972	3.49804		37.9983	5.21823		37.9938	6.18775		37.9985	5.47914		38.001	79.3602		37.9933	73.5291		37.9958	84.1207		38.0022	81.3571
38.997	3.59836		38.9978	5.32921		38.9932	6.38027		38.9982	5.64908		39.0002	79.3796		38.9938	73.6151		38.996	84.1403		39.0012	81.4108
39.9973	3.67164		39.9983	5.44936		39.9935	6.51418		39.9983	5.70923		40.0003	79.4014		39.9937	73.7062		39.9962	84.1539		40.0015	81.3531
40.9977	3.74604		40.9992	5.55585		40.9942	6.65561		40.999	5.8595		41.001	79.5218		40.994	73.7769		40.9963	84.1648		41.0022	81.4082
41.9972	3.79937		41.9985	5.71541		41.994	6.8232		41.9982	5.97981		42.0003	79.5645		41.9942	73.9147		41.9962	84.1949		42.0013	81.4331
42.9977	3.8441		42.9988	5.76965		42.9937	6.92203		42.9987	6.077		43.0008	79.5989		42.9937	73.9548		42.9967	84.2087		43.0018	81.4873
43.997	3.95421		43.9987	5.92677		43.9937	7.12203		43.998	6.23483		44.0007	79.7183		43.9942	74.0169		43.996	84.1997		44.0018	81.4445
44.9973	4.01401		44.9985	6.05892		44.9942	7.24144		44.9985	6.34007		45.0005	79.7052		44.9943	74.0951		44.9963	84.2159		45.0015	81.4914
45.9973	4.06946		45.999	6.16967		45.9945	7.33379		45.9983	6.41875		46.0005	79.8185		45.9938	74.2099		45.9963	84.2271		46.0015	81.4431
46.9975	4.16063		46.999	6.31255		46.9938	7.52368		46.9987	6.57253		47.0007	79.8473		46.9947	74.2601		46.9965	84.2116		47.0017	81.4883
47.9977	4.2269		47.9992	6.45804		47.9942	7.63609		47.999	6.64493		48.0013	79.8976		47.9945	74.3009		47.9963	84.2752		48.0023	81.5262
48.9975	4.30082		48.999	6.47118		48.9943	7.78506		48.9985	6.7934		49.0007	79.9569		48.9947	74.3665		48.9965	84.2457		49.0017	81.5035
49.9975	4.36977		49.9997	6.62264		49.9943	7.88933		49.9985	6.87191		50.0005	79.9274		49.9948	74.3939		49.9963	84.2732		50.0017	81.5118
50.997	4.44035		50.9998	6.83231		50.9945	8.08519		50.998	7.02448		51.0003	80.0081		50.9945	74.4534		50.9958	84.27		51.0017	81.5479
51.9972	4.46999		51.9993	6.91536		51.9942	8.17792		51.9985	7.1		52.0012	80.0137		51.9945	74.4607		51.9962	84.2656		52.0022	81.4965
52.9972	4.57975		53	7.06004		52.995	8.36961		52.9985	7.26437		53.0012	80.0955		52.995	74.5199		52.9962	84.2801		53.0022	81.5383
53.9972	4.63149		54	7.12749		53.9948	8.47202		53.9985	7.34387		54.0012	80.0861		53.9942	74.5523		53.9962	84.291		54.0025	81.4964
54.9975	4.75561		54.9998	7.31142		54.9947	8.65686		54.9985	7.53873		55.0007	80.1034		54.9945	74.642		54.9965	84.267		55.002	81.5392
55.9973	4.77978		55.9998	7.38412		55.995	8.74		55.9983	7.58562		56.0007	80.1858		55.9952	74.6723		55.9962	84.3196		56.002	81.5672
56.9983	4.87074		56.9995	7.56428		56.9952	8.93833		56.9993	7.72103		57.0018	80.1805		56.995	74.7422		56.9973	84.2652		57.0032	81.5007
57.9983	4.91921		58	7.66858		57.9948	9.05373		57.9993	7.8366		58.0018	80.2582		57.995	74.8093		57.9973	84.3228		58.0032	81.6044
58.9978	5.02247		58.9998	7.80329		58.9948	9.21488		58.9988	7.94198		59.0013	80.2627		58.9952	74.8514		58.9968	84.2947		59.0025	81.5704
59.9975	5.10269		59.9997	7.90137		59.9953	9.35234		59.9988	8.07419		60.0015	80.2473		59.9953	74.8836		59.9965	84.2955		60.0028	81.5318
60.9985	5.16549		61.0003	8.0644		60.9952	9.51337		60.9995	8.17596		61.0022	80.3258		60.995	74.868		60.9973	84.3503		61.0035	81.6226
61.9992	5.2724		62.0005	8.18427		61.9953	9.63345		62.0003	8.31102		62.0027	80.3288		61.9952	74.9035		61.9978	84.2828		62.0038	81.5341
62.9982	5.29722		63.0005	8.28212		62.9957	9.78074		62.9993	8.42617		63.0018	80.3529		62.9953	74.9588		62.9972	84.3332		63.0032	81.59
63.9988	5.39219		64.0002	8.44216		63.9955	9.90978		64.0002	8.52918		64.0022	80.2926		63.9955	74.9783		63.9975	84.3079		64.0032	81.5622
64.9978	5.45376		65.0005	8.52851		64.9953	10.0642		64.9992	8.68113		65.0018	80.3912		64.9952	75.04		64.9968	84.3616		65.0032	81.6246
65.9988	5.53087		66.0007	8.72865		65.9955	10.2039		66.0002	8.77126		66.0027	80.408		65.9957	75.0695		65.9978	84.2968		66.004	81.5277
66.999	5.61922		67.0005	8.80155		66.9957	10.3292		67.0003	8.91521		67.0028	80.4757		66.9952	75.0747		66.9977	84.3733		67.0042	81.6205
67.9995	5.64462		68.0005	8.88843		67.9955	10.447		68.0008	8.98704		68.003	80.4533		67.9958	75.116		67.9983	84.3586		68.004	81.5948
68.9997	5.77645		69.0005	9.0833		68.9953	10.6686		69.0007	9.15449		69.0032	80.4627		68.9953	75.1523		68.9983	84.3411		69.0045	81.6145
69.9997	5.83427		70.0005	9.22031		69.9953	10.7689		70.001	9.19138		70.0033	80.509		69.9957	75.1914		69.9983	84.3382		70.0045	81.5751
70.999	5.93821		71.001	9.36309		70.996	10.9526		71.0003	9.38272		71.003	80.5107		70.9955	75.2128		70.9978	84.3283		71.004	81.5696
71.9992	5.97568		72.0002	9.46625		71.996	11.0632		72.0005	9.46659		72.0032	80.5698		71.996	75.2498		71.998	84.314		72.0045	81.5797
72.9995	6.06723		72.9998	9.56616		72.9955	11.1992		73.0008	9.58611		73.0033	80.5358		72.9957	75.2105		72.9982	84.3888		73.0045	81.6076
73.9993	6.1348		74.0007	9.75464		73.9957	11.3617		74.0003	9.69003		74.003	80.5633		73.996	75.2843		73.9982	84.3902		74.0042	81.5885
75	6.20645		75.0005	9.82297		74.9958	11.4735		75.001	9.80022		75.0033	80.6074		74.9962	75.2719		74.9987	84.3814		75.0045	81.6216
75.9998	6.31507		75.9998	10.0391		75.9955	11.6551		76.0008	9.97046		76.003	80.5427		75.996	75.3077		75.9985	84.3979		76.0042	81.6248
76.9998	6.3519		77.0003	10.1033		76.9953	11.7365		77.0008	10.0353		77.0032	80.6177		76.9962	75.3251		76.9988	84.3791		77.0043	81.6094
78.0002	6.45438		78	10.2735		77.9955	11.9508		78.0015	10.1876		78.0035	80.6132		77.9958	75.3753		77.9988	84.3836		78.0045	81.5775
79	6.52875		78.9998	10.3226		78.9957	12.0067		79.001	10.2591		79.0033	80.602		78.9963	75.3419		78.9988	84.3162		79.0043	81.5283
80.0002	6.60454		80.0007	10.5004		79.9957	12.2181		80.0013	10.4063		80.0033	80.5789		79.9963	75.3798		79.9988	84.3976		80.0045	81.65
81.0002	6.68302		81.0003	10.6902		80.9957	12.3925		81.0012	10.5227		81.0033	80.6778		80.9958	75.4058		80.999	84.3677		81.0045	81.6121
81.9997	6.75377		81.9998	10.7144		81.9957	12.4612		82.001	10.6059		82.0035	80.6822		81.9957	75.46		81.9983	84.398		82.0047	81.6377
83.0003	6.82804		83.0005	10.8168		82.9957	12.604		83.0015	10.7201		83.0038	80.6906		82.9962	75.4557		82.999	84.3843		83.0052	81.655
84.0003	6.89563		84.0008	11.0506		83.9967	12.7895		84.0015	10.8566		84.0035	80.7233		83.9967	75.4885		83.999	84.3428		84.0045	81.5636
84.9997	6.97326		85.0008	11.099		84.9965	12.9284		85.001	10.978		85.0032	80.7342		84.9967	75.4666		84.9985	84.3536		85.0042	81.5966
86.0005	7.08187		86.001	11.2707		85.9963	13.0852		86.0015	11.1018		86.0037	80.6492		85.9962	75.4598		85.9992	84.3624		86.0047	81.6262
87.0005	7.12611		87.0007	11.3979		86.9963	13.1914		87.0018	11.1711		87.004	80.7611		86.9965	75.5502		86.9993	84.4008		87.005	81.6736
88.0005	7.25483		88.0013	11.5587		87.9968	13.4		88.0017	11.371		88.0043	80.7433		87.9972	75.546		87.9992	84.3692		88.0053	81.6402
88.9998	7.30369		89.001	11.6981		88.9965	13.4943		89.0012	11.432		89.0035	80.7244		88.997	75.555		88.9987	84.4154		89.0048	81.6472
90.0003	7.36529		90.0007	11.791		89.9962	13.5773		90.0015	11.5136		90.0035	80.7507		89.997	75.5702		89.9995	84.4298		90.0045	81.6307
90.9998	7.46615		91.0015	11.9759		90.9968	13.8065		91.001	11.6781		91.003	80.7458		90.9972	75.57		90.999	84.4344		91.004	81.6745
92.0003	7.50052		92.0012	12.0273		91.9965	13.8957		92.0013	11.7249		92.0035	80.7651		91.9973	75.5968		91.9993	84.3856		92.0045	81.6692
93.0005	7.66586		93.0012	12.2243		92.9963	14.1079		93.0015	11.9574		93.0037	80.8512		92.9973	75.639		92.9995	84.429		93.0047	81.6587
94.0003	7.68053		94.0017	12.3077		93.9972	14.1716		94.0015	12.0063		94.0035	80.8054		93.9973	75.6326		93.9993	84.4193		94.0045	81.6616
95.001	7.79171		95.0018	12.4414		94.9967	14.3975		95.002	12.151		95.0042	80.7719		94.9972	75.6168		94.9997	84.3873		95.0052	81.655
96.0012	7.85015		96.002	12.6009		95.9973	14.4865		96.0025	12.2368		96.0045	80.8655		95.997	75.6885		95.9998	84.4024		96.0057	81.6645
97.0005	7.93475		97.0018	12.6767		96.9972	14.594		97.0015	12.3082		97.0035	80.7913		96.9977	75.6749		96.9993	84.4254		97.0047	81.651
98.0013	8.02973		98.002	12.8667		97.9968	14.7998		98.0023	12.4821		98.0043	80.8452		97.9975	75.7197		98	84.4349		98.0055	81.6766
99.0005	8.07801		99.002	12.9484		98.9973	14.8938		99.0015	12.5936		99.0037	80.8772		98.9972	75.6823		98.9995	84.4033		99.0047	81.6733
100	8.15409		100.002	13.1622		99.9975	15.0336		100.001	12.7		100.004	80.9092		99.9978	75.7451		99.9992	84.4305		100.005	81.6619
101.001	8.26474		101.002	13.1502		100.997	15.2012		101.002	12.8315		101.004	80.849		100.998	75.7672		101	84.4253		101.005	81.6421
102.001	8.32263		102.003	13.3966		101.998	15.3348		102.002	12.9476		102.004	80.8364		101.998	75.7674		102	84.3938		102.005	81.6591
103.002	8.44241		103.002	13.4784		102.997	15.5069		103.003	13.0896		103.005	80.8867		102.998	75.7899		103	84.4201		103.006	81.634
104.001	8.47371		104.002	13.649		103.998	15.6068		104.003	13.1481		104.005	80.8608		103.998	75.7588		104	84.4074		104.006	81.6715
105.001	8.58456		105.002	13.7074		104.997	15.7746		105.002	13.2689		105.005	80.9282		104.998	75.7987		105.001	84.4357		105.006	81.6799
106.001	8.6647		106.003	13.8183		105.998	15.8628		106.002	13.3695		106.004	80.9381		105.997	75.7724		105.999	84.4613		106.006	81.6927
107.001	8.72122		107.002	14.0158		106.998	16.0373		107.002	13.4954		107.005	80.9669		106.998	75.8035		107	84.4602		107.006	81.678
108.001	8.83811		108.003	14.1234		107.998	16.1737		108.002	13.6167		108.004	80.9555		107.998	75.8513		108	84.4681		108.006	81.6875
109.002	8.85886		109.002	14.2493		108.998	16.2638		109.003	13.7038		109.005	80.9448		108.998	75.8399		109	84.4059		109.006	81.6483
110.001	9.00443		110.002	14.3471		109.998	16.4941		110.002	13.8727		110.004	80.9411		109.998	75.821		110	84.42		110.005	81.6586
111.002	9.00511		111.003	14.5578		110.998	16.5781		111.003	13.9116		111.005	80.9551		110.999	75.8601		111.001	84.4795		111.007	81.6789
112.001	9.15859		112.003	14.6136		111.998	16.765		112.002	14.1063		112.004	80.9864		111.998	75.8686		112	84.4619		112.006	81.7061
113.001	9.19684		113.003	14.7854		112.998	16.8702		113.002	14.2027		113.005	80.9421		112.998	75.8935		113	84.4632		113.006	81.6969
114.001	9.27324		114.003	14.8989		113.999	16.999		114.003	14.2763		114.005	80.9179		113.998	75.8951		114.001	84.5166		114.007	81.7372
115.001	9.40393		115.003	15.0191		114.998	17.1635		115.002	14.4522		115.005	80.9899		114.999	75.8982		115	84.4498		115.006	81.669
116.001	9.42021		116.003	15.1222		115.999	17.2289		116.002	14.4867		116.005	80.9453		115.999	75.8467		116	84.4983		116.006	81.7212
117.002	9.55557		117.004	15.2455		116.998	17.4794		117.003	14.6531		117.005	80.9851		116.999	75.9536		117	84.4581		117.006	81.6852
118.002	9.59179		118.004	15.4121		117.999	17.5603		118.003	14.7322		118.005	80.9832		117.999	75.8931		118.001	84.4467		118.007	81.6711
119.002	9.72229		119.003	15.5273		118.999	17.7369		119.003	14.9111		119.005	81.0103		118.999	75.9644		119	84.5154		119.007	81.6974
120.002	9.76581		120.003	15.6612		119.998	17.8442		120.003	14.9812		120.006	81.0286		119.999	75.9721		120.001	84.4881		120.007	81.7095
121.002	9.90605		121.003	15.7501		120.999	18.0055		121.004	15.1142		121.005	81.0799		120.999	75.9929		121.001	84.491		121.007	81.7293
122.002	9.95817		122.004	15.9058		121.999	18.1909		122.003	15.265		122.006	80.9397		121.999	75.9635		122.001	84.5059		122.007	81.7283
123.002	10.0361		123.003	15.9839		122.998	18.2335		123.004	15.2722		123.007	81.0082		122.999	75.9471		123.001	84.5004		123.008	81.725
124.002	10.1282		124.004	16.1321		123.999	18.4207		124.004	15.4113		124.006	81.0435		123.999	75.9842		124.001	84.4936		124.007	81.762
125.002	10.2237		125.004	16.3098		124.999	18.5804		125.003	15.5706		125.006	81.0678		124.999	76.0117		125.001	84.4865		125.007	81.7069
126.002	10.2819		126.004	16.4186		125.999	18.6925		126.004	15.6506		126.006	81.074		125.999	76.0042		126.001	84.516		126.007	81.7269
127.002	10.3314		127.004	16.5198		126.999	18.8013		127.004	15.7441		127.006	81.0477		126.999	76.0138		127.001	84.4538		127.007	81.6834
128.002	10.4533		128.003	16.7112		127.999	19.0048		128.004	15.954		128.006	81.0974		127.999	76.0244		128.001	84.5232		128.008	81.7446
129.002	10.4723		129.004	16.6264		128.999	18.9884		129.004	15.9636		129.006	81.0231		129	75.9807		129.001	84.474		129.007	81.6696
130.003	10.6149		130.003	16.8434		129.999	19.2364		130.005	16.1338		130.006	81.0351		129.999	76.0503		130.002	84.5209		130.007	81.77
131.002	10.6819		131.004	17.0715		130.999	19.3866		131.004	16.2294		131.006	81.076		130.999	76.0418		131.001	84.5258		131.007	81.7094
132.002	10.7254		132.004	17.0892		131.999	19.4436		132.004	16.2973		132.006	81.1359		132	76.0668		132.001	84.4967		132.007	81.7257
133.004	10.8711		133.004	17.3296		132.999	19.6545		133.005	16.4702		133.007	81.1453		132.999	76.0798		133.002	84.5211		133.008	81.6956
134.003	10.9064		134.004	17.3479		133.999	19.6796		134.004	16.5013		134.006	81.115		134	76.089		134.002	84.4193		134.007	81.6591
135.003	10.9926		135.004	17.3108		135	19.8608		135.004	16.6688		135.007	81.1057		135	76.0643		135.002	84.5098		135.008	81.7087
136.003	11.1333		136.004	17.6681		135.999	20.1167		136.005	16.8375		136.007	81.1442		136	76.0795		136.002	84.5238		136.008	81.7331
137.003	11.126		137.005	17.6719		136.999	20.0514		137.004	16.7823		137.007	81.1389		137	76.0741		137.002	84.5173		137.008	81.7537
138.004	11.231		138.005	17.9153		138	20.286		138.005	17.0116		138.007	81.1317		138	76.0844		138.002	84.4736		138.008	81.6832
139.003	11.2966		139.005	17.9248		139	20.3494		139.004	17.0568		139.006	81.0923		139	76.0774		139.002	84.5492		139.007	81.7742
140.004	11.4254		140.005	18.1303		140	20.599		140.005	17.2588		140.007	81.1631		140	76.0953		140.002	84.5065		140.008	81.7087
141.003	11.4433		141.005	18.1893		141	20.6265		141.005	17.2449		141.006	81.1862		141	76.0616		141.002	84.5291		141.007	81.6939
142.004	11.6137		142.005	18.3512		142	20.8256		142.005	17.4592		142.007	81.1428		142	76.102		142.003	84.519		142.008	81.7393
143.004	11.6163		143.005	18.4588		143	20.9331		143.005	17.5203		143.007	81.149		143	76.139		143.003	84.4894		143.008	81.6577
144.004	11.7858		144.005	18.525		144	21.0909		144.005	17.6692		144.008	81.1736		144	76.1067		144.003	84.5011		144.009	81.7273
145.004	11.8025		145.005	18.7212		145	21.2095		145.005	17.7706		145.008	81.2054		145	76.1266		145.003	84.5461		145.009	81.7316
146.003	11.8549		146.005	18.7563		146	21.285		146.005	17.8177		146.007	81.1368		146	76.1194		146.002	84.5042		146.008	81.6932
147.004	12.0034		147.005	18.9619		147	21.5348		147.005	18.0263		147.007	81.1927		147	76.1266		147.003	84.5006		147.009	81.7069
148.004	11.9865		148.005	18.9873		148	21.521		148.005	18.0277		148.007	81.1436		148	76.1405		148.002	84.5562		148.009	81.7063
149.004	12.142		149.005	19.2129		149	21.7898		149.005	18.2414		149.007	81.1343		149.001	76.186		149.003	84.5194		149.009	81.6961
150.004	12.1677		150.005	19.2437		150	21.831		150.005	18.2996		150.008	81.1913		150.001	76.1637		150.003	84.5163		150.009	81.7258
151.005	12.3355		151.005	19.4608		151	22.0741		151.006	18.4375		151.008	81.2268		151	76.1586		151.003	84.4889		151.009	81.6825
152.005	12.4026		152.006	19.4764		152.001	22.1148		152.006	18.5135		152.008	81.17		152.001	76.1583		152.003	84.4673		152.009	81.6517
153.004	12.4351		153.006	19.6008		153.001	22.2003		153.006	18.5724		153.008	81.1563		153.001	76.2069		153.003	84.5784		153.009	81.7192
154.004	12.5868		154.006	19.7832		154.001	22.4331		154.005	18.7515		154.008	81.1995		154.001	76.2029		154.003	84.5255		154.009	81.7272
155.004	12.6065		155.006	19.8218		155.001	22.4539		155.005	18.8083		155.008	81.1926		155.001	76.1789		155.003	84.5878		155.009	81.7447
156.005	12.759		156.006	20.041		156.001	22.7209		156.006	19.0376		156.008	81.1984		156	76.1767		156.004	84.5193		156.01	81.7081
157.005	12.8187		157.006	20.0806		157.001	22.7189		157.006	19.0508		157.008	81.2063		157.001	76.1436		157.004	84.5056		157.009	81.7013
158.005	12.8986		158.006	20.2741		158.001	22.9456		158.006	19.1966		158.008	81.2212		158.001	76.2354		158.004	84.5409		158.01	81.7354
159.005	12.9285		159.006	20.3224		159.001	22.9846		159.006	19.2525		159.008	81.2329		159	76.175		159.004	84.5126		159.009	81.7345
160.004	13.0565		160.006	20.5098		160.001	23.204		160.006	19.3956		160.008	81.193		160.001	76.2662		160.003	84.5778		160.01	81.7637
161.004	13.091		161.006	20.5026		161.001	23.2315		161.006	19.4271		161.008	81.22		161.001	76.2299		161.003	84.5505		161.01	81.741
162.005	13.2223		162.006	20.7058		162.001	23.4464		162.006	19.6388		162.008	81.2288		162.001	76.2311		162.004	84.5894		162.01	81.7873
163.005	13.2565		163.006	20.7987		163.001	23.5137		163.006	19.6803		163.008	81.1952		163.002	76.263		163.004	84.5787		163.01	81.7891
164.005	13.404		164.006	20.8586		164.001	23.6805		164.007	19.8477		164.009	81.256		164.001	76.3076		164.004	84.5942		164.011	81.7704
165.005	13.4081		165.006	21.0688		165.002	23.7203		165.006	19.8584		165.009	81.2054		165.001	76.2106		165.004	84.5019		165.01	81.6831
166.006	13.4828		166.006	21.0677		166.001	23.7861		166.007	19.9093		166.009	81.2343		166.001	76.252		166.004	84.5137		166.01	81.7208
167.005	13.6394		167.007	21.2742		167.002	24.0315		167.007	20.1573		167.009	81.2147		167.001	76.295		167.004	84.5514		167.01	81.7305
168.005	13.686		168.007	21.3256		168.002	24.095		168.006	20.1874		168.008	81.2241		168.002	76.2751		168.004	84.549		168.01	81.7133
169.006	13.8089		169.006	21.4842		169.002	24.2887		169.007	20.369		169.009	81.2461		169.002	76.2495		169.004	84.498		169.01	81.6355
170.005	13.8455		170.007	21.5939		170.002	24.3917		170.006	20.4297		170.009	81.3216		170.002	76.2579		170.004	84.5087		170.01	81.6895
171.006	13.9918		171.006	21.6836		171.001	24.5586		171.007	20.5708		171.009	81.2664		171.001	76.295		171.004	84.5283		171.01	81.7497
172.005	13.9583		172.007	21.8114		172.002	24.6011		172.006	20.5909		172.009	81.2928		172.002	76.2839		172.004	84.5427		172.01	81.7152
173.006	14.1409		173.007	21.8819		173.002	24.8028		173.007	20.8014		173.009	81.2502		173.002	76.3229		173.004	84.5729		173.011	81.7748
174.006	14.1938		174.006	22.0776		174.002	24.9308		174.007	20.9088		174.009	81.2351		174.002	76.3429		174.004	84.5645		174.01	81.6954
175.005	14.2314		175.007	22.04		175.002	24.9401		175.006	20.8932		175.009	81.2545		175.002	76.2761		175.004	84.5392		175.011	81.7154
176.006	14.3747		176.006	22.3091		176.002	25.192		176.007	21.1327		176.01	81.2918		176.002	76.2693		176.005	84.5037		176.011	81.704
177.006	14.3713		177.007	22.2846		177.002	25.1558		177.007	21.0805		177.009	81.2606		177.002	76.3116		177.005	84.5568		177.011	81.7428
178.006	14.5678		178.007	22.515		178.002	25.4739		178.007	21.3471		178.009	81.298		178.002	76.3384		178.005	84.5729		178.011	81.7658
179.006	14.658		179.007	22.4916		179.002	25.5152		179.007	21.419		179.01	81.3092		179.002	76.3477		179.005	84.5994		179.011	81.8064
180.006	14.6713		180.006	22.7919		180.001	25.5911		180.007	21.496		180.01	81.3046		180.003	76.3003		180.005	84.5207		180.011	81.7595
181.006	14.705		181.007	22.7382		181.002	25.6814		181.007	21.5313		181.01	81.2999		181.003	76.2972		181.005	84.5551		181.011	81.7196
182.006	14.8299		182.006	22.9451		182.002	25.8722		182.007	21.6931		182.01	81.2662		182.003	76.3361		182.005	84.5593		182.011	81.7562
183.006	14.8932		183.007	22.9832		183.002	25.8963		183.007	21.7484		183.01	81.2798		183.002	76.3089		183.005	84.5471		183.011	81.7019
184.006	15.0066		184.007	23.1136		184.003	26.0963		184.007	21.9001		184.01	81.2995		184.002	76.3506		184.005	84.4911		184.011	81.6918
185.006	15.0415		185.007	23.1397		185.002	26.1362		185.007	21.9593		185.01	81.2872		185.003	76.3328		185.005	84.5759		185.011	81.748
186.006	15.1879		186.007	23.3391		186.002	26.3558		186.007	22.1569		186.01	81.3492		186.003	76.3301		186.005	84.5401		186.011	81.7396
187.007	15.1861		187.006	23.3135		187.002	26.3554		187.008	22.1197		187.01	81.2824		187.003	76.3662		187.006	84.5764		187.011	81.7514
188.006	15.3532		188.007	23.4899		188.002	26.5851		188.007	22.3394		188.01	81.3504		188.003	76.3797		188.005	84.5874		188.011	81.7671
189.006	15.4195		189.007	23.7115		189.003	26.7261		189.007	22.4111		189.01	81.3391		189.003	76.3801		189.005	84.5738		189.011	81.6992
190.007	15.4351		190.007	23.7018		190.003	26.7371		190.008	22.4557		190.01	81.2967		190.003	76.3762		190.006	84.5617		190.012	81.7207
191.007	15.6284		191.007	23.9338		191.002	26.9657		191.008	22.6557		191.011	81.3213		191.003	76.3647		191.005	84.6049		191.012	81.7603
192.007	15.6344		192.007	23.9767		192.002	26.9592		192.008	22.6601		192.011	81.3416		192.003	76.3513		192.006	84.5744		192.012	81.7721
193.006	15.7543		193.008	23.997		193.003	27.1386		193.008	22.8411		193.011	81.2853		193.003	76.3494		193.006	84.5696		193.012	81.7113
194.007	15.7624		194.008	24.189		194.003	27.1962		194.008	22.8616		194.011	81.334		194.004	76.3899		194.006	84.5764		194.012	81.7409
195.007	15.9233		195.007	24.1864		195.003	27.406		195.008	23.0532		195.01	81.34		195.003	76.4116		195.006	84.5772		195.012	81.7864
196.007	15.9137		196.007	24.4327		196.003	27.398		196.008	23.0487		196.011	81.4203		196.003	76.3764		196.006	84.5869		196.012	81.7688
197.007	16.1012		197.008	24.5139		197.002	27.6314		197.008	23.2563		197.011	81.322		197.003	76.357		197.006	84.5784		197.012	81.7477
198.007	16.0824		198.007	24.5313		198.002	27.5957		198.008	23.2011		198.011	81.3253		198.004	76.3625		198.006	84.5938		198.012	81.7578
199.007	16.2503		199.007	24.7808		199.003	27.8924		199.009	23.4697		199.011	81.3586		199.003	76.412		199.006	84.6146		199.012	81.7846
200.007	16.2102		200.008	24.7661		200.003	27.8611		200.008	23.4281		200.011	81.362		200.003	76.4012		200.006	84.5639		200.012	81.7215
201.007	16.4051		201.009	24.7917		201.004	28.0332		201.008	23.6151		201.011	81.3255		201.003	76.4319		201.006	84.6419		201.012	81.8016
202.007	16.4246		202.008	25.0187		202.004	28.1335		202.008	23.681		202.011	81.3253		202.003	76.3767		202.006	84.5425		202.012	81.7193
203.007	16.556		203.009	25.0161		203.004	28.2873		203.009	23.8237		203.011	81.3287		203.004	76.4574		203.006	84.5818		203.012	81.7294
204.008	16.6028		204.008	25.2662		204.004	28.3878		204.009	23.9317		204.011	81.3958		204.004	76.4278		204.006	84.6029		204.012	81.734
205.008	16.6699		205.008	25.2686		205.004	28.4148		205.009	23.9585		205.011	81.3245		205.004	76.4089		205.006	84.6015		205.012	81.7401
206.008	16.8246		206.008	25.485		206.004	28.6676		206.009	24.1504		206.011	81.3206		206.004	76.4611		206.006	84.6158		206.012	81.7379
207.008	16.7927		207.009	25.4623		207.004	28.6196		207.009	24.1342		207.011	81.368		207.003	76.4412		207.007	84.5968		207.012	81.7637
208.008	16.9961		208.008	25.5666		208.004	28.8968		208.009	24.3798		208.012	81.3356		208.004	76.4587		208.006	84.608		208.013	81.7419
209.007	17.0668		209.008	25.7013		209.004	28.9762		209.008	24.455		209.011	81.363		209.004	76.4602		209.006	84.5722		209.012	81.7935
210.008	17.1111		210.008	25.7567		210.004	29.015		210.01	24.4626		210.012	81.3462		210.004	76.4303		210.007	84.6083		210.013	81.7798
211.007	17.159		211.008	25.9691		211.004	29.1549		211.009	24.604		211.011	81.4062		211.004	76.4932		211.006	84.5687		211.012	81.7756
212.008	17.2124		212.009	25.9361		212.004	29.191		212.009	24.684		212.012	81.3878		212.004	76.3871		212.007	84.5974		212.013	81.7681
213.008	17.225		213.009	26.1498		213.004	29.2831		213.009	24.6658		213.012	81.4096		213.005	76.5098		213.006	84.606		213.013	81.768
214.008	17.4774		214.009	26.1573		214.005	29.5653		214.009	24.9488		214.011	81.4144		214.005	76.4691		214.007	84.5976		214.012	81.7289
215.007	17.3775		215.01	26.3068		215.005	29.4384		215.009	24.8379		215.011	81.3939		215.004	76.4713		215.006	84.5934		215.013	81.7499
216.008	17.6144		216.009	26.3986		216.004	29.8026		216.009	25.1981		216.012	81.4132		216.005	76.473		216.007	84.5975		216.013	81.772
217.008	17.5449		217.009	26.3834		217.005	29.6948		217.009	25.1087		217.012	81.3683		217.004	76.4765		217.007	84.5835		217.013	81.764
218.008	17.7647		218.009	26.6226		218.004	29.9897		218.009	25.3893		218.012	81.3992		218.005	76.4348		218.007	84.6104		218.013	81.8207
219.008	17.7132		219.01	26.5676		219.005	29.8817		219.01	25.2669		219.012	81.2457		219.005	76.4554		219.007	84.5829		219.013	81.7509
220.008	17.9191		220.009	26.8125		220.005	30.209		220.01	25.5511		220.012	81.386		220.005	76.461		220.007	84.5734		220.013	81.7164
221.008	17.8715		221.009	26.8278		221.005	30.1222		221.009	25.4505		221.012	81.4062		221.005	76.4455		221.007	84.5628		221.012	81.7302
222.008	18.1224		222.01	26.9547		222.005	30.4183		222.009	25.7738		222.012	81.3297		222.005	76.5432		222.007	84.6202		222.013	81.7664
223.008	18.0241		223.01	27.0301		223.005	30.3494		223.009	25.6279		223.012	81.4209		223.005	76.4888		223.007	84.5646		223.013	81.7641
224.008	18.2708		224.01	27.1592		224.005	30.6381		224.01	25.9441		224.012	81.4102		224.005	76.4878		224.007	84.6403		224.013	81.8088
225.009	18.2082		225.01	27.2049		225.005	30.5572		225.01	25.8719		225.012	81.437		225.005	76.5188		225.007	84.6514		225.014	81.823
226.009	18.4203		226.009	27.4179		226.005	30.8301		226.01	26.1064		226.012	81.4558		226.005	76.5408		226.007	84.6008		226.013	81.7916
227.009	18.404		227.009	27.369		227.005	30.7655		227.01	26.0788		227.012	81.3924		227.006	76.4926		227.008	84.6208		227.014	81.8193
228.008	18.5411		228.009	27.5893		228.005	31.0167		228.01	26.2765		228.012	81.4112		228.006	76.5653		228.007	84.611		228.013	81.7438
229.009	18.5931		229.009	27.575		229.005	31.0874		229.01	26.3214		229.012	81.4318		229.006	76.5388		229.008	84.645		229.013	81.8105
230.009	18.6326		230.009	27.6905		230.005	31.1403		230.011	26.3873		230.013	81.3839		230.006	76.5036		230.008	84.5875		230.014	81.7413
231.009	18.7435		231.01	27.7796		231.005	31.2495		231.01	26.4795		231.012	81.4597		231.005	76.5303		231.008	84.6121		231.014	81.815
232.009	18.8147		232.01	27.8368		232.005	31.3518		232.01	26.5765		232.012	81.4606		232.006	76.5423		232.008	84.5976		232.014	81.7644
233.009	18.885		233.01	27.8532		233.005	31.4179		233.01	26.7029		233.012	81.4798		233.005	76.5958		233.007	84.5901		233.014	81.7585
234.009	19.0115		234.01	28.1235		234.006	31.6373		234.01	26.8345		234.013	81.4477		234.006	76.5746		234.008	84.6292		234.014	81.7723
235.009	19.0258		235.01	28.0883		235.005	31.607		235.011	26.8198		235.013	81.4375		235.006	76.543		235.008	84.6122		235.015	81.7535
236.009	19.1326		236.009	28.3414		236.005	31.7889		236.01	26.9593		236.012	81.4314		236.006	76.575		236.007	84.6302		236.013	81.832
237.009	19.1624		237.009	28.2524		237.005	31.8199		237.01	26.9976		237.012	81.3905		237.006	76.5497		237.007	84.5638		237.013	81.7289
238.009	19.3167		238.01	28.5055		238.005	32.0229		238.01	27.2057		238.013	81.3706		238.006	76.5677		238.008	84.6059		238.014	81.769
239.009	19.3172		239.01	28.4796		239.005	32.0218		239.01	27.2271		239.013	81.4281		239.006	76.556		239.007	84.5887		239.014	81.8028
240.009	19.463		240.01	28.6952		240.005	32.2173		240.011	27.379		240.013	81.4752		240.006	76.5802		240.008	84.5943		240.014	81.7447
241.01	19.4523		241.01	28.7323		241.005	32.228		241.011	27.3656		241.013	81.3887		241.006	76.5561		241.008	84.6172		241.014	81.8464
242.01	19.6411		242.01	28.6944		242.005	32.3357		242.011	27.5573		242.013	81.4324		242.006	76.5838		242.008	84.6229		242.014	81.8106
243.01	19.73		243.01	28.938		243.006	32.5043		243.011	27.6946		243.013	81.4782		243.006	76.564		243.008	84.6454		243.014	81.8078
244.01	19.7462		244.011	29.0435		244.006	32.6007		244.011	27.7196		244.013	81.4411		244.006	76.551		244.008	84.6663		244.015	81.8339
245.01	19.8396		245.01	29.048		245.006	32.7002		245.011	27.8355		245.013	81.4184		245.006	76.5783		245.008	84.6169		245.015	81.7696
246.01	19.8311		246.011	29.221		246.006	32.7311		246.011	27.8626		246.013	81.4993		246.007	76.6173		246.008	84.6627		246.014	81.8127
247.01	20.0652		247.011	29.3294		247.006	32.9665		247.012	28.1242		247.014	81.4267		247.006	76.6106		247.009	84.6286		247.015	81.8266
248.01	20.1076		248.011	29.0991		248.006	32.9606		248.011	28.1043		248.014	81.4389		248.007	76.6012		248.008	84.6948		248.015	81.8584
249.01	19.9688		249.011	29.4291		249.006	32.9347		249.011	28.0407		249.013	81.4357		249.007	76.569		249.008	84.6125		249.014	81.7376
250.01	20.1171		250.011	29.4097		250.006	33.0696		250.011	28.1568		250.013	81.4586		250.007	76.5865		250.009	84.6149		250.015	81.8185
251.01	20.3262		251.012	29.6436		251.006	33.2974		251.011	28.3776		251.013	81.4611		251.007	76.5946		251.008	84.653		251.014	81.7919
252.01	20.3476		252.012	29.5367		252.007	33.2963		252.011	28.3779		252.013	81.4506		252.007	76.5653		252.008	84.6254		252.015	81.7829
253.01	20.4336		253.011	29.8343		253.007	33.4826		253.011	28.5495		253.014	81.468		253.007	76.6138		253.009	84.6264		253.015	81.7862
254.01	20.4809		254.011	29.9258		254.006	33.5309		254.011	28.5728		254.013	81.4601		254.007	76.5974		254.009	84.6346		254.015	81.7474
255.01	20.5905		255.012	29.8343		255.006	33.6064		255.011	28.698		255.014	81.4444		255.007	76.6342		255.009	84.6399		255.015	81.8013
256.01	20.716		256.012	29.9691		256.007	33.741		256.011	28.8127		256.014	81.4475		256.007	76.5852		256.009	84.603		256.015	81.7784
257.01	20.658		257.012	30.0663		257.007	33.7136		257.011	28.7945		257.014	81.4187		257.007	76.6044		257.009	84.621		257.015	81.794
258.01	20.8095		258.012	30.1176		258.007	33.8683		258.012	28.9248		258.014	81.4212		258.007	76.629		258.009	84.6743		258.015	81.783
259.01	20.8712		259.012	30.3214		259.007	33.9731		259.012	29.0502		259.014	81.4448		259.007	76.623		259.009	84.6427		259.015	81.7892
260.011	20.9838		260.012	30.2212		260.007	34.0344		260.012	29.1083		260.015	81.4159		260.007	76.5821		260.01	84.6479		260.016	81.8594
261.01	21.0235		261.012	30.4538		261.007	34.1968		261.011	29.2153		261.014	81.4629		261.007	76.6111		261.009	84.6231		261.015	81.7829
262.011	21.1312		262.012	30.6832		262.007	34.372		262.012	29.3734		262.014	81.4985		262.007	76.5966		262.009	84.5973		262.016	81.759
263.011	21.173		263.012	30.4972		263.007	34.3446		263.012	29.377		263.014	81.4055		263.007	76.6382		263.009	84.6258		263.016	81.7726
264.011	21.2517		264.012	30.6854		264.007	34.4473		264.012	29.4803		264.014	81.4889		264.007	76.6475		264.01	84.5893		264.015	81.7515
265.011	21.3376		265.012	30.7173		265.007	34.5198		265.012	29.563		265.014	81.4583		265.007	76.5779		265.01	84.5958		265.016	81.7568
266.011	21.38		266.012	30.9272		266.007	34.6492		266.013	29.6516		266.015	81.4037		266.007	76.645		266.01	84.6567		266.016	81.7655
267.011	21.4773		267.012	30.8597		267.008	34.7289		267.013	29.741		267.015	81.4763		267.007	76.5945		267.01	84.6105		267.016	81.7868
268.011	21.5217		268.012	31.0904		268.007	34.8423		268.012	29.7867		268.015	81.4164		268.008	76.6325		268.01	84.6727		268.016	81.7995
269.011	21.674		269.012	31.0497		269.008	34.9		269.012	29.8676		269.014	81.5199		269.008	76.6424		269.01	84.6046		269.016	81.7559
270.012	21.6751		270.012	31.312		270.008	34.9942		270.013	29.9465		270.015	81.4648		270.007	76.6502		270.01	84.6143		270.017	81.7452
271.012	21.7928		271.012	31.1985		271.007	35.0144		271.012	30.0231		271.015	81.4376		271.008	76.6238		271.01	84.5896		271.016	81.7577
272.011	21.8757		272.013	31.4066		272.008	35.1951		272.012	30.1678		272.015	81.4407		272.008	76.614		272.01	84.6693		272.016	81.8061
273.012	21.9495		273.013	31.4299		273.008	35.2724		273.013	30.2361		273.015	81.4334		273.008	76.6504		273.01	84.5824		273.017	81.7457
274.012	21.9718		274.012	31.5323		274.008	35.3298		274.013	30.3149		274.015	81.4463		274.008	76.6086		274.01	84.6287		274.016	81.7292
275.011	22.1264		275.012	31.6957		275.008	35.4896		275.012	30.4539		275.015	81.51		275.007	76.6472		275.01	84.5815		275.017	81.7631
276.012	22.1169		276.013	31.6683		276.008	35.4909		276.013	30.4743		276.016	81.4824		276.008	76.6339		276.011	84.6165		276.017	81.767
277.012	22.3177		277.013	31.7533		277.008	35.6841		277.014	30.6452		277.015	81.4484		277.008	76.6564		277.011	84.6163		277.017	81.8022
278.011	22.2515		278.013	31.8999		278.008	35.6823		278.013	30.635		278.015	81.4396		278.008	76.6769		278.01	84.5875		278.017	81.6941
279.012	22.4245		279.013	31.8543		279.008	35.798		279.013	30.7595		279.015	81.4425		279.008	76.6431		279.01	84.6196		279.017	81.7673
280.012	22.4057		280.012	32.0564		280.008	35.8643		280.013	30.809		280.015	81.4632		280.008	76.6544		280.011	84.6402		280.016	81.7834
281.012	22.6194		281.013	32.2631		281.008	36.1036		281.014	31.0268		281.016	81.5393		281.008	76.6474		281.011	84.6432		281.017	81.7799
282.012	22.5838		282.013	32.1291		282.008	36.0035		282.014	30.9486		282.016	81.5207		282.008	76.6061		282.011	84.6402		282.017	81.7932
283.012	22.6519		283.013	32.3201		283.008	36.1575		283.013	31.1017		283.015	81.4209		283.009	76.6233		283.011	84.613		283.017	81.8014
284.012	22.778		284.012	32.238		284.008	36.2067		284.014	31.1221		284.016	81.4776		284.009	76.6612		284.011	84.6471		284.017	81.752
285.012	22.809		285.013	32.4963		285.009	36.3371		285.013	31.2473		285.015	81.4983		285.009	76.6361		285.01	84.5921		285.017	81.7381
286.011	22.8639		286.013	32.3921		286.009	36.3168		286.012	31.2948		286.014	81.4753		286.009	76.679		286.01	84.6356		286.016	81.7328
287.012	22.9671		287.013	32.6295		287.009	36.5377		287.013	31.4434		287.015	81.4946		287.008	76.6652		287.011	84.5594		287.017	81.6829
288.013	22.9692		288.013	32.5042		288.009	36.4431		288.014	31.3776		288.016	81.4378		288.009	76.6707		288.011	84.6129		288.017	81.7176
289.013	23.1203		289.012	32.6791		289.008	36.6466		289.014	31.556		289.016	81.5221		289.009	76.6535		289.012	84.5889		289.017	81.7304
290.013	23.1501		290.013	32.9355		290.009	36.7366		290.014	31.6092		290.016	81.4833		290.009	76.6632		290.012	84.6289		290.017	81.7315
291.012	23.2768		291.013	32.8637		291.009	36.8377		291.014	31.7538		291.016	81.4736		291.01	76.6732		291.011	84.5816		291.017	81.7158
292.012	23.2732		292.013	32.9879		292.008	36.8806		292.014	31.7392		292.016	81.4835		292.009	76.6769		292.011	84.6346		292.017	81.749
293.012	23.4926		293.013	33.1478		293.009	37.0778		293.014	31.9596		293.016	81.4779		293.009	76.7078		293.011	84.5635		293.017	81.7261
294.013	23.4553		294.014	33.1034		294.009	37.0243		294.014	31.9038		294.016	81.4599		294.01	76.7336		294.012	84.6736		294.017	81.799
295.013	23.6332		295.014	33.2668		295.009	37.249		295.014	32.1275		295.017	81.4963		295.01	76.6752		295.012	84.6045		295.018	81.7532
296.013	23.594		296.013	33.23		296.009	37.1333		296.014	32.042		296.017	81.51		296.009	76.6946		296.012	84.6303		296.018	81.7716
297.013	23.6832		297.014	33.4274		297.009	37.3658		297.014	32.2069		297.017	81.5396		297.01	76.6981		297.012	84.6109		297.018	81.7567
298.013	23.7089		298.014	33.3641		298.009	37.3359		298.014	32.2393		298.017	81.5439		298.01	76.6901		298.012	84.6216		298.018	81.7321
299.013	23.8148		299.013	33.4049		299.009	37.4195		299.015	32.3042		299.017	81.4818		299.01	76.702		299.012	84.6196		299.018	81.722
300.013	23.9506		300.014	33.6575		300.009	37.6461		300.014	32.4488		300.017	81.4856		300.009	76.6914		300.012	84.6658		300.018	81.7421
301.014	24.0883		301.014	33.5604		301.009	37.6968		301.015	32.6122		301.017	81.5163		301.01	76.6894		301.012	84.6176		301.018	81.7322
302.013	24.0125		302.014	33.7771		302.009	37.6978		302.014	32.5921		302.017	81.4771		302.01	76.7007		302.012	84.6666		302.018	81.7813
303.013	24.0914		303.014	33.7161		303.01	37.7553		303.014	32.6343		303.017	81.4969		303.01	76.6946		303.012	84.6346		303.018	81.7773
304.014	24.1692		304.014	33.9783		304.009	37.9198		304.015	32.7585		304.017	81.5023		304.01	76.7227		304.012	84.6249		304.018	81.7271
305.013	24.2398		305.014	33.8745		305.01	37.9276		305.014	32.7851		305.017	81.5261		305.01	76.6747		305.011	84.6162		305.018	81.7338
306.014	24.3987		306.014	34.1465		306.009	38.1233		306.014	32.9898		306.017	81.5291		306.01	76.6931		306.012	84.6019		306.019	81.7144
307.014	24.3644		307.014	34.067		307.009	38.0598		307.015	32.9182		307.017	81.5393		307.01	76.6682		307.013	84.6553		307.018	81.8023
308.013	24.5295		308.015	34.3051		308.01	38.2708		308.014	33.105		308.017	81.4757		308.01	76.7075		308.012	84.617		308.018	81.7406
309.013	24.4785		309.014	34.1754		309.009	38.2144		309.015	33.0672		309.017	81.503		309.01	76.7326		309.012	84.6137		309.018	81.7469
310.013	24.6687		310.014	34.4208		310.01	38.4471		310.015	33.3008		310.017	81.5649		310.01	76.7167		310.012	84.658		310.019	81.78
311.014	24.618		311.015	34.3419		311.01	38.3602		311.015	33.2246		311.018	81.5077		311.01	76.6848		311.012	84.6302		311.019	81.7444
312.014	24.8466		312.014	34.578		312.01	38.6482		312.015	33.4853		312.018	81.5598		312.01	76.7185		312.012	84.6093		312.019	81.7678
313.014	24.7486		313.015	34.5359		313.01	38.5232		313.015	33.4172		313.017	81.5133		313.011	76.6814		313.013	84.6163		313.019	81.7205
314.014	24.9431		314.015	34.6745		314.01	38.7663		314.015	33.6078		314.017	81.5503		314.011	76.7056		314.012	84.6469		314.019	81.7778
315.014	24.9231		315.015	34.7318		315.01	38.7128		315.015	33.5526		315.017	81.5343		315.011	76.7124		315.013	84.6341		315.019	81.7305
316.014	25.0461		316.015	34.7171		316.01	38.7912		316.015	33.6977		316.017	81.5104		316.01	76.7595		316.012	84.6219		316.019	81.7313
317.015	25.1021		317.015	34.8984		317.01	38.8829		317.016	33.7357		317.018	81.5004		317.01	76.7199		317.013	84.6448		317.019	81.7777
318.014	25.2216		318.015	34.8737		318.01	38.977		318.015	33.8327		318.018	81.5523		318.011	76.7157		318.013	84.658		318.019	81.7691
319.014	25.1938		319.015	35.0356		319.01	39.0022		319.016	33.8461		319.018	81.5549		319.011	76.7122		319.013	84.6091		319.02	81.695
320.014	25.2845		320.015	35.026		320.01	39.1372		320.016	33.9772		320.018	81.5204		320.011	76.6985		320.013	84.5812		320.02	81.7343
321.014	25.3951		321.016	35.197		321.01	39.2303		321.015	34.0746		321.017	81.5297		321.01	76.7598		321.012	84.6011		321.019	81.6908
322.014	25.4328		322.015	35.1863		322.01	39.2723		322.015	34.0975		322.018	81.6029		322.011	76.708		322.013	84.6149		322.019	81.7306
323.014	25.4826		323.015	35.3514		323.01	39.3737		323.016	34.1996		323.018	81.5036		323.011	76.7424		323.013	84.584		323.019	81.6907
324.014	25.632		324.015	35.3219		324.01	39.458		324.015	34.2627		324.018	81.5333		324.011	76.7406		324.013	84.5958		324.019	81.7159
325.014	25.6897		325.015	35.4365		325.011	39.5551		325.015	34.3935		325.018	81.5568		325.011	76.7209		325.013	84.6253		325.019	81.7316
326.015	25.6847		326.016	35.5185		326.01	39.5977		326.016	34.4037		326.018	81.4918		326.011	76.7144		326.014	84.5774		326.019	81.7138
327.015	25.7964		327.015	35.4679		327.011	39.6528		327.016	34.5042		327.018	81.5168		327.012	76.6962		327.014	84.5833		327.02	81.6909
328.015	25.7952		328.016	35.717		328.011	39.7139		328.016	34.5665		328.018	81.5265		328.012	76.7819		328.014	84.6476		328.019	81.7607
329.015	25.9534		329.016	35.6322		329.011	39.8244		329.016	34.6655		329.018	81.5817		329.011	76.7451		329.014	84.6355		329.02	81.7723
330.014	25.9279		330.015	35.8154		330.011	39.9065		330.016	34.728		330.019	81.5864		330.011	76.7028		330.013	84.6663		330.02	81.7743
331.015	26.0781		331.016	35.781		331.011	39.9557		331.017	34.8128		331.019	81.5173		331.011	76.7317		331.014	84.5996		331.02	81.7066
332.015	26.1011		332.016	36.0149		332.011	40.0459		332.016	34.9248		332.018	81.4919		332.011	76.7332		332.014	84.635		332.019	81.6936
333.015	26.2155		333.017	35.8793		333.011	40.1094		333.016	34.9572		333.019	81.538		333.012	76.7326		333.014	84.6014		333.02	81.7245
334.015	26.2245		334.016	36.125		334.012	40.1838		334.017	35.02		334.019	81.593		334.012	76.748		334.014	84.6618		334.02	81.732
335.016	26.3659		335.016	36.1021		335.012	40.2616		335.017	35.11		335.019	81.5128		335.012	76.7969		335.014	84.6414		335.02	81.7499
336.015	26.4231		336.016	36.2667		336.011	40.3708		336.016	35.2197		336.019	81.5384		336.012	76.7531		336.014	84.6392		336.02	81.7282
337.015	26.5282		337.016	36.2309		337.011	40.4135		337.016	35.2658		337.019	81.5585		337.012	76.778		337.014	84.6555		337.02	81.782
338.015	26.5622		338.017	36.4538		338.012	40.522		338.016	35.3385		338.019	81.5279		338.012	76.7534		338.014	84.6746		338.02	81.731
339.015	26.5513		339.017	36.3285		339.012	40.5038		339.017	35.3536		339.019	81.5098		339.012	76.7551		339.014	84.6287		339.021	81.7698
340.015	26.6173		340.016	36.5658		340.011	40.6229		340.016	35.4713		340.019	81.5149		340.012	76.7262		340.014	84.6405		340.02	81.739
341.015	26.7803		341.017	36.5453		341.012	40.7189		341.017	35.5683		341.019	81.5163		341.012	76.8032		341.014	84.6107		341.021	81.7432
342.016	26.7257		342.017	36.6069		342.011	40.7306		342.017	35.5737		342.019	81.5309		342.012	76.7479		342.014	84.5935		342.021	81.6644
343.017	26.9202		343.017	36.7362		343.012	40.904		343.017	35.7468		343.019	81.5424		343.012	76.767		343.015	84.6563		343.021	81.7679
344.016	27.0322		344.016	36.7124		344.012	41.0071		344.017	35.856		344.019	81.617		344.012	76.7737		344.015	84.6541		344.021	81.8026
345.015	26.9783		345.016	36.8769		345.012	41.0424		345.017	35.8567		345.019	81.5695		345.013	76.7705		345.014	84.5993		345.021	81.6713
346.016	27.1387		346.016	36.7973		346.012	41.1059		346.017	35.941		346.02	81.5358		346.012	76.8154		346.015	84.6198		346.021	81.7538
347.016	27.1105		347.016	37.0185		347.012	41.1418		347.017	35.9986		347.02	81.5738		347.013	76.8253		347.015	84.6266		347.021	81.742
348.016	27.2232		348.017	37.1159		348.012	41.2591		348.017	36.1157		348.019	81.649		348.012	76.8188		348.015	84.6344		348.021	81.7422
349.016	27.2602		349.017	37.0287		349.012	41.2624		349.017	36.1154		349.02	81.5919		349.013	76.752		349.015	84.6196		349.021	81.7378
350.016	27.2623		350.017	37.0203		350.012	41.2718		350.017	36.1133		350.02	81.6144		350.013	76.7668		350.015	84.6031		350.021	81.7114
351.016	27.4258		351.017	37.2184		351.013	41.4608		351.017	36.2745		351.02	81.545		351.012	76.7873		351.015	84.6269		351.021	81.7212
352.016	27.4203		352.017	37.2961		352.012	41.4725		352.017	36.2947		352.02	81.5704		352.012	76.7495		352.015	84.6028		352.021	81.7239
353.016	27.4422		353.017	37.3645		353.013	41.542		353.017	36.3476		353.02	81.5734		353.013	76.7934		353.014	84.5981		353.021	81.6834
354.017	27.6414		354.017	37.5425		354.012	41.7213		354.018	36.5493		354.021	81.6107		354.013	76.7937		354.015	84.6363		354.022	81.7408
355.016	27.513		355.017	37.2904		355.013	41.5346		355.017	36.3964		355.02	81.5571		355.013	76.7964		355.015	84.6218		355.021	81.6596
356.016	27.772		356.018	37.4642		356.013	41.7723		356.017	36.5914		356.02	81.5951		356.013	76.7886		356.015	84.6077		356.021	81.6783
357.017	27.6881		357.017	37.599		357.012	41.7795		357.018	36.6185		357.02	81.5842		357.013	76.7826		357.015	84.6508		357.022	81.7346
358.017	27.8672		358.018	37.6871		358.013	41.9485		358.018	36.7555		358.02	81.578		358.013	76.7844		358.016	84.6384		358.021	81.7174
359.017	27.8958		359.018	37.7271		359.013	41.963		359.018	36.7844		359.021	81.5671		359.013	76.7823		359.015	84.6276		359.022	81.7515
360.017	28.0142		360.018	37.8151		360.013	42.0868		360.018	36.9034		360.021	81.5853		360.013	76.7739		360.016	84.621		360.022	81.7224
361.017	28.1571		361.018	37.8897		361.013	42.2072		361.019	37.0083		361.021	81.5923		361.014	76.7819		361.016	84.6624		361.022	81.7489
362.016	28.0354		362.018	37.8492		362.013	42.0587		362.018	36.9205		362.02	81.5702		362.014	76.7478		362.015	84.6514		362.022	81.7251
363.017	28.1816		363.018	38.0305		363.013	42.279		363.019	37.0461		363.021	81.6056		363.013	76.8022		363.016	84.6152		363.022	81.6865
364.017	28.1993		364.018	37.9209		364.013	42.2624		364.018	37.1285		364.02	81.5636		364.014	76.778		364.016	84.6384		364.022	81.7375
365.017	28.2261		365.018	38.1635		365.013	42.3588		365.018	37.1581		365.021	81.5947		365.013	76.757		365.016	84.6214		365.022	81.7016
366.017	28.3971		366.018	38.0617		366.013	42.4365		366.018	37.2474		366.021	81.5634		366.014	76.7892		366.016	84.5773		366.022	81.7088
367.017	28.3829		367.018	38.2947		367.014	42.4948		367.019	37.3032		367.021	81.5577		367.014	76.7847		367.016	84.6089		367.022	81.6721
368.017	28.5434		368.018	38.2616		368.013	42.5788		368.019	37.4332		368.021	81.57		368.014	76.7825		368.016	84.6078		368.022	81.7041
369.018	28.5388		369.018	38.3626		369.013	42.6749		369.019	37.4792		369.021	81.5198		369.014	76.7899		369.016	84.624		369.022	81.6921
370.017	28.6725		370.018	38.458		370.014	42.7561		370.019	37.6008		370.021	81.6227		370.014	76.7652		370.016	84.6241		370.022	81.7226
371.017	28.6243		371.019	38.4065		371.013	42.7236		371.019	37.5553		371.021	81.6012		371.014	76.7637		371.016	84.661		371.022	81.7288
372.018	28.8029		372.019	38.6472		372.014	42.914		372.019	37.725		372.021	81.5849		372.014	76.7975		372.017	84.5879		372.022	81.7211
373.017	28.7897		373.019	38.6315		373.014	42.8934		373.018	37.7188		373.021	81.6574		373.014	76.8358		373.016	84.6301		373.022	81.7152
374.017	28.8644		374.018	38.7314		374.014	43.0055		374.019	37.8189		374.022	81.5568		374.014	76.7399		374.017	84.6145		374.023	81.7051
375.018	28.9791		375.019	38.7201		375.014	43.0575		375.019	37.8615		375.021	81.5663		375.014	76.7973		375.017	84.6671		375.022	81.737
376.017	28.9122		376.019	38.8653		376.014	43.0594		376.019	37.8739		376.021	81.5912		376.014	76.7815		376.016	84.6053		376.022	81.687
377.018	29.0711		377.019	38.9182		377.014	43.2174		377.019	38.0175		377.022	81.5769		377.014	76.824		377.017	84.6561		377.023	81.7203
378.017	29.0615		378.019	38.8539		378.014	43.1774		378.019	37.9898		378.021	81.5404		378.014	76.8365		378.016	84.6282		378.023	81.7184
379.018	29.2222		379.019	39.0813		379.014	43.3559		379.019	38.1291		379.021	81.5808		379.015	76.8339		379.017	84.5523		379.023	81.6532
380.017	29.3136		380.019	39.0402		380.014	43.3991		380.019	38.2022		380.022	81.559		380.015	76.8468		380.016	84.635		380.023	81.7567
381.019	29.2773		381.019	39.2065		381.014	43.469		381.02	38.2718		381.022	81.6392		381.015	76.7971		381.017	84.6415		381.023	81.7684
382.018	29.368		382.019	39.0984		382.014	43.4393		382.019	38.2677		382.022	81.6375		382.015	76.814		382.017	84.6013		382.023	81.7001
383.019	29.4161		383.019	39.317		383.014	43.585		383.02	38.4152		383.022	81.6313		383.014	76.8439		383.017	84.6355		383.024	81.6876
384.019	29.465		384.019	39.2855		384.014	43.5784		384.02	38.4027		384.022	81.6062		384.015	76.8172		384.017	84.6397		384.023	81.7324
385.018	29.6179		385.019	39.4295		385.014	43.7638		385.019	38.5557		385.022	81.6373		385.015	76.837		385.017	84.5871		385.023	81.706
386.018	29.5192		386.019	39.3493		386.014	43.656		386.019	38.476		386.022	81.6052		386.015	76.7668		386.017	84.6672		386.023	81.771
387.018	29.7441		387.019	39.5486		387.014	43.9052		387.019	38.6734		387.022	81.6212		387.015	76.8048		387.017	84.6365		387.023	81.7015
388.018	29.7078		388.019	39.6378		388.015	43.8764		388.019	38.7055		388.022	81.5939		388.015	76.8406		388.017	84.6327		388.023	81.6942
389.019	29.8332		389.019	39.5687		389.015	43.9208		389.02	38.7515		389.022	81.6282		389.015	76.8605		389.018	84.6666		389.024	81.7894
390.019	29.7755		390.019	39.6393		390.014	43.9019		390.02	38.7191		390.022	81.6177		390.015	76.8596		390.017	84.6234		390.023	81.6912
391.019	29.9562		391.02	39.7462		391.014	44.104		391.02	38.9287		391.022	81.5873		391.015	76.869		391.018	84.6515		391.024	81.762
392.019	29.9236		392.019	39.7548		392.015	44.05		392.02	38.8828		392.022	81.6526		392.015	76.8542		392.017	84.6582		392.024	81.7367
393.019	30.0776		393.02	39.9451		393.015	44.2411		393.02	39.0673		393.022	81.6649		393.015	76.8535		393.017	84.6291		393.024	81.7421
394.018	30.0311		394.019	39.8785		394.015	44.1782		394.02	39.003		394.022	81.586		394.015	76.8712		394.017	84.6257		394.024	81.6952
395.019	30.2143		395.019	40.016		395.014	44.3343		395.02	39.1948		395.022	81.5954		395.016	76.7995		395.017	84.6498		395.023	81.7258
396.018	30.1468		396.019	40.0336		396.014	44.284		396.02	39.1265		396.022	81.5648		396.015	76.8037		396.017	84.6575		396.024	81.6947
397.019	30.3837		397.02	40.1682		397.015	44.4982		397.02	39.344		397.023	81.6951		397.015	76.8466		397.017	84.6403		397.024	81.7555
398.019	30.2906		398.02	40.102		398.015	44.4075		398.02	39.253		398.022	81.6212		398.016	76.8339		398.018	84.5912		398.024	81.6801
399.019	30.473		399.02	40.3799		399.015	44.631		399.02	39.468		399.022	81.6447		399.016	76.8344		399.018	84.6026		399.024	81.6517
400.018	30.373		400.02	40.201		400.015	44.488		400.019	39.369		400.022	81.6147		400.016	76.8258		400.017	84.7126		400.023	81.7609
401.019	30.4427		401.02	40.3949		401.015	44.6743		401.02	39.4555		401.023	81.6584		401.015	76.8186		401.018	84.586		401.024	81.679
402.018	30.6282		402.02	40.3368		402.015	44.7145		402.019	39.464		402.022	81.6238		402.015	76.8437		402.017	84.6467		402.023	81.7266
403.019	30.5891		403.02	40.5639		403.016	44.7482		403.02	39.4998		403.022	81.632		403.016	76.8508		403.018	84.612		403.023	81.6333
404.019	30.717		404.021	40.4678		404.015	44.818		404.021	39.6886		404.023	81.5292		404.016	76.8899		404.018	84.6328		404.024	81.733
405.019	30.6797		405.02	40.655		405.016	44.8913		405.02	39.6447		405.023	81.6281		405.015	76.8332		405.018	84.5882		405.024	81.6605
406.019	30.8593		406.02	40.5736		406.015	44.9661		406.02	39.8411		406.023	81.6024		406.016	76.8653		406.017	84.6658		406.024	81.7609
407.019	30.7773		407.021	40.7538		407.016	44.9795		407.021	39.838		407.023	81.6481		407.015	76.8146		407.018	84.5929		407.024	81.6871
408.019	30.9879		408.021	40.7519		408.016	45.1067		408.02	39.96		408.023	81.6764		408.016	76.886		408.018	84.6667		408.024	81.7574
409.019	30.8922		409.02	40.8162		409.016	45.0426		409.021	39.9132		409.023	81.5835		409.016	76.8407		409.018	84.5827		409.024	81.6722
410.019	31.1139		410.02	40.8985		410.016	45.2299		410.02	40.0712		410.023	81.6205		410.016	76.854		410.018	84.6565		410.024	81.7792
411.019	30.998		411.02	40.8502		411.016	45.1316		411.021	40.0386		411.023	81.664		411.016	76.8374		411.018	84.6009		411.024	81.6694
412.019	31.2412		412.02	41.0357		412.016	45.3562		412.021	40.2243		412.023	81.663		412.016	76.8088		412.018	84.6474		412.024	81.757
413.02	31.115		413.02	40.9827		413.016	45.289		413.021	40.181		413.023	81.6497		413.016	76.8239		413.019	84.5957		413.024	81.6838
414.02	31.3261		414.021	41.1097		414.016	45.4467		414.021	40.3259		414.023	81.6345		414.016	76.9038		414.019	84.6881		414.024	81.7193
415.02	31.2565		415.02	41.1871		415.016	45.415		415.021	40.263		415.024	81.6305		415.016	76.8586		415.019	84.6254		415.025	81.6603
416.019	31.4311		416.02	41.2127		416.016	45.5238		416.021	40.3966		416.023	81.656		416.016	76.8623		416.018	84.6126		416.024	81.7448
417.02	31.458		417.021	41.3273		417.017	45.612		417.021	40.4976		417.024	81.5827		417.017	76.8575		417.019	84.6395		417.025	81.6952
418.02	31.425		418.021	41.2967		418.016	45.5562		418.021	40.4112		418.024	81.6034		418.016	76.8259		418.018	84.6044		418.025	81.6906
419.02	31.6069		419.022	41.3727		419.017	45.6942		419.021	40.5853		419.023	81.6048		419.017	76.8604		419.019	84.6664		419.025	81.7036
420.02	31.5849		420.021	41.4537		420.016	45.7348		420.021	40.6382		420.023	81.6339		420.017	76.801		420.019	84.5814		420.024	81.6305
421.02	31.6479		421.021	41.3715		421.017	45.7255		421.021	40.6158		421.024	81.6314		421.017	76.87		421.018	84.6589		421.025	81.6932
422.021	31.7222		422.021	41.5528		422.017	45.8376		422.022	40.7431		422.024	81.6811		422.016	76.8437		422.019	84.6369		422.025	81.744
423.021	31.7822		423.022	41.5288		423.017	45.836		423.022	40.7259		423.024	81.6347		423.017	76.8451		423.019	84.6638		423.025	81.7262
424.021	31.8484		424.021	41.6924		424.017	45.9708		424.022	40.8615		424.024	81.6167		424.017	76.8558		424.019	84.6359		424.025	81.6798
425.021	31.8365		425.022	41.6197		425.017	45.9121		425.022	40.8373		425.024	81.6113		425.017	76.8357		425.019	84.6831		425.026	81.7511
426.021	31.9983		426.022	41.8284		426.017	46.0975		426.022	40.9887		426.024	81.6243		426.017	76.8621		426.019	84.6266		426.026	81.6931
427.02	31.8918		427.022	41.747		427.017	46.0202		427.022	40.895		427.024	81.7016		427.017	76.8443		427.019	84.6145		427.026	81.6486
428.021	32.1098		428.021	41.9181		428.017	46.2185		428.022	41.0823		428.024	81.6717		428.017	76.8858		428.019	84.5984		428.026	81.6931
429.021	32.0547		429.021	41.8109		429.017	46.1279		429.022	41.0255		429.025	81.6435		429.017	76.865		429.02	84.6826		429.026	81.7287
430.021	32.1921		430.022	42.067		430.017	46.2994		430.022	41.2125		430.024	81.6567		430.017	76.8718		430.019	84.6226		430.026	81.7013
431.021	32.1585		431.021	41.9413		431.016	46.2251		431.022	41.1107		431.025	81.6389		431.017	76.8892		431.02	84.6565		431.026	81.7412
432.022	32.3205		432.021	42.1641		432.017	46.3987		432.022	41.2883		432.025	81.623		432.017	76.863		432.02	84.6263		432.026	81.7313
433.021	32.3535		433.022	42.1476		433.017	46.3961		433.022	41.3031		433.024	81.6467		433.018	76.8547		433.02	84.6397		433.026	81.6906
434.022	32.3592		434.022	42.2253		434.017	46.4566		434.023	41.3803		434.025	81.635		434.018	76.8987		434.02	84.6418		434.026	81.6867
435.021	32.4274		435.022	42.1774		435.017	46.4654		435.022	41.4102		435.024	81.6237		435.018	76.8558		435.019	84.5832		435.026	81.6654
436.021	32.4722		436.021	42.3396		436.017	46.5655		436.022	41.5005		436.025	81.6151		436.018	76.8849		436.02	84.6486		436.026	81.7052
437.021	32.6153		437.022	42.3449		437.017	46.6206		437.022	41.5707		437.024	81.6608		437.018	76.8786		437.02	84.6307		437.025	81.7151
438.021	32.5311		438.022	42.3516		438.017	46.6114		438.022	41.5077		438.024	81.6252		438.018	76.8668		438.02	84.5603		438.026	81.623
439.022	32.694		439.022	42.5039		439.017	46.7565		439.022	41.6973		439.025	81.663		439.017	76.8568		439.021	84.6402		439.026	81.7108
440.022	32.6861		440.022	42.447		440.018	46.7022		440.023	41.6709		440.025	81.6189		440.018	76.9233		440.021	84.671		440.026	81.7282
441.022	32.8559		441.022	42.5918		441.017	46.8799		441.023	41.8146		441.026	81.6838		441.018	76.8956		441.02	84.6251		441.027	81.7057
442.022	32.7669		442.022	42.523		442.017	46.8054		442.023	41.7417		442.025	81.6378		442.018	76.8438		442.021	84.6042		442.026	81.6388
443.022	32.9781		443.023	42.7388		443.017	46.9959		443.023	41.9163		443.025	81.6814		443.018	76.849		443.02	84.5951		443.027	81.6587
444.022	32.8545		444.022	42.6475		444.017	46.8948		444.023	41.8496		444.025	81.6613		444.018	76.8895		444.021	84.6284		444.026	81.6627
445.022	33.081		445.022	42.8695		445.017	47.1181		445.023	42.0453		445.026	81.663		445.018	76.9109		445.021	84.656		445.027	81.7279
446.022	33.004		446.023	42.8199		446.018	47.039		446.023	41.9585		446.025	81.6524		446.018	76.8689		446.02	84.645		446.027	81.6868
447.022	33.1391		447.022	42.8575		447.018	47.1313		447.024	42.0935		447.026	81.645		447.018	76.9173		447.021	84.5742		447.027	81.6491
448.022	33.1366		448.023	42.9267		448.018	47.1778		448.023	42.1405		448.026	81.6784		448.018	76.8466		448.021	84.6335		448.027	81.6853
449.022	33.1455		449.023	42.8898		449.018	47.1198		449.023	42.1182		449.026	81.5902		449.018	76.8599		449.02	84.623		449.027	81.662
450.022	33.2485		450.023	42.9781		450.017	47.2763		450.023	42.2365		450.026	81.6386		450.018	76.8953		450.021	84.6193		450.027	81.6734
451.022	33.2717		451.023	43.0158		451.018	47.2486		451.023	42.2161		451.026	81.6378		451.018	76.8849		451.021	84.6214		451.027	81.6719
452.022	33.4354		452.023	43.1593		452.018	47.3924		452.024	42.3424		452.026	81.6436		452.018	76.887		452.021	84.5948		452.027	81.6523
453.022	33.3193		453.023	43.1286		453.018	47.3139		453.023	42.3221		453.026	81.6813		453.018	76.8721		453.021	84.6085		453.027	81.6729
454.022	33.5192		454.023	43.271		454.019	47.5451		454.023	42.4935		454.026	81.6815		454.019	76.8388		454.021	84.6535		454.027	81.7137
455.022	33.5036		455.023	43.2892		455.018	47.4902		455.023	42.4829		455.026	81.6696		455.019	76.8622		455.021	84.5259		455.027	81.6068
456.022	33.604		456.023	43.258		456.019	47.5468		456.023	42.5519		456.026	81.6667		456.019	76.9008		456.021	84.6586		456.027	81.7531
457.022	33.5737		457.024	43.2362		457.019	47.538		457.023	42.4798		457.026	81.6669		457.019	76.88		457.021	84.6244		457.027	81.6945
458.023	33.7172		458.023	43.434		458.019	47.7103		458.024	42.6915		458.026	81.674		458.019	76.8952		458.022	84.6471		458.027	81.7386
459.023	33.6721		459.024	43.3794		459.019	47.6091		459.024	42.5945		459.026	81.6922		459.019	76.9242		459.022	84.6464		459.027	81.7082
460.023	33.8041		460.024	43.6064		460.019	47.7889		460.024	42.7575		460.026	81.6921		460.019	76.91		460.022	84.6413		460.027	81.7387
461.023	33.7559		461.024	43.4573		461.019	47.7065		461.024	42.6942		461.026	81.6837		461.019	76.8742		461.022	84.6522		461.027	81.6902
462.023	33.918		462.024	43.7185		462.019	47.9027		462.024	42.8566		462.027	81.6759		462.019	76.9309		462.022	84.5954		462.028	81.6962
463.023	33.8072		463.024	43.586		463.019	47.8194		463.024	42.7485		463.026	81.6409		463.019	76.9128		463.022	84.6327		463.028	81.6521
464.023	34.0501		464.024	43.6748		464.019	48.0121		464.024	42.9975		464.027	81.6987		464.019	76.8826		464.022	84.6072		464.028	81.6619
465.023	34.0966		465.024	43.7171		465.019	47.9753		465.024	42.9591		465.026	81.6592		465.02	76.912		465.022	84.6757		465.028	81.7172
466.024	33.9343		466.024	43.8567		466.019	47.9658		466.025	42.9494		466.027	81.6444		466.02	76.9055		466.022	84.6471		466.029	81.7017
467.024	34.0867		467.024	43.7764		467.019	48.0582		467.024	43.0451		467.027	81.6519		467.019	76.919		467.022	84.6761		467.028	81.7038
468.023	34.1588		468.024	43.9461		468.019	48.1634		468.024	43.1926		468.027	81.6811		468.019	76.8922		468.022	84.6269		468.028	81.6767
469.023	34.2152		469.024	43.9463		469.019	48.1931		469.024	43.181		469.027	81.6603		469.02	76.8671		469.022	84.6216		469.028	81.6362
470.023	34.2825		470.024	44.0295		470.019	48.2457		470.025	43.2641		470.027	81.6912		470.02	76.8896		470.022	84.6165		470.028	81.6733
471.023	34.2743		471.024	43.9571		471.02	48.188		471.024	43.1567		471.027	81.6643		471.02	76.8712		471.022	84.6543		471.028	81.6684
472.024	34.3693		472.024	44.128		472.019	48.3103		472.025	43.3623		472.027	81.6824		472.019	76.908		472.022	84.6034		472.028	81.6377
473.024	34.5272		473.024	44.0963		473.02	48.3924		473.025	43.4114		473.027	81.6655		473.02	76.8848		473.023	84.6629		473.028	81.7348
474.024	34.402		474.025	44.1873		474.02	48.39		474.025	43.4176		474.027	81.6933		474.02	76.9042		474.023	84.5891		474.029	81.6489
475.024	34.5797		475.025	44.2482		475.019	48.4773		475.025	43.4805		475.027	81.6446		475.02	76.9222		475.022	84.6482		475.028	81.698
476.024	34.5168		476.024	44.2183		476.02	48.4405		476.025	43.4829		476.027	81.651		476.02	76.9516		476.023	84.583		476.029	81.6197
477.024	34.6672		477.025	44.3236		477.02	48.5651		477.025	43.6277		477.028	81.7043		477.02	76.8775		477.023	84.6313		477.029	81.7134
478.023	34.591		478.024	44.3062		478.019	48.5145		478.024	43.5561		478.027	81.7066		478.02	76.8963		478.022	84.6665		478.028	81.6771
479.023	34.6826		479.025	44.4105		479.02	48.6178		479.025	43.6746		479.027	81.731		479.02	76.9076		479.022	84.6101		479.029	81.6759
480.024	34.7942		480.025	44.4632		480.02	48.665		480.025	43.7154		480.028	81.7113		480.021	76.8635		480.023	84.6078		480.029	81.6728
481.024	34.8063		481.025	44.5261		481.02	48.7389		481.025	43.7845		481.027	81.7284		481.021	76.9474		481.023	84.5997		481.029	81.6871
482.024	34.9396		482.025	44.5089		482.02	48.7454		482.025	43.8089		482.028	81.609		482.02	76.9015		482.023	84.6517		482.029	81.6945
483.024	34.8981		483.025	44.6555		483.02	48.779		483.025	43.8393		483.028	81.6868		483.02	76.9247		483.023	84.606		483.029	81.6288
484.024	35.0242		484.025	44.5839		484.02	48.8539		484.025	43.9147		484.028	81.7014		484.02	76.9331		484.023	84.6311		484.029	81.6956
485.024	34.9586		485.025	44.7773		485.02	48.9071		485.025	43.9836		485.028	81.6351		485.02	76.9068		485.023	84.6583		485.029	81.676
486.024	35.1161		486.025	44.7174		486.021	48.9173		486.026	44.0037		486.028	81.6331		486.021	76.8948		486.023	84.6428		486.029	81.671
487.024	35.0773		487.025	44.8264		487.021	48.9925		487.025	44.0842		487.028	81.6975		487.021	76.8764		487.023	84.6143		487.029	81.6686
488.024	35.2212		488.026	44.8491		488.021	49.038		488.026	44.0893		488.028	81.6618		488.021	76.9326		488.023	84.6168		488.029	81.6489
489.024	35.1794		489.025	44.9304		489.021	49.0745		489.025	44.1566		489.027	81.6182		489.021	76.8892		489.023	84.6187		489.029	81.6742
490.025	35.3		490.026	44.9033		490.021	49.1201		490.026	44.1585		490.028	81.6471		490.021	76.9544		490.024	84.6127		490.029	81.6223
491.025	35.3379		491.025	45.064		491.021	49.2005		491.026	44.2901		491.028	81.7027		491.021	76.9352		491.024	84.5741		491.029	81.638
492.024	35.2874		492.026	44.9565		492.021	49.1565		492.026	44.2455		492.028	81.6734		492.021	76.9174		492.023	84.6713		492.029	81.6803
493.025	35.4774		493.026	45.1097		493.021	49.322		493.026	44.4466		493.029	81.7006		493.021	76.9073		493.024	84.642		493.03	81.6903
494.025	35.3996		494.026	45.0736		494.021	49.2763		494.026	44.3395		494.029	81.6836		494.021	76.9384		494.023	84.6192		494.03	81.6083
495.024	35.533		495.026	45.2138		495.021	49.3537		495.026	44.4512		495.029	81.6317		495.022	76.8959		495.024	84.632		495.03	81.6659
496.025	35.5691		496.026	45.2295		496.021	49.4086		496.026	44.5047		496.028	81.7413		496.022	76.9498		496.024	84.658		496.029	81.6638
497.025	35.5502		497.026	45.2751		497.021	49.3926		497.026	44.4749		497.029	81.7067		497.022	76.9151		497.024	84.6024		497.03	81.6129
498.025	35.6141		498.026	45.2613		498.021	49.4387		498.026	44.5704		498.029	81.6965		498.022	76.9164		498.024	84.605		498.029	81.6734
499.026	35.747		499.026	45.2882		499.021	49.4985		499.026	44.629		499.029	81.6567		499.021	76.9396		499.024	84.6189		499.03	81.665
500.025	35.7537		500.026	45.4317		500.021	49.5803		500.026	44.7049		500.028	81.6989		500.022	76.8962		500.024	84.6143		500.029	81.6736
501.025	35.8323		501.026	45.3713		501.022	49.598		501.026	44.705		501.028	81.7156		501.022	76.9153		501.024	84.6701		501.029	81.707
502.024	35.8141		502.026	45.4821		502.022	49.6525		502.025	44.7533		502.028	81.7035		502.021	76.955		502.023	84.6547		502.029	81.6411
503.026	35.9055		503.026	45.4942		503.021	49.6794		503.027	44.7686		503.029	81.6964		503.021	76.9138		503.024	84.6329		503.03	81.65
504.026	35.9548		504.026	45.586		504.022	49.7805		504.027	44.9093		504.029	81.7166		504.022	76.9338		504.024	84.6198		504.03	81.6079
505.025	35.8882		505.027	45.5171		505.021	49.7113		505.027	44.8195		505.029	81.7189		505.022	76.8906		505.024	84.6257		505.03	81.6399
506.025	36.0793		506.026	45.6677		506.022	49.8439		506.026	44.9555		506.028	81.6711		506.022	76.9286		506.024	84.6398		506.03	81.6671
507.025	36.014		507.026	45.6516		507.022	49.8549		507.026	44.9427		507.028	81.7171		507.022	76.8891		507.024	84.6445		507.03	81.6702
508.026	36.188		508.026	45.6984		508.022	49.905		508.027	45.0255		508.029	81.6471		508.022	76.9532		508.024	84.6171		508.03	81.6346
509.025	36.1307		509.026	45.814		509.022	49.9269		509.026	45.0836		509.028	81.67		509.022	76.932		509.024	84.6245		509.029	81.6252
510.025	36.2652		510.026	45.7653		510.022	49.9876		510.026	45.1282		510.029	81.6988		510.022	76.9122		510.024	84.6637		510.03	81.7029
511.026	36.3031		511.026	45.8851		511.022	50.0273		511.027	45.1437		511.029	81.6944		511.022	76.9544		511.024	84.6446		511.03	81.6801
512.025	36.2793		512.027	45.9354		512.021	50.0682		512.026	45.2218		512.028	81.6954		512.021	76.904		512.024	84.6285		512.029	81.6824
513.025	36.3484		513.027	45.822		513.022	50.066		513.026	45.1824		513.029	81.7367		513.022	76.958		513.024	84.606		513.03	81.6488
514.025	36.448		514.027	45.9983		514.022	50.1942		514.026	45.3509		514.029	81.7216		514.022	76.8948		514.024	84.6638		514.03	81.7052
515.025	36.3983		515.027	45.943		515.022	50.1244		515.026	45.2924		515.028	81.7023		515.022	76.9606		515.024	84.6088		515.03	81.6431
516.026	36.554		516.027	46.1205		516.022	50.2769		516.027	45.4758		516.029	81.7416		516.022	76.938		516.025	84.6416		516.03	81.6658
517.025	36.5135		517.027	46.0703		517.022	50.2688		517.026	45.4087		517.029	81.6871		517.022	76.9324		517.024	84.6045		517.03	81.6218
518.025	36.549		518.027	46.17		518.022	50.301		518.026	45.503		518.028	81.6688		518.022	76.9806		518.024	84.6137		518.03	81.6781
519.025	36.6744		519.027	46.1529		519.022	50.3771		519.027	45.4865		519.029	81.6519		519.022	76.9046		519.024	84.6265		519.03	81.6474
520.026	36.6284		520.027	46.263		520.023	50.3566		520.027	45.5408		520.029	81.7079		520.023	76.8822		520.025	84.5667		520.03	81.6295
521.026	36.7646		521.027	46.1928		521.022	50.4387		521.027	45.6219		521.029	81.6896		521.022	76.9099		521.025	84.6454		521.031	81.7095
522.026	36.7004		522.027	46.3658		522.023	50.4459		522.027	45.6801		522.03	81.6505		522.022	76.9095		522.025	84.634		522.031	81.6445
523.026	36.8592		523.027	46.3143		523.022	50.5072		523.027	45.6581		523.03	81.7219		523.023	76.9513		523.025	84.6311		523.031	81.6933
524.026	36.8639		524.027	46.4585		524.023	50.5504		524.027	45.7467		524.029	81.6951		524.022	76.9123		524.024	84.6524		524.03	81.638
525.027	36.9261		525.028	46.4141		525.023	50.5617		525.028	45.7363		525.03	81.699		525.022	76.969		525.025	84.6483		525.032	81.6776
526.027	36.9294		526.027	46.57		526.023	50.6506		526.028	45.8508		526.031	81.736		526.023	76.9599		526.025	84.6296		526.032	81.6491
527.026	37.0028		527.027	46.5153		527.023	50.6639		527.028	45.8725		527.03	81.6933		527.023	76.9674		527.025	84.6099		527.031	81.6355
528.027	37.0359		528.027	46.6553		528.023	50.7215		528.028	45.9275		528.031	81.709		528.023	76.9654		528.026	84.6696		528.032	81.6608
529.026	37.1549		529.028	46.5885		529.023	50.7933		529.028	45.947		529.03	81.7046		529.023	76.9651		529.025	84.6033		529.032	81.656
530.026	37.0895		530.028	46.7683		530.023	50.8326		530.027	46.0853		530.03	81.719		530.023	76.9018		530.025	84.6268		530.031	81.6503
531.026	37.2243		531.028	46.684		531.023	50.8358		531.027	46.0367		531.03	81.7057		531.023	76.9878		531.025	84.6614		531.031	81.6925
532.027	37.2005		532.028	46.7731		532.023	50.9025		532.028	46.1385		532.03	81.6908		532.023	76.9336		532.025	84.6388		532.032	81.6634
533.027	37.2365		533.028	46.8828		533.023	50.9339		533.028	46.1621		533.031	81.7397		533.023	76.9785		533.026	84.6591		533.032	81.6908
534.027	37.318		534.028	46.8474		534.023	50.9788		534.028	46.1956		534.031	81.7107		534.024	76.956		534.025	84.667		534.032	81.6908
535.027	37.3372		535.028	46.8193		535.023	50.9567		535.028	46.1513		535.031	81.7252		535.023	76.9537		535.025	84.6598		535.032	81.6578
536.027	37.3415		536.028	46.9376		536.023	51.0443		536.028	46.2747		536.03	81.6921		536.023	76.926		536.025	84.6521		536.031	81.6513
537.027	37.4194		537.028	46.8989		537.024	51.0557		537.028	46.2434		537.031	81.7308		537.024	76.9588		537.026	84.6644		537.032	81.6591
538.027	37.4509		538.028	46.9935		538.024	51.0568		538.028	46.2769		538.031	81.7149		538.024	76.9558		538.026	84.6439		538.032	81.6851
539.028	37.4952		539.028	47.0585		539.024	51.1557		539.029	46.3679		539.031	81.7395		539.024	76.9781		539.026	84.6533		539.033	81.6375
540.028	37.5665		540.029	47.0414		540.023	51.1683		540.029	46.4048		540.032	81.7476		540.024	76.9457		540.027	84.6161		540.033	81.6583
541.028	37.5896		541.029	47.0832		541.024	51.1978		541.029	46.4396		541.031	81.7439		541.024	76.9773		541.026	84.6051		541.032	81.6508
542.027	37.6163		542.029	47.2043		542.024	51.2972		542.028	46.5236		542.031	81.737		542.024	76.9807		542.026	84.6716		542.032	81.6899
543.028	37.7088		543.028	47.1593		543.023	51.3485		543.029	46.5597		543.032	81.741		543.024	77.018		543.027	84.6596		543.033	81.6949
544.028	37.7959		544.029	47.237		544.024	51.3518		544.029	46.5563		544.032	81.7197		544.024	76.9778		544.027	84.6574		544.033	81.7027
545.028	37.6068		545.028	47.3144		545.024	51.3415		545.029	46.6102		545.031	81.7383		545.024	76.9537		545.027	84.6348		545.033	81.6298
546.028	37.7747		546.029	47.2631		546.024	51.3818		546.029	46.5932		546.032	81.7194		546.024	76.947		546.027	84.5923		546.033	81.6105
547.028	37.8099		547.029	47.4006		547.024	51.466		547.029	46.7499		547.031	81.7		547.024	76.9569		547.027	84.6348		547.033	81.6375
548.029	37.8899		548.029	47.3029		548.024	51.4528		548.03	46.6768		548.032	81.7549		548.024	76.9771		548.027	84.6137		548.033	81.6297
549.028	37.9022		549.029	47.4412		549.024	51.527		549.029	46.7545		549.032	81.7171		549.024	76.9673		549.026	84.6668		549.033	81.6739
550.028	37.9219		550.029	47.4129		550.024	51.5033		550.03	46.7492		550.032	81.7107		550.025	76.9766		550.027	84.5945		550.033	81.5849
551.028	38.0723		551.029	47.5773		551.024	51.6378		551.029	46.9201		551.031	81.7245		551.024	76.9384		551.026	84.6133		551.032	81.6097
552.029	38.0463		552.029	47.4986		552.024	51.652		552.03	46.857		552.032	81.7038		552.025	77.012		552.027	84.6304		552.033	81.6569
553.028	38.1313		553.029	47.6654		553.024	51.7148		553.029	47.0017		553.031	81.6746		553.025	76.9578		553.027	84.6563		553.032	81.6753
554.028	38.2306		554.029	47.5594		554.024	51.7214		554.029	46.9663		554.031	81.7501		554.025	76.976		554.027	84.6584		554.032	81.6651
555.028	38.1226		555.029	47.7298		555.024	51.7744		555.029	47.0793		555.032	81.6921		555.025	76.9516		555.027	84.6102		555.033	81.6119
556.029	38.1821		556.029	47.6407		556.024	51.7624		556.03	47.0101		556.033	81.737		556.025	76.9849		556.028	84.6624		556.034	81.6455
557.029	38.2221		557.029	47.8092		557.024	51.8298		557.03	47.1471		557.032	81.618		557.024	76.9797		557.028	84.6249		557.033	81.6217
558.028	38.3001		558.029	47.7197		558.025	51.8265		558.03	47.1024		558.032	81.7177		558.025	76.9668		558.027	84.6239		558.034	81.596
559.028	38.3353		559.03	47.9088		559.025	51.9116		559.029	47.2232		559.031	81.6993		559.025	76.9361		559.027	84.6111		559.032	81.5641
560.028	38.3857		560.029	47.7954		560.024	51.9408		560.029	47.191		560.032	81.6823		560.025	76.9362		560.027	84.6352		560.033	81.6292
561.029	38.4409		561.029	47.884		561.025	51.9526		561.03	47.2338		561.032	81.6958		561.025	76.9533		561.028	84.6395		561.033	81.6609
562.029	38.4144		562.029	47.9099		562.024	51.9603		562.03	47.2708		562.032	81.7344		562.025	76.9851		562.028	84.6441		562.034	81.6011
563.029	38.5226		563.029	47.9442		563.024	52.0075		563.03	47.2639		563.032	81.7048		563.025	76.9387		563.028	84.6273		563.034	81.6079
564.029	38.5092		564.029	48.0055		564.024	52.0727		564.03	47.3494		564.033	81.7526		564.025	76.9766		564.028	84.593		564.034	81.5808
565.029	38.5827		565.03	48.004		565.025	52.0063		565.031	47.3269		565.033	81.6802		565.025	76.9917		565.028	84.659		565.034	81.6628
566.028	38.6499		566.03	48.0622		566.025	52.1457		566.029	47.4778		566.032	81.7451		566.025	76.9739		566.027	84.6368		566.033	81.6178
567.028	38.5948		567.03	48.0629		567.025	52.1505		567.029	47.4434		567.032	81.7445		567.025	76.9877		567.027	84.6135		567.033	81.6362
568.029	38.7646		568.03	48.1888		568.025	52.24		568.03	47.5954		568.033	81.7393		568.025	76.9722		568.027	84.6356		568.034	81.6096
569.028	38.6767		569.03	48.1074		569.025	52.1763		569.029	47.4553		569.031	81.7077		569.026	76.9672		569.027	84.5912		569.033	81.6306
570.029	38.8718		570.03	48.2407		570.025	52.3336		570.03	47.6385		570.032	81.7303		570.026	76.9786		570.028	84.618		570.033	81.6496
571.029	38.7906		571.03	48.3137		571.025	52.3007		571.03	47.6811		571.032	81.7575		571.026	76.9731		571.028	84.5648		571.033	81.5392
572.029	38.9378		572.031	48.3048		572.026	52.3494		572.03	47.639		572.033	81.7517		572.026	76.9955		572.028	84.6188		572.034	81.6275
573.029	38.8353		573.031	48.3826		573.026	52.3298		573.03	47.6399		573.033	81.7441		573.026	76.9134		573.028	84.6411		573.034	81.6449
574.03	38.9829		574.031	48.4051		574.025	52.434		574.031	47.772		574.033	81.7254		574.026	76.947		574.028	84.6427		574.034	81.6808
575.029	38.8799		575.03	48.2949		575.026	52.3671		575.03	47.6585		575.033	81.6677		575.026	77.0018		575.028	84.6687		575.034	81.6414
576.029	39.0615		576.031	48.5062		576.026	52.5261		576.03	47.8489		576.033	81.7334		576.026	76.9694		576.028	84.6683		576.034	81.6818
577.029	38.9863		577.031	48.4025		577.025	52.4423		577.03	47.7302		577.033	81.6819		577.026	76.9525		577.028	84.6014		577.034	81.5779
578.029	39.1128		578.03	48.482		578.026	52.5365		578.03	47.8703		578.033	81.7706		578.026	76.9491		578.028	84.6015		578.034	81.6088
579.029	39.0824		579.031	48.508		579.026	52.5326		579.03	47.8253		579.033	81.7137		579.026	76.965		579.028	84.631		579.034	81.6149
580.029	39.2283		580.03	48.6453		580.026	52.6118		580.031	47.9622		580.033	81.6797		580.027	76.9589		580.028	84.6502		580.035	81.6805
581.03	39.1351		581.03	48.5737		581.026	52.587		581.031	47.8754		581.033	81.6841		581.026	76.9773		581.029	84.6586		581.034	81.6653
582.03	39.3218		582.031	48.7445		582.026	52.6958		582.031	48.0513		582.033	81.7177		582.027	76.9422		582.028	84.5691		582.034	81.553
583.029	39.2282		583.031	48.6289		583.026	52.6212		583.031	47.894		583.033	81.7545		583.027	76.9574		583.028	84.6247		583.034	81.6151
584.03	39.3938		584.031	48.7876		584.026	52.7636		584.031	48.0773		584.034	81.7846		584.027	76.9392		584.029	84.631		584.035	81.6232
585.03	39.3421		585.03	48.6684		585.025	52.7115		585.031	47.9951		585.034	81.7336		585.027	77.0145		585.029	84.6087		585.035	81.6001
586.03	39.4285		586.03	48.8517		586.026	52.7854		586.032	48.1807		586.034	81.6979		586.027	76.9772		586.029	84.6347		586.035	81.6169
587.03	39.4477		587.031	48.7698		587.026	52.8002		587.032	48.1092		587.034	81.7217		587.027	76.9791		587.029	84.6214		587.035	81.6169
588.031	39.4654		588.031	48.8981		588.027	52.8468		588.032	48.2134		588.034	81.7356		588.027	77.0179		588.029	84.6597		588.035	81.6641
589.03	39.5634		589.03	48.9091		589.026	52.8913		589.032	48.2107		589.034	81.7074		589.027	76.9889		589.029	84.6506		589.035	81.6705
590.031	39.4819		590.03	48.881		590.026	52.8906		590.032	48.1923		590.034	81.7157		590.027	77.0214		590.029	84.6367		590.035	81.6216
591.03	39.6394		591.032	49.0221		591.027	52.9853		591.032	48.3548		591.034	81.6972		591.027	77.0019		591.029	84.6698		591.035	81.6468
592.031	39.5215		592.031	48.9918		592.027	52.932		592.032	48.2777		592.035	81.684		592.027	77.0295		592.029	84.6284		592.036	81.6031
593.031	39.7533		593.032	49.1023		593.027	53.0584		593.032	48.4259		593.034	81.7536		593.027	76.9809		593.03	84.6703		593.036	81.6584
594.031	39.6212		594.032	49.0457		594.027	52.9833		594.033	48.3251		594.034	81.6768		594.027	76.9637		594.03	84.6693		594.035	81.6661
595.031	39.7975		595.032	49.1899		595.026	53.0897		595.033	48.449		595.034	81.7185		595.027	76.971		595.03	84.6261		595.035	81.5922
596.031	39.7321		596.031	49.138		596.027	53.0855		596.032	48.437		596.034	81.7379		596.027	76.9795		596.03	84.6403		596.036	81.6141
597.031	39.9148		597.03	49.2962		597.026	53.197		597.032	48.5887		597.035	81.7036		597.027	76.9926		597.029	84.6376		597.036	81.6405
598.031	39.8092		598.032	49.1586		598.027	53.1279		598.032	48.4445		598.035	81.711		598.027	77.003		598.029	84.6323		598.036	81.6384
599.032	39.9459		599.032	49.2155		599.027	53.1851		599.033	48.5113		599.035	81.712		599.027	77.0191		599.03	84.6548		599.036	81.653
600.032	39.8698		600.032	49.268		600.027	53.2019		600.033	48.5455		600.035	81.7068		600.028	76.9595		600.03	84.6328		600.036	81.6238
601.031	40.0198		601.032	49.3662		601.027	53.2487		601.032	48.6645		601.034	81.7345		601.027	77.0134		601.03	84.6334		601.035	81.6359
602.031	39.9631		602.032	49.3429		602.027	53.2499		602.032	48.5927		602.034	81.7372		602.028	76.9912		602.03	84.6821		602.035	81.6312
603.031	40.1009		603.032	49.4747		603.028	53.3399		603.032	48.6985		603.034	81.7938		603.028	77.0125		603.03	84.6379		603.035	81.6257
604.031	40.0692		604.033	49.4302		604.028	53.3052		604.032	48.6733		604.035	81.7545		604.028	77.0206		604.03	84.6004		604.036	81.5641
605.031	40.1178		605.032	49.3817		605.028	53.3327		605.032	48.6827		605.034	81.7418		605.028	77.0058		605.03	84.6189		605.035	81.5877
606.031	40.1207		606.033	49.4673		606.028	53.3857		606.033	48.7782		606.035	81.7518		606.027	76.9938		606.03	84.6193		606.036	81.5898
607.031	40.2097		607.033	49.5466		607.027	53.4646		607.032	48.8131		607.034	81.7186		607.028	77.0153		607.03	84.6088		607.035	81.596
608.032	40.1849		608.033	49.5259		608.028	53.3812		608.033	48.795		608.036	81.7213		608.028	76.9925		608.031	84.6238		608.037	81.6119
609.031	40.2876		609.033	49.6569		609.028	53.5171		609.033	48.9287		609.035	81.7353		609.028	77.0292		609.03	84.6518		609.036	81.6387
610.032	40.303		610.032	49.5608		610.028	53.5298		610.033	48.8896		610.035	81.7619		610.028	76.9738		610.031	84.6329		610.036	81.5906
611.031	40.2857		611.033	49.7045		611.028	53.551		611.032	48.9429		611.034	81.712		611.028	77.004		611.03	84.6102		611.036	81.5561
612.032	40.4056		612.032	49.6441		612.027	53.5575		612.033	48.9468		612.035	81.7054		612.028	76.9564		612.03	84.6107		612.037	81.6052
613.031	40.3921		613.032	49.7657		613.028	53.6205		613.032	49.0027		613.034	81.7589		613.028	77.0048		613.03	84.6388		613.035	81.6371
614.032	40.5154		614.033	49.7776		614.028	53.689		614.033	49.0635		614.035	81.7258		614.028	77.0199		614.031	84.6471		614.036	81.6243
615.032	40.394		615.033	49.759		615.028	53.5977		615.033	48.9745		615.035	81.7378		615.028	77.0372		615.031	84.6429		615.036	81.6214
616.033	40.4453		616.033	49.8994		616.028	53.6955		616.034	49.1051		616.036	81.7519		616.028	76.9386		616.031	84.6261		616.037	81.6156
617.031	40.5478		617.033	49.77		617.028	53.6966		617.032	49.0981		617.035	81.6572		617.028	76.9868		617.03	84.6066		617.036	81.5534
618.031	40.5569		618.033	49.9501		618.028	53.7411		618.032	49.1406		618.034	81.7324		618.029	76.9442		618.03	84.5916		618.035	81.5466
619.032	40.6459		619.033	49.8569		619.028	53.7778		619.034	49.1769		619.036	81.7478		619.029	76.9362		619.031	84.5754		619.037	81.564
620.032	40.6375		620.033	50.0248		620.028	53.8177		620.033	49.2449		620.035	81.7223		620.029	77.006		620.031	84.5822		620.036	81.5424
621.033	40.6834		621.033	49.9396		621.028	53.7778		621.034	49.2349		621.037	81.7292		621.029	77.0292		621.032	84.6187		621.038	81.5835
622.032	40.7732		622.033	50.0735		622.029	53.8749		622.034	49.2923		622.036	81.7266		622.029	76.9917		622.031	84.6277		622.038	81.615
623.033	40.6992		623.033	50.0405		623.028	53.8533		623.034	49.2495		623.036	81.704		623.028	76.9412		623.031	84.5879		623.038	81.5224
624.032	40.8841		624.033	50.1618		624.029	53.9428		624.033	49.3656		624.036	81.7203		624.029	77.031		624.031	84.6487		624.037	81.6248
625.033	40.7796		625.033	50.1005		625.028	53.9211		625.034	49.3723		625.036	81.7535		625.029	76.9722		625.032	84.6062		625.037	81.5586
626.033	40.9464		626.033	50.2359		626.029	54.0133		626.034	49.441		626.036	81.8011		626.029	76.9744		626.032	84.5752		626.038	81.5554
627.032	40.8327		627.033	50.106		627.028	53.9534		627.034	49.4255		627.036	81.7317		627.029	76.9965		627.031	84.6186		627.038	81.5935
628.033	40.9866		628.034	50.2864		628.029	54.0915		628.034	49.5091		628.037	81.771		628.029	76.9318		628.032	84.6362		628.038	81.6196
629.033	40.9666		629.034	50.2008		629.029	54.0448		629.034	49.5052		629.037	81.7484		629.029	76.9605		629.032	84.6062		629.038	81.5204
630.033	41.0017		630.034	50.3128		630.029	54.0815		630.035	49.5204		630.037	81.7635		630.029	77.0081		630.032	84.611		630.038	81.529
631.033	41.0871		631.033	50.2567		631.029	54.1132		631.034	49.5751		631.037	81.7445		631.029	77.0055		631.032	84.6409		631.038	81.6013
632.034	41.0992		632.034	50.4204		632.029	54.1674		632.035	49.6306		632.037	81.7325		632.029	76.9966		632.032	84.6689		632.038	81.611
633.034	41.1232		633.034	50.3053		633.029	54.1473		633.035	49.6183		633.037	81.7379		633.029	76.9437		633.032	84.6017		633.038	81.5563
634.033	41.1547		634.034	50.5234		634.029	54.2159		634.034	49.6594		634.037	81.7164		634.029	76.9687		634.032	84.5613		634.038	81.5664
635.033	41.1962		635.034	50.4142		635.029	54.2121		635.034	49.6589		635.037	81.7589		635.029	77.0233		635.032	84.6112		635.038	81.5966
636.033	41.2849		636.034	50.5435		636.029	54.2722		636.034	49.8189		636.037	81.7445		636.029	76.9889		636.032	84.6093		636.038	81.6269
637.034	41.2076		637.034	50.4294		637.029	54.2104		637.035	49.7197		637.037	81.7143		637.03	77.0092		637.032	84.602		637.038	81.4991
638.033	41.3566		638.034	50.5961		638.029	54.3439		638.034	49.8328		638.037	81.8334		638.03	77.0225		638.032	84.6172		638.038	81.5971
639.033	41.2584		639.034	50.5905		639.029	54.2976		639.035	49.8044		639.037	81.7635		639.03	76.9602		639.032	84.6049		639.038	81.5542
640.033	41.3944		640.033	50.6389		640.029	54.3682		640.034	49.8559		640.037	81.7583		640.029	76.9858		640.032	84.6369		640.038	81.5861
641.033	41.5097		641.034	50.6844		641.029	54.4151		641.035	49.9673		641.037	81.753		641.03	77.0027		641.032	84.6388		641.038	81.5986
642.033	41.3737		642.034	50.6779		642.03	54.3617		642.034	49.9418		642.037	81.7648		642.03	77.0028		642.032	84.6373		642.038	81.5907
643.033	41.4461		643.033	50.7266		643.029	54.4585		643.035	49.9485		643.037	81.7749		643.03	76.9298		643.032	84.6537		643.038	81.5805
644.034	41.4219		644.034	50.6672		644.029	54.4258		644.035	49.9853		644.037	81.7281		644.029	77.0042		644.033	84.5703		644.038	81.5662
645.034	41.5851		645.034	50.8088		645.03	54.54		645.034	50.0447		645.037	81.7552		645.029	77.0514		645.032	84.6518		645.038	81.6441
646.034	41.4887		646.034	50.7236		646.03	54.4673		646.035	50.0061		646.037	81.7049		646.03	76.9917		646.033	84.6143		646.038	81.5913
647.033	41.6709		647.034	50.8639		647.03	54.6138		647.034	50.1599		647.037	81.8055		647.029	77.0128		647.032	84.5806		647.038	81.5816
648.034	41.5555		648.034	50.8596		648.03	54.5211		648.035	50.1228		648.038	81.7712		648.03	76.9991		648.032	84.6039		648.039	81.5621
649.034	41.7523		649.034	50.8714		649.03	54.6533		649.035	50.2366		649.038	81.7366		649.03	77.0328		649.034	84.6208		649.039	81.6039
650.034	41.6565		650.034	50.8531		650.029	54.5956		650.035	50.2128		650.038	81.7826		650.03	77.0033		650.033	84.5808		650.039	81.5312
651.034	41.7626		651.035	51.0297		651.03	54.6625		651.035	50.2536		651.038	81.7556		651.03	76.9853		651.033	84.5895		651.039	81.5772
652.035	41.774		652.034	50.9198		652.029	54.647		652.036	50.2455		652.038	81.7225		652.03	77.0268		652.033	84.5954		652.039	81.5371
653.034	41.7961		653.035	51.0629		653.03	54.7536		653.035	50.3017		653.038	81.7384		653.03	77.0377		653.033	84.6671		653.039	81.6326
654.034	41.8092		654.034	51.0375		654.03	54.7228		654.035	50.3258		654.038	81.7435		654.03	77.0064		654.033	84.5921		654.039	81.5088
655.035	41.8686		655.034	51.1063		655.03	54.778		655.036	50.3745		655.038	81.7044		655.03	77.0427		655.034	84.6401		655.04	81.5893
656.034	41.8434		656.035	51.0661		656.031	54.7202		656.036	50.3988		656.038	81.7166		656.03	77.0225		656.034	84.6719		656.039	81.6208
657.035	42.0288		657.035	51.2155		657.031	54.8447		657.036	50.4633		657.038	81.7463		657.031	77.0193		657.034	84.6151		657.039	81.5673
658.035	41.887		658.036	51.0768		658.03	54.8119		658.036	50.4315		658.039	81.7729		658.03	76.9967		658.034	84.6245		658.04	81.6162
659.034	42.0837		659.036	51.2521		659.031	54.9		659.036	50.5744		659.038	81.7268		659.03	77.0403		659.034	84.6558		659.04	81.6212
660.035	41.9368		660.035	51.1344		660.03	54.8565		660.036	50.4399		660.038	81.7102		660.03	77.0339		660.034	84.6045		660.04	81.528
661.035	42.155		661.035	51.3369		661.03	54.9707		661.036	50.6344		661.038	81.768		661.03	77.0139		661.034	84.6576		661.04	81.6501
662.035	41.999		662.036	51.2142		662.031	54.9098		662.036	50.5329		662.038	81.7752		662.031	76.9827		662.034	84.5964		662.04	81.548
663.035	42.2194		663.036	51.3507		663.031	55.0509		663.037	50.7214		663.039	81.7515		663.031	77.0182		663.034	84.6745		663.04	81.6043
664.034	42.2571		664.036	51.3178		664.031	55.0113		664.035	50.6295		664.038	81.8047		664.03	77.0968		664.033	84.6315		664.039	81.6054
665.035	42.0739		665.036	51.3818		665.031	54.9769		665.036	50.6165		665.038	81.7862		665.032	77.0008		665.034	84.6479		665.039	81.6085
666.035	42.167		666.036	51.4064		666.031	55.0256		666.037	50.7054		666.038	81.7666		666.032	77.0309		666.034	84.626		666.039	81.5443
667.035	42.2421		667.036	51.3928		667.031	55.0324		667.036	50.693		667.038	81.7625		667.031	77.0359		667.034	84.6304		667.039	81.5927
668.035	42.3314		668.036	51.4809		668.031	55.1213		668.037	50.7931		668.039	81.7898		668.031	77.0885		668.034	84.6642		668.04	81.63
669.035	42.2444		669.036	51.4293		669.031	55.0619		669.036	50.7025		669.039	81.742		669.032	76.9735		669.034	84.6106		669.04	81.6054
670.036	42.3744		670.037	51.5797		670.031	55.1606		670.037	50.8278		670.039	81.776		670.031	77.0213		670.034	84.5636		670.04	81.528
671.035	42.3465		671.036	51.5639		671.031	55.1699		671.037	50.7846		671.039	81.7899		671.031	77.0191		671.034	84.5969		671.04	81.525
672.036	42.3922		672.036	51.6595		672.031	55.2131		672.037	50.8882		672.039	81.7673		672.032	76.9589		672.034	84.6625		672.04	81.5849
673.035	42.4314		673.036	51.5457		673.031	55.1929		673.037	50.8808		673.039	81.73		673.032	77.0679		673.034	84.5923		673.04	81.5462
674.036	42.4156		674.037	51.6271		674.032	55.197		674.037	50.9074		674.039	81.7849		674.032	77.0015		674.034	84.6231		674.04	81.5921
675.035	42.5267		675.037	51.7357		675.032	55.2701		675.037	50.9637		675.039	81.7739		675.032	77.0102		675.034	84.6286		675.041	81.5736
676.036	42.5407		676.037	51.713		676.032	55.308		676.037	50.9921		676.039	81.7867		676.032	77.0456		676.035	84.6991		676.04	81.6511
677.035	42.5065		677.037	51.7048		677.032	55.3358		677.037	51.0752		677.039	81.7588		677.032	77.025		677.034	84.5604		677.041	81.554
678.036	42.5837		678.037	51.7098		678.031	55.3142		678.037	51.0348		678.04	81.7685		678.032	77.0663		678.034	84.5947		678.041	81.5443
679.035	42.5801		679.036	51.7757		679.032	55.3247		679.037	51.0683		679.039	81.7729		679.032	77		679.034	84.6556		679.041	81.5812
680.035	42.6469		680.036	51.7173		680.031	55.381		680.037	51.0405		680.039	81.8142		680.032	77.023		680.034	84.6649		680.04	81.5788
681.035	42.6497		681.037	51.7906		681.032	55.3939		681.037	51.1037		681.039	81.7657		681.032	77.0013		681.034	84.5958		681.041	81.5768
682.036	42.7277		682.037	51.7808		682.032	55.4369		682.038	51.1369		682.04	81.7949		682.033	77.0431		682.035	84.632		682.041	81.5684
683.036	42.6983		683.036	51.8929		683.032	55.4532		683.037	51.1683		683.039	81.7508		683.033	77.0186		683.035	84.6043		683.041	81.5673
684.036	42.7859		684.037	51.7973		684.032	55.4727		684.038	51.1588		684.04	81.7367		684.032	77.0167		684.035	84.6194		684.041	81.5754
685.036	42.7655		685.037	52.0359		685.032	55.5109		685.037	51.2476		685.04	81.7867		685.032	77.0215		685.035	84.6272		685.041	81.5683
686.036	42.8304		686.037	51.8921		686.032	55.4959		686.038	51.181		686.04	81.7549		686.033	77.006		686.035	84.589		686.041	81.5236
687.036	42.8685		687.037	52.0702		687.032	55.5826		687.037	51.2907		687.039	81.7568		687.032	77.0132		687.035	84.5951		687.04	81.5953
688.036	42.8364		688.037	51.9508		688.032	55.5114		688.038	51.2293		688.04	81.7574		688.033	77.0068		688.035	84.5826		688.041	81.5475
689.036	42.9569		689.037	52.0782		689.032	55.5709		689.037	51.3365		689.039	81.7613		689.033	77.0372		689.035	84.6375		689.041	81.5617
690.036	42.9085		690.038	51.9623		690.033	55.569		690.037	51.2759		690.039	81.7242		690.033	77.0172		690.035	84.5998		690.041	81.5538
691.036	42.9977		691.037	52.1643		691.032	55.6778		691.037	51.4412		691.039	81.7355		691.033	77.0371		691.035	84.5964		691.041	81.5349
692.037	42.9581		692.038	52.1888		692.033	55.6673		692.038	51.4022		692.04	81.7256		692.033	77.0147		692.035	84.6018		692.041	81.5415
693.036	43.0251		693.037	52.0727		693.032	55.6648		693.037	51.3779		693.039	81.7139		693.033	77.0026		693.035	84.6028		693.04	81.5007
694.036	43.0361		694.037	52.1608		694.033	55.6683		694.037	51.3663		694.04	81.7123		694.033	77.0231		694.035	84.586		694.041	81.5301
695.036	43.1269		695.038	52.1848		695.033	55.6938		695.037	51.4305		695.039	81.7446		695.033	77.034		695.035	84.652		695.04	81.5752
696.037	43.1211		696.038	52.2839		696.033	55.757		696.038	51.4939		696.04	81.7399		696.033	77.006		696.035	84.5738		696.041	81.5534
697.036	43.1136		697.038	52.2433		697.033	55.7169		697.038	51.4766		697.04	81.6867		697.033	77.0457		697.035	84.6388		697.041	81.5829
698.037	43.2105		698.038	52.3686		698.033	55.7898		698.038	51.5641		698.041	81.7892		698.033	77.0433		698.036	84.6149		698.042	81.5667
699.036	43.2075		699.038	52.3462		699.033	55.7951		699.038	51.5304		699.04	81.804		699.033	77.0507		699.035	84.6303		699.041	81.5774
700.036	43.2583		700.038	52.3048		700.033	55.8696		700.038	51.6771		700.04	81.7957		700.033	77.0435		700.035	84.6603		700.041	81.5778
701.037	43.2874		701.038	52.4218		701.033	55.8632		701.038	51.6555		701.04	81.74		701.033	77.0111		701.036	84.5569		701.042	81.49
702.037	43.2586		702.038	52.3548		702.033	55.8552		702.038	51.6334		702.041	81.7769		702.033	77.0609		702.036	84.5943		702.042	81.5525
703.038	43.2905		703.038	52.4844		703.033	55.8902		703.039	51.6797		703.041	81.7549		703.033	77.0004		703.036	84.5394		703.042	81.5011
704.038	43.378		704.037	52.38		704.033	55.922		704.039	51.7173		704.041	81.7749		704.033	77.0283		704.037	84.5374		704.043	81.5122
705.038	43.3512		705.038	52.5341		705.033	55.9493		705.039	51.7169		705.041	81.7535		705.034	77.0229		705.036	84.6264		705.043	81.5797
706.038	43.4512		706.037	52.534		706.033	55.9706		706.039	51.759		706.041	81.8163		706.034	77.0535		706.036	84.5959		706.043	81.5578
707.038	43.4383		707.037	52.6296		707.033	56.0239		707.039	51.826		707.041	81.7722		707.033	77.029		707.037	84.5947		707.043	81.5511
708.038	43.4935		708.038	52.4965		708.033	55.9798		708.038	51.7593		708.041	81.7932		708.034	77.0161		708.037	84.6267		708.042	81.5468
709.038	43.509		709.038	52.6024		709.033	56.0619		709.039	51.8877		709.042	81.7444		709.033	77.0433		709.037	84.5631		709.043	81.5293
710.037	43.4643		710.038	52.5733		710.033	56.0013		710.038	51.764		710.041	81.8208		710.033	77.0331		710.036	84.6172		710.042	81.581
711.038	43.6155		711.038	52.736		711.034	56.1475		711.039	51.9247		711.041	81.7754		711.034	76.9928		711.037	84.5755		711.043	81.562
712.038	43.5402		712.037	52.6123		712.033	56.0919		712.039	51.8661		712.041	81.7764		712.034	77.0288		712.036	84.5275		712.043	81.5046
713.038	43.6698		713.038	52.7427		713.033	56.1524		713.039	51.9769		713.042	81.7766		713.034	77.0137		713.037	84.6496		713.043	81.5454
714.038	43.6159		714.038	52.6821		714.033	56.1502		714.039	51.9331		714.041	81.7973		714.034	77.0364		714.037	84.5829		714.043	81.5474
715.038	43.6719		715.038	52.7785		715.033	56.1723		715.039	52.0117		715.041	81.7494		715.034	77.0274		715.036	84.6222		715.043	81.5841
716.038	43.7071		716.038	52.6936		716.033	56.21		716.039	51.9747		716.041	81.7842		716.034	77.0379		716.037	84.5819		716.043	81.4836
717.038	43.6818		717.038	52.8629		717.034	56.207		717.039	52.0431		717.042	81.7585		717.034	77.0373		717.037	84.5942		717.043	81.5235
718.038	43.7898		718.038	52.7984		718.033	56.2164		718.039	52.0518		718.041	81.8017		718.034	77.0884		718.037	84.5848		718.043	81.5231
719.038	43.7238		719.038	52.9084		719.034	56.242		719.039	52.1109		719.041	81.8091		719.035	77.0158		719.037	84.5735		719.043	81.5132
720.039	43.8375		720.038	52.9228		720.034	56.3084		720.04	52.1579		720.042	81.7713		720.034	77.0221		720.037	84.6218		720.043	81.5694
721.038	43.7723		721.038	52.8783		721.033	56.2551		721.039	52.092		721.041	81.7815		721.034	77.0463		721.037	84.5342		721.043	81.499
722.038	43.8744		722.038	52.9691		722.034	56.3636		722.039	52.2242		722.041	81.738		722.035	77.0131		722.037	84.6313		722.042	81.5906
723.038	43.8435		723.039	52.9482		723.034	56.3773		723.04	52.2591		723.042	81.7637		723.034	77.0909		723.038	84.6192		723.043	81.535
724.039	43.9533		724.038	52.9367		724.034	56.4052		724.04	52.2791		724.042	81.731		724.035	77.0365		724.038	84.6353		724.043	81.5476
725.038	43.8903		725.039	52.9819		725.034	56.4062		725.04	52.2338		725.042	81.7386		725.035	77.0384		725.037	84.5825		725.044	81.5519
726.039	44.0339		726.039	52.9978		726.034	56.4458		726.04	52.3011		726.042	81.7605		726.035	76.9874		726.038	84.5849		726.043	81.5531
727.038	43.9897		727.039	53.0723		727.034	56.448		727.039	52.2935		727.042	81.7704		727.035	77.0486		727.037	84.5675		727.043	81.5236
728.038	44.0518		728.039	53.0577		728.034	56.4599		728.039	52.3373		728.042	81.7999		728.035	77.045		728.037	84.6096		728.043	81.5474
729.039	44.1014		729.039	53.1735		729.034	56.5262		729.04	52.4294		729.043	81.7834		729.035	77.0349		729.038	84.5827		729.043	81.5132
730.039	44.0652		730.039	53.0664		730.034	56.4946		730.04	52.3676		730.042	81.8033		730.035	77.0426		730.038	84.6355		730.043	81.5569
731.039	44.1607		731.039	53.1833		731.035	56.5771		731.041	52.4422		731.043	81.7614		731.035	77.0348		731.038	84.6173		731.044	81.5752
732.039	44.1286		732.039	53.2186		732.035	56.5536		732.04	52.4357		732.043	81.8041		732.035	77.0586		732.038	84.5891		732.044	81.5102
733.039	44.1821		733.04	53.1455		733.035	56.6112		733.04	52.4717		733.042	81.785		733.035	76.9787		733.038	84.5871		733.043	81.5649
734.038	44.2072		734.039	53.2453		734.034	56.6378		734.039	52.4883		734.042	81.8115		734.036	77.0508		734.037	84.5577		734.043	81.4835
735.039	44.2417		735.04	53.2441		735.035	56.6181		735.04	52.5075		735.042	81.7582		735.035	77.0604		735.038	84.5801		735.043	81.5636
736.038	44.2689		736.04	53.2953		736.035	56.6715		736.039	52.5435		736.042	81.7618		736.035	77.0731		736.038	84.6449		736.043	81.6019
737.039	44.1925		737.04	53.271		737.035	56.6317		737.04	52.4902		737.042	81.7626		737.036	77.0233		737.038	84.5717		737.043	81.5343
738.039	44.2865		738.04	53.3182		738.035	56.7098		738.04	52.5928		738.042	81.7899		738.036	77.0201		738.038	84.6353		738.043	81.5907
739.038	44.2782		739.041	53.3197		739.035	56.6315		739.039	52.5182		739.042	81.7463		739.036	77.0612		739.037	84.577		739.043	81.5532
740.039	44.367		740.04	53.4538		740.035	56.742		740.04	52.6431		740.043	81.7911		740.035	77.0394		740.038	84.6088		740.044	81.5484
741.039	44.3238		741.04	53.4269		741.035	56.7483		741.04	52.6218		741.042	81.7821		741.036	76.994		741.038	84.5685		741.043	81.4902
742.039	44.4053		742.04	53.4307		742.035	56.7464		742.04	52.6495		742.043	81.8095		742.036	77.048		742.038	84.6187		742.044	81.5468
743.039	44.44		743.04	53.4722		743.035	56.8121		743.041	52.7397		743.043	81.7442		743.035	77.0175		743.038	84.6037		743.044	81.5183
744.039	44.4145		744.04	53.3716		744.035	56.7569		744.04	52.6702		744.043	81.7353		744.036	77.0373		744.038	84.5622		744.044	81.5129
745.039	44.4799		745.04	53.5152		745.035	56.8672		745.04	52.7654		745.042	81.7731		745.036	77.0304		745.038	84.6256		745.043	81.5465
746.04	44.5184		746.04	53.4877		746.036	56.8202		746.041	52.7148		746.043	81.7628		746.035	77.0483		746.039	84.6028		746.045	81.5369
747.04	44.5639		747.04	53.5679		747.036	56.8366		747.041	52.785		747.043	81.8063		747.036	77.048		747.039	84.6204		747.045	81.5399
748.04	44.5571		748.04	53.6204		748.035	56.914		748.041	52.8075		748.043	81.842		748.037	77.053		748.039	84.5708		748.045	81.5256
749.039	44.6227		749.041	53.5523		749.036	56.8775		749.04	52.8406		749.043	81.7644		749.036	77.0672		749.038	84.6396		749.044	81.5535
750.04	44.5705		750.04	53.6343		750.036	56.8481		750.041	52.8007		750.043	81.789		750.036	77.0263		750.039	84.5605		750.045	81.4947
751.04	44.6556		751.041	53.6059		751.036	56.9101		751.041	52.8621		751.043	81.7557		751.037	77.0625		751.038	84.6072		751.045	81.551
752.04	44.6737		752.04	53.6884		752.036	56.964		752.041	52.9352		752.044	81.8034		752.037	77.0361		752.038	84.5869		752.045	81.5356
753.04	44.7184		753.04	53.6788		753.036	56.9941		753.041	52.9115		753.043	81.8401		753.037	77.0898		753.038	84.6269		753.045	81.5419
754.039	44.7027		754.041	53.749		754.036	57		754.041	52.9274		754.043	81.7312		754.037	77.0124		754.038	84.609		754.045	81.523
755.04	44.7693		755.04	53.7105		755.036	57.0313		755.041	52.9605		755.044	81.7177		755.037	77.0274		755.039	84.5917		755.045	81.5242
756.041	44.7746		756.04	53.821		756.036	57.0788		756.042	53.0131		756.044	81.752		756.037	77.0404		756.039	84.583		756.045	81.5068
757.04	44.8167		757.041	53.7482		757.036	57.0773		757.041	53.0543		757.044	81.801		757.037	77.0467		757.039	84.5823		757.045	81.495
758.04	44.7912		758.04	53.8317		758.036	57.093		758.041	53.0384		758.044	81.7739		758.037	77.0305		758.039	84.5623		758.045	81.4875
759.04	44.8568		759.041	53.8399		759.036	57.1116		759.042	53.111		759.044	81.8012		759.037	77.0682		759.039	84.6321		759.045	81.5797
760.041	44.849		760.041	53.8006		760.036	57.1094		760.042	53.07		760.045	81.7467		760.037	77.0233		760.04	84.6403		760.046	81.5988
761.041	44.9477		761.041	53.957		761.037	57.1841		761.042	53.1302		761.045	81.7801		761.037	77.0548		761.04	84.6638		761.046	81.5909
762.041	44.9139		762.041	53.8319		762.036	57.1482		762.042	53.125		762.045	81.7367		762.037	77.0644		762.04	84.5798		762.046	81.4875
763.041	44.9532		763.041	53.9811		763.037	57.2022		763.043	53.1573		763.045	81.7939		763.037	77.0823		763.04	84.6484		763.046	81.5523
764.041	44.9967		764.041	53.8878		764.037	57.1829		764.042	53.1195		764.045	81.8083		764.037	77.0392		764.039	84.5761		764.046	81.5326
765.041	45.0673		765.042	54.057		765.036	57.3053		765.042	53.2817		765.045	81.7964		765.037	77.0798		765.04	84.655		765.046	81.5985
766.042	44.9959		766.042	53.9197		766.037	57.2163		766.043	53.19		766.045	81.7752		766.037	77.059		766.04	84.5885		766.046	81.571
767.041	45.0903		767.041	54.068		767.037	57.2931		767.042	53.2568		767.045	81.7928		767.037	77.0282		767.039	84.6401		767.046	81.6073
768.041	45.0672		768.042	54.0436		768.037	57.2992		768.043	53.2688		768.045	81.8047		768.037	77.066		768.04	84.5628		768.047	81.5189
769.041	45.0769		769.042	54.0429		769.037	57.2992		769.043	53.2462		769.045	81.7575		769.038	77.0466		769.04	84.652		769.046	81.5524
770.041	45.1641		770.041	54.1049		770.036	57.3279		770.043	53.2912		770.045	81.8825		770.037	77.0335		770.04	84.605		770.046	81.5518
771.041	45.1459		771.042	54.0889		771.037	57.3746		771.042	53.3231		771.045	81.7997		771.038	77.0734		771.04	84.622		771.046	81.5261
772.042	45.184		772.042	54.191		772.037	57.3813		772.043	53.4013		772.046	81.7976		772.037	77.0715		772.04	84.648		772.047	81.5746
773.041	45.2159		773.041	54.1556		773.037	57.3874		773.042	53.3462		773.045	81.7918		773.038	77.095		773.04	84.6427		773.046	81.5734
774.042	45.2119		774.041	54.2478		774.037	57.404		774.043	53.3868		774.045	81.84		774.038	77.0933		774.041	84.6212		774.046	81.5699
775.041	45.2985		775.042	54.203		775.037	57.437		775.043	53.4453		775.045	81.7821		775.038	77.0683		775.04	84.5832		775.046	81.5159
776.042	45.2848		776.042	54.2517		776.037	57.4639		776.043	53.4519		776.045	81.7998		776.038	77.058		776.04	84.6353		776.047	81.5724
777.042	45.3002		777.042	54.239		777.037	57.4322		777.043	53.448		777.045	81.8372		777.038	77.0665		777.041	84.5909		777.047	81.5372
778.042	45.3772		778.042	54.3027		778.038	57.5344		778.043	53.5254		778.046	81.8193		778.038	77.0569		778.041	84.6302		778.047	81.545
779.042	45.3237		779.041	54.2548		779.037	57.47		779.043	53.4823		779.045	81.8404		779.037	77.0591		779.041	84.6414		779.047	81.5685
780.042	45.4359		780.042	54.3664		780.037	57.5897		780.043	53.6093		780.046	81.8287		780.037	77.0977		780.041	84.6571		780.047	81.6133
781.042	45.3996		781.042	54.332		781.038	57.5329		781.043	53.556		781.046	81.804		781.038	77.1029		781.041	84.611		781.047	81.5751
782.042	45.4947		782.042	54.3562		782.038	57.6073		782.044	53.6287		782.046	81.7491		782.038	77.0817		782.041	84.6868		782.047	81.6299
783.042	45.4352		783.042	54.34		783.037	57.5794		783.043	53.5834		783.046	81.7876		783.038	77.0333		783.041	84.5892		783.047	81.5062
784.042	45.506		784.043	54.3149		784.038	57.6472		784.043	53.6027		784.046	81.8174		784.038	77.1023		784.041	84.5996		784.047	81.5533
785.042	45.5167		785.043	54.479		785.038	57.6397		785.043	53.6562		785.045	81.8193		785.038	77.0981		785.041	84.6089		785.047	81.5455
786.043	45.5284		786.043	54.4233		786.038	57.6745		786.044	53.7103		786.046	81.8175		786.038	77.132		786.041	84.6443		786.048	81.5829
787.042	45.55		787.043	54.4947		787.038	57.678		787.044	53.7044		787.046	81.7867		787.038	77.0675		787.041	84.6465		787.047	81.5733
788.043	45.6809		788.043	54.5641		788.038	57.7446		788.044	53.7862		788.046	81.7858		788.038	77.0806		788.041	84.6242		788.047	81.5802
789.042	45.6297		789.043	54.4479		789.038	57.6686		789.044	53.6623		789.046	81.7858		789.038	77.0834		789.041	84.6893		789.047	81.6705
790.043	45.6671		790.043	54.6142		790.038	57.782		790.044	53.8261		790.047	81.8301		790.038	77.0997		790.041	84.6168		790.048	81.587
791.043	45.649		791.043	54.5071		791.038	57.7259		791.044	53.754		791.046	81.8166		791.038	77.1004		791.041	84.6508		791.048	81.5749
792.042	45.6522		792.043	54.6092		792.038	57.7766		792.043	53.8239		792.046	81.8701		792.039	77.1256		792.041	84.5948		792.047	81.5633
793.043	45.7117		793.043	54.5938		793.038	57.7961		793.044	53.843		793.047	81.8221		793.039	77.0641		793.041	84.5879		793.048	81.5445
794.042	45.7161		794.044	54.6688		794.038	57.828		794.044	53.8824		794.046	81.7923		794.039	77.1158		794.041	84.5875		794.047	81.4882
795.043	45.7945		795.043	54.5683		795.039	57.8303		795.044	53.8998		795.046	81.8352		795.038	77.1336		795.042	84.6267		795.048	81.5675
796.043	45.813		796.043	54.7485		796.039	57.9175		796.044	53.962		796.047	81.8359		796.039	77.0787		796.042	84.6831		796.048	81.6237
797.042	45.8049		797.043	54.6419		797.038	57.8593		797.043	53.9235		797.046	81.7793		797.038	77.1063		797.041	84.6572		797.048	81.6138
798.043	45.8653		798.044	54.7188		798.038	57.9131		798.045	53.9591		798.047	81.822		798.039	77.146		798.042	84.6343		798.048	81.5851
799.043	45.8269		799.044	54.7137		799.039	57.9437		799.045	53.9643		799.047	81.8119		799.039	77.0925		799.042	84.6847		799.048	81.5927
800.043	45.9371		800.044	54.8106		800.039	58.0025		800.044	54.069		800.046	81.876		800.039	77.166		800.041	84.6528		800.048	81.6193
801.043	45.8822		801.044	54.8208		801.039	57.9653		801.044	54.0234		801.047	81.878		801.039	77.1018		801.042	84.6458		801.048	81.5591
802.043	46.0038		802.044	54.8227		802.039	57.9877		802.044	54.093		802.046	81.8325		802.039	77.1077		802.042	84.6386		802.048	81.6408
803.043	45.9213		803.044	54.8162		803.039	57.9587		803.044	54.0395		803.047	81.8014		803.039	77.1443		803.042	84.6463		803.048	81.5701
804.043	46.0484		804.044	54.8878		804.039	58.0466		804.045	54.1033		804.047	81.8352		804.039	77.1354		804.042	84.6091		804.048	81.5742
805.043	45.9676		805.043	54.8411		805.039	57.9944		805.044	54.0149		805.047	81.841		805.04	77.1312		805.041	84.6282		805.048	81.5673
806.044	46.0339		806.044	54.9185		806.039	58.0577		806.045	54.1564		806.048	81.8204		806.039	77.0409		806.043	84.6163		806.048	81.6341
807.043	46.0451		807.044	54.9094		807.039	58.0492		807.044	54.1336		807.047	81.8448		807.039	77.111		807.042	84.6416		807.048	81.5897
808.043	46.069		808.044	54.9785		808.039	58.0622		808.044	54.1589		808.047	81.8561		808.04	77.1017		808.042	84.6218		808.048	81.551
809.044	46.1269		809.045	54.9089		809.04	58.096		809.045	54.2047		809.048	81.8893		809.04	77.1407		809.043	84.6265		809.049	81.5785
810.044	46.0574		810.044	54.949		810.039	58.071		810.045	54.2063		810.048	81.8267		810.04	77.1263		810.043	84.6125		810.049	81.5797
811.044	46.1948		811.043	55.1041		811.039	58.2031		811.045	54.2691		811.048	81.8164		811.04	77.127		811.043	84.6054		811.049	81.587
812.044	46.1374		812.044	55.0551		812.04	58.1186		812.045	54.1995		812.047	81.8624		812.039	77.0945		812.043	84.6304		812.048	81.6105
813.044	46.2507		813.044	55.0584		813.04	58.2114		813.045	54.3265		813.047	81.8271		813.04	77.129		813.043	84.6621		813.049	81.6299
814.044	46.2175		814.043	55.0953		814.039	58.2044		814.045	54.3039		814.047	81.8487		814.04	77.1287		814.043	84.639		814.048	81.5707
815.044	46.2862		815.044	55.0848		815.04	58.2524		815.045	54.3627		815.048	81.8964		815.04	77.1429		815.042	84.6609		815.049	81.6447
816.043	46.2242		816.045	55.1177		816.04	58.2401		816.045	54.3327		816.047	81.8597		816.04	77.1419		816.042	84.6309		816.049	81.576
817.044	46.2494		817.045	55.0646		817.04	58.227		817.045	54.3012		817.048	81.8784		817.039	77.071		817.043	84.6019		817.049	81.5292
818.044	46.3098		818.045	55.2177		818.04	58.2806		818.045	54.3944		818.048	81.8274		818.04	77.088		818.043	84.6561		818.049	81.6052
819.044	46.3062		819.045	55.128		819.04	58.2941		819.046	54.4152		819.048	81.8282		819.04	77.0846		819.043	84.619		819.049	81.6309
820.044	46.3344		820.045	55.2028		820.04	58.3084		820.045	54.4448		820.048	81.8545		820.04	77.1046		820.043	84.6102		820.049	81.5616
821.044	46.3987		821.044	55.2515		821.039	58.3393		821.045	54.4325		821.048	81.8328		821.041	77.1145		821.043	84.6042		821.049	81.5691
822.044	46.3745		822.045	55.1947		822.04	58.3348		822.046	54.4385		822.048	81.7882		822.04	77.1191		822.043	84.6863		822.049	81.637
823.044	46.4621		823.045	55.2512		823.04	58.3751		823.045	54.5325		823.048	81.8379		823.041	77.0826		823.043	84.6118		823.049	81.5803
824.045	46.4842		824.045	55.2171		824.04	58.394		824.046	54.5011		824.048	81.8796		824.04	77.1519		824.043	84.6454		824.049	81.6211
825.044	46.4249		825.045	55.3518		825.04	58.3349		825.045	54.4678		825.048	81.8238		825.04	77.1334		825.043	84.6195		825.049	81.6121
826.044	46.4153		826.045	55.2117		826.04	58.3403		826.046	54.4972		826.048	81.8358		826.04	77.1401		826.043	84.6571		826.049	81.5978
827.045	46.5622		827.045	55.3764		827.04	58.4352		827.046	54.6217		827.048	81.8683		827.041	77.1397		827.044	84.5971		827.049	81.5459
828.044	46.5438		828.046	55.4718		828.04	58.4656		828.045	54.6086		828.048	81.8004		828.041	77.112		828.043	84.6406		828.049	81.6387
829.045	46.5671		829.046	55.3617		829.041	58.465		829.046	54.6228		829.048	81.7911		829.041	77.106		829.044	84.6659		829.049	81.6217
830.045	46.5381		830.046	55.3885		830.041	58.4441		830.046	54.6229		830.048	81.891		830.041	77.1404		830.044	84.653		830.049	81.6184
831.045	46.6268		831.046	55.3381		831.041	58.4688		831.046	54.6001		831.048	81.9005		831.041	77.1		831.044	84.6543		831.049	81.6127
832.045	46.6493		832.046	55.4628		832.04	58.5615		832.047	54.7103		832.049	81.861		832.041	77.1169		832.044	84.6377		832.05	81.6082
833.045	46.6588		833.046	55.4266		833.041	58.5004		833.046	54.6362		833.048	81.8297		833.041	77.1429		833.044	84.6239		833.05	81.615
834.045	46.6965		834.045	55.4835		834.041	58.5652		834.047	54.6861		834.049	81.8487		834.041	77.1609		834.044	84.6452		834.05	81.6055
835.045	46.6885		835.046	55.4859		835.041	58.5521		835.047	54.7261		835.049	81.8742		835.041	77.1448		835.044	84.6687		835.05	81.624
836.045	46.7597		836.046	55.5576		836.041	58.6361		836.046	54.7776		836.049	81.8546		836.041	77.1286		836.043	84.6357		836.05	81.5948
837.045	46.7312		837.046	55.5583		837.041	58.5959		837.047	54.7761		837.049	81.9122		837.041	77.0913		837.044	84.6046		837.05	81.5631
838.045	46.7391		838.046	55.498		838.041	58.5909		838.046	54.7985		838.049	81.8578		838.041	77.1376		838.044	84.6736		838.05	81.647
839.045	46.817		839.046	55.6112		839.041	58.6604		839.047	54.848		839.049	81.8621		839.041	77.1215		839.044	84.6389		839.05	81.6027
840.045	46.7883		840.046	55.5778		840.041	58.6368		840.046	54.8064		840.049	81.8151		840.041	77.1531		840.044	84.6339		840.05	81.599
841.045	46.8818		841.046	55.6335		841.041	58.7237		841.047	54.9221		841.049	81.8414		841.041	77.1352		841.044	84.6663		841.05	81.6238
842.045	46.8184		842.046	55.5956		842.041	58.6681		842.046	54.8296		842.049	81.8411		842.042	77.0946		842.044	84.6328		842.05	81.593
843.045	46.9094		843.046	55.7259		843.041	58.73		843.047	54.9398		843.049	81.8854		843.042	77.2094		843.044	84.6451		843.05	81.5929
844.046	46.9015		844.046	55.6258		844.041	58.7427		844.047	54.9319		844.049	81.9064		844.041	77.1354		844.045	84.6172		844.051	81.5693
845.046	46.9123		845.046	55.693		845.042	58.7464		845.047	54.9383		845.049	81.8966		845.042	77.1487		845.045	84.6505		845.05	81.6037
846.046	46.9392		846.046	55.7472		846.041	58.7704		846.047	54.9589		846.05	81.8595		846.042	77.1475		846.045	84.6984		846.051	81.6537
847.046	46.9148		847.047	55.6921		847.042	58.7586		847.047	54.9945		847.049	81.8723		847.042	77.1525		847.045	84.641		847.051	81.5736
848.045	47.0095		848.046	55.8094		848.041	58.8415		848.047	55.0302		848.049	81.881		848.042	77.1414		848.044	84.6025		848.051	81.564
849.046	46.9853		849.047	55.7842		849.042	58.785		849.048	54.9849		849.05	81.898		849.042	77.1182		849.045	84.6249		849.051	81.6136
850.046	47.0695		850.047	55.7987		850.042	58.8507		850.048	55.0535		850.05	81.811		850.042	77.1331		850.045	84.6775		850.051	81.6249
851.046	47.0338		851.047	55.83		851.042	58.8286		851.047	55.0579		851.049	81.881		851.042	77.178		851.045	84.6388		851.051	81.6127
852.046	47.0852		852.046	55.7959		852.041	58.9059		852.047	55.1018		852.049	81.8487		852.042	77.1838		852.045	84.6244		852.051	81.6062
853.047	47.059		853.047	55.8686		853.042	58.8401		853.048	55.0882		853.05	81.8386		853.042	77.1146		853.045	84.6228		853.051	81.5578
854.046	47.1358		854.047	55.8945		854.042	58.9086		854.047	55.1589		854.05	81.9168		854.043	77.1321		854.045	84.6565		854.051	81.6422
855.046	47.121		855.047	55.9616		855.042	58.8662		855.047	55.0649		855.05	81.8719		855.043	77.1436		855.045	84.6744		855.051	81.594
856.046	47.1783		856.047	55.8234		856.042	58.8995		856.048	55.1392		856.05	81.8856		856.043	77.158		856.045	84.6682		856.052	81.6176
857.047	47.1844		857.047	55.9713		857.042	58.9545		857.048	55.1588		857.05	81.8378		857.043	77.1823		857.045	84.6165		857.051	81.5287
858.046	47.1766		858.047	55.9103		858.042	58.9421		858.047	55.1796		858.05	81.8582		858.043	77.1179		858.045	84.6476		858.051	81.6278
859.046	47.2256		859.047	56.0438		859.042	58.9802		859.047	55.2029		859.05	81.8706		859.043	77.1162		859.045	84.6573		859.051	81.5872
860.046	47.2105		860.047	56.0929		860.042	58.9955		860.047	55.2414		860.05	81.8721		860.042	77.1285		860.045	84.6542		860.051	81.6395
861.047	47.2758		861.047	55.9845		861.042	59.0065		861.048	55.2356		861.051	81.8456		861.043	77.1709		861.046	84.5953		861.052	81.5262
862.047	47.2345		862.048	56.1144		862.043	59.0149		862.048	55.2645		862.05	81.9233		862.043	77.1098		862.045	84.6448		862.052	81.6153
863.047	47.3453		863.047	56.0322		863.043	59.0429		863.048	55.2646		863.05	81.9295		863.043	77.1623		863.045	84.6417		863.051	81.5759
864.047	47.2917		864.047	56.0511		864.043	59.0112		864.048	55.2558		864.051	81.9114		864.043	77.1863		864.046	84.6426		864.052	81.5707
865.047	47.3816		865.047	56.1069		865.043	59.084		865.048	55.3544		865.05	81.9149		865.043	77.189		865.046	84.6175		865.051	81.5642
866.047	47.3355		866.047	56.1203		866.043	59.0868		866.048	55.3132		866.051	81.9029		866.043	77.1451		866.046	84.6299		866.052	81.49
867.047	47.3862		867.048	56.1358		867.043	59.0928		867.048	55.3433		867.05	81.8913		867.043	77.1036		867.046	84.6177		867.052	81.5539
868.047	47.3951		868.047	56.1204		868.043	59.1518		868.048	55.3885		868.051	81.9147		868.043	77.1424		868.045	84.6595		868.052	81.6233
869.047	47.4174		869.047	56.2156		869.043	59.0997		869.048	55.3552		869.051	81.8823		869.043	77.1011		869.046	84.639		869.052	81.6193
870.046	47.4845		870.048	56.1785		870.043	59.1587		870.048	55.4293		870.05	81.9378		870.043	77.1268		870.045	84.7107		870.051	81.6404
871.047	47.4357		871.048	56.1464		871.043	59.1408		871.048	55.39		871.051	81.8421		871.043	77.1492		871.046	84.6233		871.052	81.5829
872.048	47.5247		872.048	56.2239		872.043	59.1864		872.049	55.4622		872.051	81.8411		872.043	77.1545		872.046	84.6603		872.052	81.6559
873.048	47.5004		873.047	56.2578		873.043	59.176		873.049	55.4477		873.051	81.8289		873.043	77.145		873.046	84.6254		873.052	81.6076
874.048	47.4479		874.047	56.1478		874.043	59.0882		874.049	55.4025		874.051	81.8568		874.044	77.1548		874.047	84.6223		874.052	81.5508
875.047	47.5637		875.048	56.264		875.043	59.2327		875.048	55.5023		875.051	81.9045		875.043	77.1723		875.046	84.6334		875.052	81.5763
876.047	47.5005		876.048	56.2543		876.043	59.1784		876.049	55.4245		876.051	81.8437		876.044	77.1161		876.046	84.6887		876.052	81.5921
877.048	47.5848		877.047	56.3244		877.043	59.2328		877.049	55.5191		877.051	81.8574		877.043	77.162		877.047	84.6407		877.053	81.5891
878.047	47.5725		878.048	56.3603		878.043	59.2708		878.049	55.5202		878.051	81.8529		878.043	77.1244		878.046	84.6721		878.052	81.5866
879.047	47.6308		879.048	56.3422		879.043	59.279		879.048	55.5397		879.051	81.8605		879.044	77.1915		879.046	84.6384		879.052	81.5869
880.047	47.5774		880.048	56.342		880.043	59.2312		880.048	55.515		880.051	81.8516		880.044	77.1795		880.046	84.7032		880.052	81.5758
881.048	47.702		881.048	56.4954		881.043	59.3643		881.049	55.5612		881.051	81.8875		881.044	77.1554		881.047	84.6656		881.052	81.5811
882.048	47.6477		882.048	56.3489		882.043	59.3373		882.049	55.5881		882.052	81.8618		882.044	77.1709		882.047	84.7053		882.053	81.635
883.048	47.7255		883.048	56.4158		883.043	59.3802		883.049	55.653		883.051	81.9113		883.044	77.1281		883.047	84.6722		883.053	81.5681
884.048	47.7204		884.048	56.3864		884.043	59.3539		884.049	55.5815		884.052	81.8909		884.044	77.1559		884.047	84.6318		884.053	81.5655
885.048	47.7035		885.049	56.4581		885.044	59.3667		885.049	55.6748		885.052	81.8603		885.044	77.1323		885.047	84.6371		885.053	81.553
886.048	47.7522		886.049	56.4742		886.044	59.399		886.049	55.7232		886.051	81.8728		886.044	77.1261		886.046	84.6807		886.053	81.6436
887.048	47.7185		887.049	56.4318		887.044	59.3678		887.049	55.6525		887.052	81.8435		887.045	77.1503		887.047	84.6372		887.053	81.5989
888.048	47.8267		888.049	56.5426		888.044	59.4277		888.049	55.749		888.052	81.918		888.044	77.1419		888.047	84.6663		888.053	81.6227
889.048	47.7898		889.048	56.4993		889.044	59.3889		889.049	55.677		889.051	81.8899		889.045	77.117		889.046	84.6146		889.053	81.5726
890.048	47.8561		890.049	56.5912		890.044	59.5138		890.049	55.8113		890.052	81.9243		890.044	77.1792		890.047	84.61		890.053	81.5277
891.049	47.7997		891.049	56.5823		891.044	59.4552		891.05	55.7321		891.052	81.8961		891.044	77.0947		891.048	84.6194		891.053	81.5519
892.048	47.8986		892.049	56.5904		892.045	59.5413		892.049	55.8589		892.051	81.8469		892.044	77.1246		892.047	84.6524		892.052	81.5709
893.049	47.8482		893.049	56.5684		893.044	59.4772		893.05	55.8381		893.052	81.9006		893.045	77.1596		893.047	84.6356		893.053	81.5876
894.048	47.9361		894.049	56.5912		894.045	59.5671		894.049	55.8935		894.051	81.8757		894.044	77.1423		894.047	84.6634		894.052	81.617
895.049	47.8871		895.049	56.6139		895.045	59.5002		895.05	55.79		895.052	81.9024		895.044	77.1339		895.048	84.6581		895.053	81.6029
896.048	47.9305		896.049	56.6348		896.045	59.5103		896.049	55.8549		896.051	81.8915		896.045	77.125		896.047	84.5871		896.053	81.5129
897.049	47.9689		897.049	56.6694		897.045	59.5543		897.05	55.94		897.052	81.8919		897.045	77.1468		897.048	84.5992		897.053	81.5597
898.048	48.0118		898.049	56.7514		898.045	59.5642		898.049	55.9635		898.052	81.9124		898.044	77.1291		898.047	84.6255		898.053	81.525
899.048	48.0089		899.049	56.6976		899.045	59.5905		899.049	55.9137		899.051	81.8308		899.045	77.1733		899.047	84.6573		899.052	81.5864
900.048	47.9911		900.049	56.7397		900.044	59.5885		900.049	55.9083		900.051	81.9118		900.045	77.1258		900.047	84.5991		900.052	81.5282
901.048	47.9964		901.049	56.7924		901.045	59.5871		901.049	55.9962		901.052	81.8797		901.045	77.136		901.047	84.6495		901.053	81.5485
902.049	48.0225		902.049	56.7491		902.045	59.5773		902.05	55.9813		902.052	81.888		902.045	77.156		902.048	84.5971		902.053	81.557
903.049	48.0841		903.049	56.8181		903.044	59.6141		903.05	55.941		903.052	81.8629		903.045	77.1335		903.048	84.6385		903.053	81.5665
904.049	48.0831		904.05	56.822		904.045	59.6569		904.051	56.0543		904.053	81.8448		904.045	77.1358		904.048	84.6374		904.054	81.6082
905.049	48.116		905.049	56.8877		905.045	59.6922		905.05	56.0337		905.053	81.8906		905.045	77.0922		905.048	84.6024		905.054	81.5221
906.05	48.1307		906.049	56.8489		906.044	59.6925		906.051	56.0544		906.053	81.9122		906.045	77.1674		906.048	84.599		906.054	81.5532
907.049	48.147		907.05	56.936		907.045	59.6912		907.051	56.0398		907.053	81.9362		907.045	77.1014		907.048	84.6484		907.054	81.5467
908.049	48.2142		908.05	56.8792		908.045	59.713		908.05	56.0948		908.053	81.8773		908.045	77.1256		908.048	84.6217		908.054	81.5558
909.049	48.1727		909.05	56.9773		909.045	59.6975		909.05	56.0794		909.053	81.894		909.046	77.1167		909.048	84.6273		909.054	81.5135
910.05	48.1726		910.051	56.933		910.045	59.7704		910.051	56.1166		910.053	81.8817		910.045	77.1236		910.048	84.6036		910.054	81.5312
911.05	48.1969		911.05	56.9724		911.045	59.7555		911.051	56.1428		911.054	81.8987		911.046	77.1374		911.048	84.6151		911.055	81.5513
912.049	48.2664		912.05	56.9502		912.045	59.7453		912.051	56.1667		912.053	81.8694		912.045	77.1172		912.048	84.6064		912.054	81.4952
913.049	48.2438		913.05	56.958		913.045	59.7484		913.05	56.1157		913.053	81.8595		913.045	77.1291		913.048	84.6534		913.054	81.5179
914.05	48.3074		914.05	57.0377		914.045	59.8364		914.051	56.2542		914.053	81.8855		914.046	77.1218		914.048	84.6499		914.054	81.5892
915.049	48.2953		915.05	57.0082		915.045	59.8015		915.051	56.1996		915.053	81.8958		915.046	77.0999		915.048	84.5981		915.054	81.533
916.05	48.2946		916.05	57.0615		916.046	59.8358		916.051	56.2421		916.053	81.8916		916.046	77.1794		916.048	84.5716		916.055	81.4787
917.05	48.346		917.05	57.0787		917.046	59.87		917.051	56.319		917.054	81.9077		917.046	77.1541		917.048	84.633		917.055	81.5552
918.05	48.3386		918.05	57.0316		918.045	59.8247		918.051	56.2204		918.053	81.8804		918.046	77.1325		918.049	84.597		918.054	81.5082
919.05	48.4024		919.051	57.1409		919.046	59.9297		919.052	56.3531		919.054	81.902		919.046	77.1355		919.049	84.606		919.055	81.5177
920.05	48.3387		920.051	57.0789		920.046	59.8445		920.051	56.2492		920.054	81.8633		920.046	77.1329		920.049	84.6428		920.055	81.5332
921.05	48.4776		921.05	57.1213		921.046	59.9317		921.051	56.3651		921.054	81.9093		921.046	77.156		921.048	84.6225		921.055	81.5473
922.05	48.3871		922.051	57.1523		922.046	59.9272		922.052	56.3173		922.054	81.926		922.046	77.0724		922.049	84.5924		922.055	81.5088
923.051	48.4677		923.051	57.0734		923.046	59.9304		923.052	56.3329		923.054	81.9286		923.046	77.1101		923.049	84.6346		923.055	81.5247
924.05	48.4553		924.05	57.2434		924.046	59.9498		924.051	56.3758		924.054	81.9339		924.047	77.1396		924.048	84.6142		924.055	81.5478
925.05	48.4125		925.051	57.1417		925.047	59.91		925.051	56.3341		925.054	81.8739		925.047	77.1326		925.049	84.5977		925.055	81.5268
926.05	48.5432		926.051	57.2422		926.046	59.9511		926.051	56.4045		926.054	81.8993		926.047	77.102		926.048	84.6065		926.055	81.5203
927.051	48.5176		927.051	57.2498		927.047	59.96		927.052	56.3876		927.054	81.8927		927.047	77.1367		927.049	84.6256		927.055	81.5041
928.051	48.5055		928.051	57.2154		928.047	59.9746		928.052	56.4045		928.054	81.8839		928.046	77.1314		928.049	84.5712		928.055	81.466
929.05	48.5517		929.052	57.2601		929.046	60.0367		929.051	56.4783		929.054	81.9048		929.047	77.126		929.049	84.6116		929.055	81.5282
930.05	48.5248		930.051	57.2983		930.047	60.0146		930.052	56.4778		930.054	81.8626		930.047	77.1495		930.049	84.5692		930.055	81.4722
931.05	48.6004		931.051	57.279		931.046	60.0648		931.052	56.5212		931.054	81.9053		931.047	77.1416		931.049	84.5922		931.056	81.4831
932.051	48.5613		932.051	57.3326		932.047	60.0216		932.052	56.4312		932.054	81.8623		932.047	77.0973		932.049	84.5791		932.055	81.4679
933.05	48.6252		933.052	57.2888		933.047	60.0657		933.052	56.4855		933.054	81.8666		933.047	77.1229		933.049	84.5573		933.055	81.5216
934.051	48.5894		934.051	57.3552		934.047	60.05		934.053	56.4806		934.055	81.8973		934.047	77.1172		934.05	84.5773		934.056	81.4758
935.05	48.6574		935.051	57.3171		935.047	60.0751		935.052	56.5136		935.054	81.9291		935.047	77.0965		935.049	84.5664		935.055	81.474
936.051	48.632		936.052	57.3638		936.047	60.0959		936.052	56.5161		936.054	81.8349		936.047	77.1167		936.05	84.5956		936.055	81.4647
937.051	48.6905		937.052	57.3767		937.047	60.0994		937.052	56.6414		937.054	81.8673		937.047	77.1566		937.05	84.6186		937.055	81.4798
938.051	48.6696		938.051	57.4287		938.047	60.091		938.052	56.5708		938.055	81.8109		938.047	77.1643		938.05	84.5843		938.056	81.4282
939.051	48.7677		939.052	57.4826		939.047	60.1533		939.053	56.6112		939.055	81.9117		939.048	77.1192		939.05	84.5748		939.056	81.4936
940.051	48.7469		940.052	57.4434		940.047	60.1466		940.052	56.5913		940.055	81.8764		940.048	77.164		940.05	84.6058		940.056	81.4654
941.052	48.7511		941.052	57.4519		941.047	60.2027		941.053	56.6395		941.055	81.9524		941.047	77.1163		941.05	84.6092		941.057	81.469
942.051	48.776		942.052	57.5197		942.047	60.2082		942.053	56.6568		942.055	81.9208		942.047	77.0996		942.05	84.5964		942.056	81.4626
943.052	48.7527		943.052	57.4943		943.048	60.1394		943.053	56.5981		943.055	81.8311		943.048	77.1257		943.051	84.5654		943.056	81.4721
944.052	48.824		944.051	57.5572		944.047	60.2529		944.053	56.769		944.055	81.8908		944.048	77.1347		944.05	84.6158		944.056	81.513
945.052	48.8075		945.051	57.5738		945.047	60.2092		945.053	56.6695		945.055	81.849		945.048	77.0813		945.051	84.6102		945.056	81.4715
946.052	48.8619		946.052	57.59		946.047	60.2465		946.053	56.7658		946.054	81.8962		946.048	77.0762		946.051	84.5326		946.056	81.4809
947.051	48.8253		947.052	57.5514		947.048	60.2581		947.053	56.7356		947.054	81.8872		947.048	77.12		947.051	84.5863		947.056	81.4821
948.052	48.8899		948.051	57.558		948.047	60.3021		948.053	56.767		948.055	81.8784		948.048	77.1507		948.051	84.5984		948.056	81.4747
949.052	48.8793		949.053	57.7016		949.048	60.2946		949.053	56.7856		949.055	81.9164		949.048	77.1383		949.051	84.5733		949.056	81.4472
950.052	48.9176		950.052	57.6038		950.048	60.3077		950.053	56.859		950.056	81.8643		950.048	77.1192		950.051	84.6003		950.057	81.4948
951.052	48.9235		951.052	57.7136		951.047	60.3043		951.053	56.8244		951.055	81.8805		951.048	77.0749		951.051	84.5583		951.056	81.4336
952.052	48.9467		952.053	57.652		952.048	60.3114		952.053	56.8439		952.056	81.88		952.048	77.1477		952.051	84.5819		952.057	81.4893
953.052	48.953		953.052	57.6404		953.048	60.3333		953.053	56.8421		953.056	81.8878		953.048	77.1201		953.051	84.6165		953.057	81.5081
954.052	48.9578		954.053	57.7092		954.048	60.3234		954.053	56.7871		954.056	81.8739		954.048	77.1223		954.051	84.5486		954.057	81.4151
955.053	49.0156		955.052	57.6737		955.047	60.3433		955.054	56.8376		955.056	81.9165		955.048	77.1176		955.051	84.6278		955.057	81.5054
956.052	49.008		956.052	57.7924		956.047	60.3591		956.053	56.85		956.056	81.8844		956.048	77.1482		956.051	84.5848		956.057	81.4395
957.052	49.0326		957.053	57.7308		957.048	60.3643		957.053	56.795		957.055	81.8717		957.048	77.1544		957.051	84.6103		957.057	81.4695
958.053	49.0526		958.053	57.7566		958.048	60.4105		958.054	56.9612		958.056	81.9001		958.048	77.1213		958.051	84.5983		958.057	81.507
959.052	49.0624		959.052	57.7553		959.047	60.4004		959.054	56.9176		959.056	81.9433		959.049	77.1219		959.051	84.5976		959.057	81.4744
960.052	49.0397		960.053	57.7541		960.048	60.3765		960.053	56.8914		960.056	81.904		960.048	77.1461		960.051	84.5661		960.057	81.4679
961.052	49.0923		961.053	57.8364		961.048	60.427		961.053	56.8911		961.056	81.8969		961.048	77.1907		961.051	84.5716		961.057	81.47
962.052	49.0936		962.053	57.8179		962.048	60.3972		962.053	56.9068		962.055	81.9176		962.049	77.1529		962.05	84.6049		962.056	81.4881
963.052	49.1751		963.053	57.8923		963.048	60.4364		963.053	56.9799		963.055	81.9038		963.048	77.1327		963.051	84.6229		963.056	81.4959
964.052	49.1339		964.053	57.7798		964.048	60.4457		964.053	57.0244		964.056	81.8709		964.049	77.0966		964.051	84.6409		964.057	81.5165
965.052	49.169		965.053	57.9037		965.048	60.4922		965.053	57.0246		965.056	81.9371		965.048	77.1393		965.051	84.64		965.057	81.5452
966.052	49.1662		966.053	57.8751		966.048	60.4837		966.053	56.9839		966.056	81.9152		966.049	77.1636		966.051	84.6411		966.057	81.5088
967.052	49.2285		967.053	57.855		967.048	60.5552		967.053	57.1276		967.055	81.9137		967.049	77.1541		967.051	84.638		967.057	81.5413
968.052	49.1815		968.054	57.8723		968.049	60.4769		968.053	57.0005		968.055	81.8441		968.049	77.1418		968.051	84.6108		968.057	81.4772
969.053	49.2535		969.053	57.9312		969.049	60.5455		969.053	57.0785		969.056	81.927		969.049	77.1429		969.052	84.5992		969.057	81.467
970.052	49.274		970.053	57.9934		970.049	60.5689		970.053	57.1339		970.056	81.8893		970.049	77.1307		970.051	84.5686		970.057	81.4691
971.052	49.2576		971.054	57.8919		971.049	60.5404		971.053	57.1013		971.056	81.9014		971.049	77.1362		971.051	84.5922		971.057	81.4937
972.052	49.278		972.053	58.0037		972.048	60.5659		972.053	57.117		972.056	81.8981		972.049	77.1301		972.051	84.585		972.057	81.4782
973.053	49.2706		973.054	58.0217		973.048	60.598		973.054	57.1535		973.056	81.934		973.049	77.1293		973.052	84.6106		973.058	81.4891
974.053	49.3285		974.054	58.043		974.049	60.5921		974.054	57.1533		974.056	81.9001		974.049	77.1075		974.052	84.5818		974.057	81.4735
975.053	49.3085		975.053	58.0279		975.049	60.5611		975.054	57.1426		975.057	81.857		975.049	77.1858		975.052	84.5767		975.058	81.4887
976.053	49.3782		976.054	58.0701		976.049	60.6483		976.054	57.2156		976.056	81.8927		976.05	77.0904		976.052	84.6097		976.058	81.5138
977.053	49.3504		977.054	58.101		977.049	60.6084		977.054	57.1864		977.057	81.9431		977.05	77.1281		977.052	84.5598		977.058	81.4634
978.053	49.4131		978.054	58.0356		978.049	60.6381		978.054	57.2171		978.057	81.8741		978.05	77.1058		978.052	84.5977		978.058	81.4384
979.053	49.4397		979.054	58.1303		979.049	60.6533		979.054	57.1894		979.057	81.9565		979.05	77.1615		979.052	84.6503		979.058	81.5362
980.053	49.4142		980.054	58.0505		980.05	60.6704		980.054	57.258		980.057	81.8659		980.05	77.158		980.052	84.5979		980.058	81.4884
981.053	49.4619		981.054	58.15		981.049	60.7028		981.055	57.2963		981.057	81.8985		981.05	77.1774		981.053	84.599		981.058	81.4717
982.053	49.4278		982.054	58.0729		982.05	60.7047		982.054	57.2687		982.057	81.9163		982.05	77.1522		982.052	84.6233		982.058	81.4918
983.053	49.4851		983.055	58.1927		983.05	60.7171		983.055	57.2898		983.057	81.9093		983.05	77.1453		983.052	84.6151		983.058	81.477
984.054	49.4427		984.054	58.1095		984.05	60.7199		984.055	57.3091		984.057	81.8812		984.05	77.1393		984.053	84.5824		984.058	81.4496
985.054	49.5323		985.054	58.1861		985.05	60.7356		985.055	57.3396		985.057	81.8573		985.05	77.1365		985.053	84.5891		985.058	81.4491
986.053	49.4957		986.054	58.221		986.05	60.7728		986.055	57.3547		986.057	81.9393		986.05	77.1497		986.052	84.5927		986.058	81.486
987.054	49.5309		987.055	58.2012		987.05	60.7614		987.055	57.4041		987.057	81.9057		987.051	77.1442		987.053	84.5949		987.058	81.4646
988.053	49.5133		988.055	58.261		988.05	60.7866		988.055	57.3783		988.057	81.8904		988.051	77.129		988.053	84.5765		988.058	81.4594
989.054	49.601		989.055	58.2117		989.05	60.8012		989.055	57.3812		989.057	81.9384		989.05	77.1309		989.053	84.5957		989.058	81.4795
990.054	49.6486		990.054	58.2739		990.05	60.847		990.056	57.4638		990.058	81.9056		990.051	77.1303		990.053	84.6336		990.06	81.5209
991.054	49.4977		991.055	58.25		991.05	60.759		991.056	57.3276		991.058	81.9099		991.051	77.1219		991.053	84.5711		991.059	81.4264
992.055	49.5976		992.054	58.3274		992.05	60.8441		992.056	57.4374		992.058	81.8762		992.051	77.1312		992.053	84.5671		992.059	81.4538
993.054	49.6606		993.054	58.3276		993.05	60.9098		993.055	57.5128		993.058	81.9442		993.051	77.1593		993.053	84.6028		993.059	81.4629
994.054	49.6189		994.055	58.2922		994.05	60.8355		994.056	57.454		994.058	81.9232		994.051	77.1026		994.053	84.588		994.059	81.453
995.055	49.7005		995.055	58.3801		995.05	60.8876		995.056	57.5115		995.058	81.9116		995.051	77.1396		995.053	84.631		995.059	81.492
996.054	49.6381		996.054	58.3168		996.05	60.8541		996.056	57.4397		996.058	81.9296		996.051	77.1122		996.053	84.579		996.059	81.4338
997.054	49.7036		997.054	58.3433		997.05	60.901		997.055	57.501		997.058	81.9128		997.05	77.1428		997.053	84.6579		997.058	81.477
998.054	49.7081		998.055	58.402		998.05	60.9176		998.055	57.5517		998.057	81.9234		998.05	77.1703		998.053	84.6097		998.058	81.4782
999.055	49.7646		999.055	58.4886		999.05	60.9521		999.056	57.519		999.058	81.932		999.051	77.1639		999.054	84.6272		999.059	81.4951
1000.05	49.7361		1000.05	58.4113		1000.05	60.8949		1000.05	57.5238		1000.06	81.8851		1000.05	77.1552		1000.05	84.5953		1000.06	81.4744
